# Supplementary material for: MicroRNA-Related Polymorphism and Their Association With Fibromyalgia
Source: Preprints.org preprint supplement (doi:10.20944/preprints202306.0026.v1), 2023-06-01
Supplement: Supplementary file 1 [file supplementary]

## Sheet: literature miRNAs
study	miRNA
Clos-Garcia et al., EBioMedicine, 2019 PMID: 31327695	hsa-miR-335-5p
Bjersing et al., PLoS One, 2013 PMID: 24205312	hsa-miR-21-5p
	hsa-miR-145-5p
	hsa-miR-29a-3p
	hsa-miR-99b-5p
	hsa-miR-125b-5p
	hsa-miR-23a-3p
	hsa-miR-23b-3p
	hsa-miR-195-5p
	hsa-miR-223-3p
Bjersing et al., Rheumatol Int, 2015 PMID: 25261961	hsa-miR-103a-3p
	hsa-miR-107
	hsa-miR-320a-3p
	hsa-let-7a-5p
	hsa-miR-30b-5p
	hsa-miR-151a-5p
	hsa-miR-142-3p
	hsa-miR-374b-5p
Cerdá-Olmedo et al., PLoS One, 2015 PMID: 25803872	hsa-miR-223-3p
	hsa-miR-451a
	hsa-miR-338-3p
	hsa-miR-143-3p
	hsa-miR-145-5p
Masotti et al., Mol Neurobiol, 2017 PMID: 27796750	hsa-miR-23a-3p
	hsa-miR-1-3p
	hsa-miR-133a
	hsa-miR-346
	hsa-miR-320b
Leinders et al., Pain, 2016 PMID: 27429177	hsa-miR-103a-3p
	hsa-miR-146a
	hsa-let-7d-5p
Braun et al., PLoS One, 2020 PMID: 32941517	hsa-miR-103a-3p
	hsa-miR-107
	hsa-miR-125a-5p
	hsa-miR-130a-3p
Hussein et al., Pain Med, 2022 PMID: 35587745	hsa-miR-320a-3p
Nepotchatykh et al., Sci Rep, 2023 PMID: 36732593	hsa-miR-28-5p
	hsa-miR-29a-3p
	hsa-miR-127-3p
	hsa-miR-140-5p
	hsa-miR-150-5p
	hsa-miR-181b-5p
	hsa-miR-374b-5p
	hsa-miR-486-5p
	hsa-miR-3620-3p
	hsa-miR-4433a-5p
	hsa-miR-6819-3p
Erbacher et al., Cells, 2022 PMID: 35455956	hsa-miR-182-5p

## Sheet: miRNASNP-v3 prediction
miRNA	SNP	Gene	Binding start (miRmap)	Binding end (miRmap)	Binding start (TargetScan)	Binding end (TargetScan)	Target
hsa-miR-500b-5p	rs10491246	ARSK	95604070	95604076	95604070	95604075	Gain
hsa-miR-501-5p	rs10491246	ARSK	95604069	95604076	95604069	95604075	Gain
hsa-miR-500a-5p	rs10491246	ARSK	95604070	95604077	95604070	95604076	Gain
hsa-miR-362-5p	rs10491246	ARSK	95604070	95604076	95604070	95604075	Gain
hsa-miR-5571-5p	rs10491246	ARSK	95604071	95604077	95604071	95604076	Loss
hsa-miR-487a-3p	rs2290562	GLYR1	4803810	4803816	4803811	4803816	Gain
hsa-miR-4711-5p	rs2290562	GLYR1	4803808	4803814	4803808	4803814	Gain
hsa-miR-154-3p	rs2290562	GLYR1	4803810	4803816	4803811	4803816	Gain
hsa-miR-7112-3p	rs2290562	GLYR1	4803808	4803814	4803808	4803814	Gain
hsa-miR-487b-3p	rs2290562	GLYR1	4803810	4803816	4803811	4803816	Loss
hsa-miR-5091	rs1062073	TTC37	95464093	95464099	95464093	95464099	Gain
hsa-miR-5739	rs1062073	TTC37	95464093	95464099	95464093	95464099	Gain
hsa-miR-5188	rs1062073	TTC37	95464091	95464097	95464092	95464097	Gain
hsa-miR-3610	rs1062073	TTC37	95464090	95464097	95464091	95464097	Gain
hsa-miR-12131	rs1062073	TTC37	95464092	95464099	95464093	95464098	Loss
hsa-miR-12131	rs1062073	TTC37	95464092	95464099	95464093	95464099	Loss
hsa-miR-1270	rs1062073	TTC37	95464093	95464100	95464094	95464100	Loss
hsa-miR-1270	rs1062073	TTC37	95464093	95464100	95464093	95464100	Loss
hsa-miR-4531	rs1062073	TTC37	95464093	95464099	95464093	95464099	Loss
hsa-miR-4531	rs1062073	TTC37	95464093	95464099	95464094	95464099	Loss
hsa-miR-620	rs1062073	TTC37	95464093	95464100	95464094	95464100	Loss
hsa-miR-620	rs1062073	TTC37	95464093	95464100	95464093	95464100	Loss
hsa-miR-219b-3p	rs1062073	TTC37	95464089	95464095	95464090	95464095	Loss
hsa-miR-219a-2-3p	rs1062073	TTC37	95464089	95464095	95464090	95464095	Loss
hsa-miR-4745-5p	rs1049194	FAH	80186300	80186306	80186300	80186306	Gain
hsa-miR-4481	rs1049194	FAH	80186300	80186306	80186300	80186306	Gain
hsa-miR-6790-5p	rs1049194	FAH	80186301	80186307	80186301	80186306	Gain
hsa-miR-4682	rs1049194	FAH	80186302	80186308	80186302	80186307	Gain
hsa-miR-4658	rs1049194	FAH	80186301	80186307	80186301	80186306	Gain
hsa-miR-1238-5p	rs1049194	FAH	80186300	80186307	80186300	80186306	Gain
hsa-miR-3677-5p	rs1049194	FAH	80186299	80186305	80186299	80186304	Gain
hsa-miR-4758-5p	rs1049194	FAH	80186300	80186307	80186300	80186306	Gain
hsa-miR-5187-3p	rs1049194	FAH	80186302	80186308	80186302	80186307	Loss
hsa-miR-652-3p	rs1049194	FAH	80186298	80186304	80186298	80186303	Loss
hsa-miR-4427	rs1049194	FAH	80186302	80186308	80186302	80186307	Loss
hsa-miR-4790-3p	rs1049194	FAH	80186300	80186306	80186300	80186305	Loss
hsa-miR-4790-3p	rs1049194	FAH	80186300	80186306	80186300	80186306	Loss
hsa-miR-4680-3p	rs1049194	FAH	80186302	80186308	80186302	80186307	Loss
hsa-miR-4724-5p	rs1049194	FAH	80186303	80186309	80186303	80186308	Loss
hsa-miR-4471	rs2295963	PLPP6	4664852	4664858	4664852	4664858	Gain
hsa-miR-1292-5p	rs2295963	PLPP6	4664851	4664858	4664851	4664858	Gain
hsa-miR-3912-3p	rs2295963	PLPP6	4664849	4664855	4664849	4664854	Gain
hsa-miR-8059	rs2295963	PLPP6	4664852	4664858	4664852	4664858	Gain
hsa-miR-613	rs2295963	PLPP6	4664851	4664857	4664851	4664856	Loss
hsa-miR-518a-5p	rs2295963	PLPP6	4664847	4664853	4664847	4664852	Loss
hsa-miR-6716-5p	rs2295963	PLPP6	4664851	4664858	4664851	4664858	Loss
hsa-miR-206	rs2295963	PLPP6	4664851	4664857	4664851	4664856	Loss
hsa-miR-527	rs2295963	PLPP6	4664847	4664853	4664847	4664852	Loss
hsa-miR-5700	rs2295963	PLPP6	4664849	4664855	4664849	4664854	Loss
hsa-miR-548aw	rs2295963	PLPP6	4664847	4664853	4664847	4664852	Loss
hsa-miR-1-3p	rs2295963	PLPP6	4664851	4664857	4664851	4664856	Loss
hsa-miR-7152-5p	rs12726	UNC13B	35404838	35404844	35404838	35404843	Gain
hsa-miR-6074	rs12726	UNC13B	35404841	35404847	35404841	35404846	Gain
hsa-miR-3074-5p	rs12726	UNC13B	35404838	35404844	35404838	35404843	Gain
hsa-miR-1976	rs12726	UNC13B	35404838	35404844	35404838	35404843	Loss
hsa-miR-8084	rs12726	UNC13B	35404842	35404848	35404842	35404847	Loss
hsa-miR-200b-3p	rs12726	UNC13B	35404842	35404848	35404842	35404847	Loss
hsa-miR-200c-3p	rs12726	UNC13B	35404842	35404848	35404842	35404847	Loss
hsa-miR-429	rs12726	UNC13B	35404842	35404848	35404842	35404847	Loss
hsa-miR-6883-5p	rs4067	TEX264	51704238	51704244	51704238	51704243	Gain
hsa-miR-3196	rs4067	TEX264	51704238	51704245	51704238	51704244	Gain
hsa-miR-6795-5p	rs4067	TEX264	51704238	51704244	51704238	51704243	Gain
hsa-miR-6795-5p	rs4067	TEX264	51704239	51704245	51704239	51704244	Gain
hsa-miR-6795-5p	rs4067	TEX264	51704238	51704244	51704239	51704244	Gain
hsa-miR-6795-5p	rs4067	TEX264	51704239	51704245	51704238	51704243	Gain
hsa-miR-6846-5p	rs4067	TEX264	51704237	51704243	51704237	51704242	Gain
hsa-miR-6885-5p	rs4067	TEX264	51704237	51704244	51704237	51704243	Gain
hsa-miR-6885-5p	rs4067	TEX264	51704237	51704244	51704239	51704244	Gain
hsa-miR-6885-5p	rs4067	TEX264	51704239	51704245	51704239	51704244	Gain
hsa-miR-6885-5p	rs4067	TEX264	51704239	51704245	51704237	51704243	Gain
hsa-miR-650	rs4067	TEX264	51704236	51704243	51704236	51704242	Gain
hsa-miR-6825-5p	rs4067	TEX264	51704238	51704245	51704238	51704244	Gain
hsa-miR-149-3p	rs4067	TEX264	51704238	51704244	51704238	51704243	Gain
hsa-miR-6848-5p	rs4067	TEX264	51704237	51704243	51704237	51704242	Gain
hsa-miR-1910-3p	rs4067	TEX264	51704235	51704241	51704235	51704240	Gain
hsa-miR-2682-5p	rs4067	TEX264	51704235	51704241	51704235	51704240	Gain
hsa-miR-6783-5p	rs4067	TEX264	51704240	51704246	51704240	51704245	Gain
hsa-miR-1237-5p	rs4067	TEX264	51704237	51704243	51704237	51704242	Gain
hsa-miR-6808-5p	rs4067	TEX264	51704235	51704241	51704235	51704240	Gain
hsa-miR-4488	rs4067	TEX264	51704237	51704243	51704237	51704242	Gain
hsa-miR-6893-5p	rs4067	TEX264	51704235	51704241	51704235	51704240	Gain
hsa-miR-6743-5p	rs4067	TEX264	51704240	51704246	51704240	51704245	Gain
hsa-miR-6785-5p	rs4067	TEX264	51704238	51704244	51704238	51704243	Gain
hsa-miR-6794-5p	rs4067	TEX264	51704240	51704246	51704240	51704245	Gain
hsa-miR-4688	rs4067	TEX264	51704240	51704246	51704240	51704245	Gain
hsa-miR-940	rs4067	TEX264	51704235	51704241	51704235	51704240	Gain
hsa-miR-34b-5p	rs4067	TEX264	51704235	51704241	51704235	51704240	Gain
hsa-miR-6799-5p	rs4067	TEX264	51704238	51704244	51704238	51704243	Gain
hsa-miR-6816-5p	rs4067	TEX264	51704238	51704245	51704238	51704244	Gain
hsa-miR-1827	rs4067	TEX264	51704235	51704242	51704235	51704241	Gain
hsa-miR-939-5p	rs4067	TEX264	51704239	51704245	51704239	51704244	Gain
hsa-miR-4697-5p	rs4067	TEX264	51704237	51704243	51704237	51704242	Gain
hsa-miR-4467	rs4067	TEX264	51704237	51704243	51704237	51704242	Gain
hsa-miR-1343-5p	rs4067	TEX264	51704239	51704245	51704239	51704244	Gain
hsa-miR-6721-5p	rs4067	TEX264	51704235	51704241	51704235	51704240	Gain
hsa-miR-3180-3p	rs4067	TEX264	51704238	51704245	51704238	51704244	Gain
hsa-miR-6805-5p	rs4067	TEX264	51704240	51704246	51704240	51704245	Gain
hsa-miR-6732-5p	rs4067	TEX264	51704240	51704246	51704240	51704245	Gain
hsa-miR-6511a-5p	rs4067	TEX264	51704235	51704241	51704235	51704240	Gain
hsa-miR-6085	rs4067	TEX264	51704240	51704246	51704240	51704245	Gain
hsa-miR-6887-5p	rs4067	TEX264	51704238	51704244	51704238	51704243	Gain
hsa-miR-6887-5p	rs4067	TEX264	51704239	51704245	51704238	51704243	Gain
hsa-miR-6887-5p	rs4067	TEX264	51704238	51704244	51704239	51704244	Gain
hsa-miR-6887-5p	rs4067	TEX264	51704239	51704245	51704239	51704244	Gain
hsa-miR-486-3p	rs4067	TEX264	51704235	51704242	51704235	51704241	Gain
hsa-miR-328-5p	rs4067	TEX264	51704237	51704244	51704239	51704244	Gain
hsa-miR-328-5p	rs4067	TEX264	51704239	51704245	51704239	51704244	Gain
hsa-miR-328-5p	rs4067	TEX264	51704239	51704245	51704237	51704243	Gain
hsa-miR-328-5p	rs4067	TEX264	51704237	51704244	51704237	51704243	Gain
hsa-miR-10400-5p	rs4067	TEX264	51704237	51704243	51704237	51704242	Gain
hsa-miR-4716-3p	rs4067	TEX264	51704240	51704246	51704240	51704245	Gain
hsa-miR-449c-5p	rs4067	TEX264	51704235	51704241	51704235	51704240	Gain
hsa-miR-3175	rs4067	TEX264	51704239	51704245	51704239	51704244	Gain
hsa-miR-6820-5p	rs4067	TEX264	51704235	51704242	51704235	51704241	Gain
hsa-miR-3180	rs4067	TEX264	51704238	51704245	51704238	51704244	Gain
hsa-miR-4728-5p	rs4067	TEX264	51704238	51704244	51704238	51704243	Gain
hsa-miR-3612	rs4067	TEX264	51704236	51704243	51704236	51704242	Gain
hsa-miR-6813-5p	rs4067	TEX264	51704240	51704246	51704240	51704245	Gain
hsa-miR-7106-5p	rs4067	TEX264	51704238	51704244	51704238	51704243	Gain
hsa-miR-342-5p	rs4067	TEX264	51704239	51704245	51704239	51704244	Loss
hsa-miR-4664-5p	rs4067	TEX264	51704239	51704245	51704239	51704244	Loss
hsa-miR-363-5p	rs4067	TEX264	51704238	51704244	51704238	51704243	Loss
hsa-miR-1293	rs4067	TEX264	51704238	51704244	51704238	51704243	Loss
hsa-miR-7150	rs4067	TEX264	51704235	51704241	51704235	51704240	Loss
hsa-miR-4651	rs4067	TEX264	51704238	51704245	51704239	51704244	Loss
hsa-miR-4651	rs4067	TEX264	51704238	51704245	51704238	51704244	Loss
hsa-miR-6766-5p	rs4067	TEX264	51704238	51704244	51704238	51704243	Loss
hsa-miR-3688-5p	rs4067	TEX264	51704236	51704242	51704236	51704241	Loss
hsa-miR-6747-5p	rs4067	TEX264	51704239	51704245	51704239	51704244	Loss
hsa-miR-6756-5p	rs4067	TEX264	51704238	51704244	51704238	51704243	Loss
hsa-miR-4483	rs4067	TEX264	51704238	51704244	51704238	51704243	Loss
hsa-miR-6745	rs4067	TEX264	51704238	51704244	51704238	51704243	Loss
hsa-miR-891a-3p	rs4067	TEX264	51704236	51704242	51704236	51704241	Loss
hsa-miR-6782-5p	rs4067	TEX264	51704239	51704246	51704239	51704245	Loss
hsa-miR-608	rs4067	TEX264	51704238	51704245	51704239	51704244	Loss
hsa-miR-608	rs4067	TEX264	51704238	51704245	51704238	51704244	Loss
hsa-miR-4493	rs3809921	CTIF	48861515	48861521	48861515	48861520	Gain
hsa-miR-548al	rs3809921	CTIF	48861513	48861520	48861513	48861519	Gain
hsa-miR-3910	rs3809921	CTIF	48861514	48861520	48861514	48861519	Gain
hsa-miR-605-3p	rs3809921	CTIF	48861514	48861521	48861514	48861520	Gain
hsa-miR-124-3p	rs3809921	CTIF	48861514	48861520	48861514	48861519	Gain
hsa-miR-506-3p	rs3809921	CTIF	48861514	48861520	48861514	48861519	Gain
hsa-miR-3714	rs3809921	CTIF	48861514	48861520	48861514	48861519	Gain
hsa-miR-4445-3p	rs3809921	CTIF	48861513	48861520	48861513	48861519	Gain
hsa-miR-183-5p	rs3809921	CTIF	48861514	48861520	48861514	48861519	Loss
hsa-miR-500b-5p	rs17167929	DGKB	14148042	14148048	14148043	14148048	Gain
hsa-miR-5196-3p	rs17167929	DGKB	14148041	14148047	14148042	14148047	Gain
hsa-miR-501-5p	rs17167929	DGKB	14148042	14148048	14148043	14148048	Gain
hsa-miR-362-5p	rs17167929	DGKB	14148042	14148048	14148043	14148048	Gain
hsa-miR-5193	rs17167929	DGKB	14148041	14148047	14148042	14148047	Gain
hsa-miR-4793-5p	rs17167929	DGKB	14148041	14148047	14148042	14148047	Gain
hsa-miR-660-3p	rs17167929	DGKB	14148041	14148047	14148042	14148047	Gain
hsa-miR-4777-3p	rs17167929	DGKB	14148039	14148045	14148039	14148045	Gain
hsa-miR-3682-5p	rs17167929	DGKB	14148039	14148045	14148039	14148045	Loss
hsa-miR-33a-3p	rs76271636	KCTD10	109448685	109448692	109448686	109448692	Gain
hsa-miR-409-3p	rs76271636	KCTD10	109448685	109448691	109448686	109448691	Gain
hsa-miR-4307	rs76271636	KCTD10	109448686	109448692	109448687	109448692	Gain
hsa-miR-5189-3p	rs76271636	KCTD10	109448682	109448688	109448683	109448688	Loss
hsa-miR-1282	rs76271636	KCTD10	109448687	109448693	109448688	109448693	Loss
hsa-miR-5707	rs76271636	KCTD10	109448687	109448693	109448688	109448693	Loss
hsa-miR-216b-3p	rs11628764	ATXN3	92061631	92061638	92061632	92061638	Gain
hsa-miR-8485	rs11628764	ATXN3	92061630	92061636	92061631	92061636	Gain
hsa-miR-302c-5p	rs11628764	ATXN3	92061627	92061633	92061627	92061633	Gain
hsa-miR-603	rs11628764	ATXN3	92061630	92061637	92061631	92061637	Gain
hsa-miR-329-3p	rs11628764	ATXN3	92061630	92061636	92061631	92061636	Gain
hsa-miR-552-5p	rs11628764	ATXN3	92061626	92061632	92061627	92061632	Gain
hsa-miR-362-3p	rs11628764	ATXN3	92061630	92061636	92061631	92061636	Gain
hsa-miR-374c-5p	rs11628764	ATXN3	92061628	92061635	92061628	92061635	Loss
hsa-miR-655-3p	rs11628764	ATXN3	92061628	92061635	92061628	92061635	Loss
hsa-miR-4289	rs17167930	DGKB	14148301	14148307	14148302	14148307	Loss
hsa-miR-1179	rs17167930	DGKB	14148299	14148305	14148300	14148305	Loss
hsa-miR-4286	rs1057897	UBE2Z	48928147	48928153	48928147	48928153	Gain
hsa-miR-4762-5p	rs1057897	UBE2Z	48928142	48928148	48928142	48928147	Gain
hsa-miR-4719	rs1057897	UBE2Z	48928143	48928150	48928143	48928149	Gain
hsa-miR-6793-3p	rs1057897	UBE2Z	48928147	48928153	48928147	48928153	Loss
hsa-miR-548c-3p	rs1057897	UBE2Z	48928142	48928149	48928142	48928148	Loss
hsa-miR-4668-3p	rs1057897	UBE2Z	48928141	48928148	48928141	48928147	Loss
hsa-miR-186-3p	rs1057897	UBE2Z	48928146	48928152	48928146	48928151	Loss
hsa-miR-3613-3p	rs1057897	UBE2Z	48928144	48928150	48928144	48928149	Loss
hsa-miR-3182	rs15563	UBE2Z	48927825	48927832	48927825	48927831	Gain
hsa-miR-4724-3p	rs15563	UBE2Z	48927828	48927835	48927828	48927835	Gain
hsa-miR-320a-5p	rs15563	UBE2Z	48927827	48927833	48927827	48927832	Gain
hsa-miR-1237-3p	rs15563	UBE2Z	48927826	48927833	48927826	48927832	Gain
hsa-miR-132-3p	rs4655	ATP5F1C	7807723	7807729	7807723	7807728	Loss
hsa-miR-4328	rs4655	ATP5F1C	7807721	7807727	7807721	7807726	Loss
hsa-miR-212-3p	rs4655	ATP5F1C	7807723	7807729	7807723	7807728	Loss
hsa-miR-2355-5p	rs1044708	LANCL1	210433449	210433455	210433450	210433455	Gain
hsa-miR-1250-3p	rs1044708	LANCL1	210433453	210433459	210433454	210433459	Gain
hsa-miR-153-5p	rs1044708	LANCL1	210433453	210433459	210433454	210433459	Gain
hsa-miR-6763-3p	rs1044708	LANCL1	210433449	210433455	210433450	210433455	Gain
hsa-miR-6826-3p	rs1044708	LANCL1	210433449	210433455	210433450	210433455	Loss
hsa-miR-3127-3p	rs1044708	LANCL1	210433450	210433456	210433450	210433456	Loss
hsa-miR-6756-3p	rs1044708	LANCL1	210433450	210433456	210433450	210433456	Loss

## Sheet: miRDB target prediction
Target Rank	Target Score	miRNA Name	Gene ID	Gene Symbol	Transcript Accession	Gene Description
1	100	hsa-miR-23a-3p	7652	ZNF99	NM_001080409	zinc finger protein 99
2	100	hsa-miR-23a-3p	80031	SEMA6D	NM_153619	semaphorin 6D
3	100	hsa-miR-23a-3p	57613	FAM234B	NM_020853	family with sequence similarity 234 member B
4	100	hsa-miR-23a-3p	9865	TRIL	NM_014817	TLR4 interactor with leucine rich repeats
5	100	hsa-miR-23a-3p	27152	INTU	NM_015693	inturned planar cell polarity protein
6	100	hsa-miR-23a-3p	7697	ZNF138	NM_001271637	zinc finger protein 138
7	100	hsa-miR-23a-3p	549	AUH	NM_001306190	AU RNA binding methylglutaconyl-CoA hydratase
8	100	hsa-miR-23a-3p	257397	TAB3	NM_152787	TGF-beta activated kinase 1 (MAP3K7) binding protein 3
9	100	hsa-miR-23a-3p	11196	SEC23IP	NM_007190	SEC23 interacting protein
10	100	hsa-miR-23a-3p	403341	ZBTB34	NM_001099270	zinc finger and BTB domain containing 34
11	100	hsa-miR-23a-3p	5150	PDE7A	NM_001242318	phosphodiesterase 7A
12	100	hsa-miR-23a-3p	10891	PPARGC1A	NM_013261	PPARG coactivator 1 alpha
13	100	hsa-miR-23a-3p	5142	PDE4B	NM_001037339	phosphodiesterase 4B
14	100	hsa-miR-23a-3p	7150	TOP1	NM_003286	DNA topoisomerase I
15	100	hsa-miR-23a-3p	51274	KLF3	NM_016531	Kruppel like factor 3
16	100	hsa-miR-23a-3p	50999	TMED5	NM_001167830	transmembrane p24 trafficking protein 5
17	100	hsa-miR-23a-3p	10690	FUT9	NM_006581	fucosyltransferase 9
18	100	hsa-miR-23a-3p	143686	SESN3	NM_001271594	sestrin 3
19	100	hsa-miR-23a-3p	9829	DNAJC6	NM_001256864	DnaJ heat shock protein family (Hsp40) member C6
20	100	hsa-miR-29a-3p	50509	COL5A3	NM_015719	collagen type V alpha 3 chain
21	100	hsa-miR-29a-3p	1289	COL5A1	NM_000093	collagen type V alpha 1 chain
22	100	hsa-miR-29a-3p	80312	TET1	NM_030625	tet methylcytosine dioxygenase 1
23	100	hsa-miR-29a-3p	26959	HBP1	NM_012257	HMG-box transcription factor 1
24	100	hsa-miR-29a-3p	2200	FBN1	NM_000138	fibrillin 1
25	100	hsa-miR-29a-3p	54454	ATAD2B	NM_001242338	ATPase family, AAA domain containing 2B
26	100	hsa-miR-29a-3p	200424	TET3	NM_001287491	tet methylcytosine dioxygenase 3
27	100	hsa-miR-29a-3p	1281	COL3A1	NM_000090	collagen type III alpha 1 chain
28	100	hsa-miR-23b-3p	7652	ZNF99	NM_001080409	zinc finger protein 99
29	100	hsa-miR-23b-3p	5150	PDE7A	NM_001242318	phosphodiesterase 7A
30	100	hsa-miR-23b-3p	10891	PPARGC1A	NM_013261	PPARG coactivator 1 alpha
31	100	hsa-miR-23b-3p	51274	KLF3	NM_016531	Kruppel like factor 3
32	100	hsa-miR-23b-3p	80031	SEMA6D	NM_153619	semaphorin 6D
33	100	hsa-miR-23b-3p	57613	FAM234B	NM_020853	family with sequence similarity 234 member B
34	100	hsa-miR-23b-3p	549	AUH	NM_001306190	AU RNA binding methylglutaconyl-CoA hydratase
35	100	hsa-miR-23b-3p	5142	PDE4B	NM_001037339	phosphodiesterase 4B
36	100	hsa-miR-23b-3p	7150	TOP1	NM_003286	DNA topoisomerase I
37	100	hsa-miR-23b-3p	10690	FUT9	NM_006581	fucosyltransferase 9
38	100	hsa-miR-23b-3p	27152	INTU	NM_015693	inturned planar cell polarity protein
39	100	hsa-miR-23b-3p	257397	TAB3	NM_152787	TGF-beta activated kinase 1 (MAP3K7) binding protein 3
40	100	hsa-miR-23b-3p	403341	ZBTB34	NM_001099270	zinc finger and BTB domain containing 34
41	100	hsa-miR-23b-3p	143686	SESN3	NM_001271594	sestrin 3
42	100	hsa-miR-23b-3p	9829	DNAJC6	NM_001256864	DnaJ heat shock protein family (Hsp40) member C6
43	100	hsa-miR-23b-3p	9865	TRIL	NM_014817	TLR4 interactor with leucine rich repeats
44	100	hsa-miR-23b-3p	7697	ZNF138	NM_001271637	zinc finger protein 138
45	100	hsa-miR-23b-3p	11196	SEC23IP	NM_007190	SEC23 interacting protein
46	100	hsa-miR-23b-3p	50999	TMED5	NM_001167830	transmembrane p24 trafficking protein 5
47	100	hsa-miR-145-5p	6624	FSCN1	NM_003088	fascin actin-bundling protein 1
48	100	hsa-miR-145-5p	58489	ABHD17C	NM_021214	abhydrolase domain containing 17C
49	100	hsa-miR-145-5p	2313	FLI1	NM_001167681	Fli-1 proto-oncogene, ETS transcription factor
50	100	hsa-miR-145-5p	57496	MRTFB	NM_001308142	myocardin related transcription factor B
51	100	hsa-miR-145-5p	1601	DAB2	NM_001244871	DAB2, clathrin adaptor protein
52	100	hsa-miR-145-5p	57522	SRGAP1	NM_020762	SLIT-ROBO Rho GTPase activating protein 1
53	100	hsa-miR-145-5p	23380	SRGAP2	NM_001170637	SLIT-ROBO Rho GTPase activating protein 2
54	100	hsa-miR-223-3p	55294	FBXW7	NM_001013415	F-box and WD repeat domain containing 7
55	100	hsa-miR-195-5p	5069	PAPPA	NM_002581	pappalysin 1
56	100	hsa-miR-195-5p	2194	FASN	NM_004104	fatty acid synthase
57	100	hsa-miR-195-5p	285175	UNC80	NM_032504	unc-80 homolog, NALCN channel complex subunit
58	100	hsa-miR-195-5p	2247	FGF2	NM_002006	fibroblast growth factor 2
59	100	hsa-miR-195-5p	23112	TNRC6B	NM_001024843	trinucleotide repeat containing 6B
60	100	hsa-miR-195-5p	5775	PTPN4	NM_002830	protein tyrosine phosphatase, non-receptor type 4
61	100	hsa-miR-195-5p	26147	PHF19	NM_001286842	PHD finger protein 19
62	100	hsa-miR-195-5p	27351	DESI1	NM_015704	desumoylating isopeptidase 1
63	99	hsa-miR-23a-3p	152926	PPM1K	NM_152542	protein phosphatase, Mg2+/Mn2+ dependent 1K
64	99	hsa-miR-23a-3p	389136	VGLL3	NM_016206	vestigial like family member 3
65	99	hsa-miR-23a-3p	113402	SFT2D1	NM_145169	SFT2 domain containing 1
66	99	hsa-miR-23a-3p	11254	SLC6A14	NM_007231	solute carrier family 6 member 14
67	99	hsa-miR-23a-3p	441234	ZNF716	NM_001159279	zinc finger protein 716
68	99	hsa-miR-23a-3p	205327	C2orf69	NM_153689	chromosome 2 open reading frame 69
69	99	hsa-miR-23a-3p	286410	ATP11C	NM_173694	ATPase phospholipid transporting 11C
70	99	hsa-miR-23a-3p	10783	NEK6	NM_001145001	NIMA related kinase 6
71	99	hsa-miR-23a-3p	4026	LPP	NM_001167671	LIM domain containing preferred translocation partner in lipoma
72	99	hsa-miR-23a-3p	57569	ARHGAP20	NM_001258415	Rho GTPase activating protein 20
73	99	hsa-miR-23a-3p	4360	MRC1	NM_002438	mannose receptor C-type 1
74	99	hsa-miR-23a-3p	55500	ETNK1	NM_018638	ethanolamine kinase 1
75	99	hsa-miR-23a-3p	23558	WBP2	NM_012478	WW domain binding protein 2
76	99	hsa-miR-23a-3p	285172	FAM126B	NM_173822	family with sequence similarity 126 member B
77	99	hsa-miR-23a-3p	7112	TMPO	NM_001032283	thymopoietin
78	99	hsa-miR-23a-3p	57718	PPP4R4	NM_058237	protein phosphatase 4 regulatory subunit 4
79	99	hsa-miR-23a-3p	10614	HEXIM1	NM_006460	HEXIM P-TEFb complex subunit 1
80	99	hsa-miR-23a-3p	905	CCNT2	NM_001241	cyclin T2
81	99	hsa-miR-23a-3p	8502	PKP4	NM_001304969	plakophilin 4
82	99	hsa-miR-23a-3p	5728	PTEN	NM_001304718	phosphatase and tensin homolog
83	99	hsa-miR-23a-3p	27327	TNRC6A	NM_014494	trinucleotide repeat containing 6A
84	99	hsa-miR-21-5p	55432	YOD1	NM_001276320	YOD1 deubiquitinase
85	99	hsa-miR-21-5p	56981	PRDM11	NM_001256695	PR/SET domain 11
86	99	hsa-miR-21-5p	356	FASLG	NM_001302746	Fas ligand
87	99	hsa-miR-21-5p	195828	ZNF367	NM_153695	zinc finger protein 367
88	99	hsa-miR-21-5p	7414	VCL	NM_003373	vinculin
89	99	hsa-miR-29a-3p	84444	DOT1L	NM_032482	DOT1 like histone lysine methyltransferase
90	99	hsa-miR-29a-3p	1301	COL11A1	NM_001190709	collagen type XI alpha 1 chain
91	99	hsa-miR-29a-3p	1788	DNMT3A	NM_001320893	DNA methyltransferase 3 alpha
92	99	hsa-miR-29a-3p	51050	PI15	NM_001324403	peptidase inhibitor 15
93	99	hsa-miR-29a-3p	254065	BRWD3	NM_153252	bromodomain and WD repeat domain containing 3
94	99	hsa-miR-29a-3p	3038	HAS3	NM_001199280	hyaluronan synthase 3
95	99	hsa-miR-29a-3p	340533	NEXMIF	NM_001008537	neurite extension and migration factor
96	99	hsa-miR-29a-3p	64324	NSD1	NM_022455	nuclear receptor binding SET domain protein 1
97	99	hsa-miR-29a-3p	84787	KMT5C	NM_032701	lysine methyltransferase 5C
98	99	hsa-miR-29a-3p	89795	NAV3	NM_001024383	neuron navigator 3
99	99	hsa-miR-29a-3p	89796	NAV1	NM_001167738	neuron navigator 1
100	99	hsa-miR-29a-3p	56999	ADAMTS9	NM_001318781	ADAM metallopeptidase with thrombospondin type 1 motif 9
101	99	hsa-miR-29a-3p	91404	SESTD1	NM_178123	SEC14 and spectrin domain containing 1
102	99	hsa-miR-23b-3p	152926	PPM1K	NM_152542	protein phosphatase, Mg2+/Mn2+ dependent 1K
103	99	hsa-miR-23b-3p	389136	VGLL3	NM_016206	vestigial like family member 3
104	99	hsa-miR-23b-3p	57569	ARHGAP20	NM_001258415	Rho GTPase activating protein 20
105	99	hsa-miR-23b-3p	4360	MRC1	NM_002438	mannose receptor C-type 1
106	99	hsa-miR-23b-3p	285172	FAM126B	NM_173822	family with sequence similarity 126 member B
107	99	hsa-miR-23b-3p	7112	TMPO	NM_001032283	thymopoietin
108	99	hsa-miR-23b-3p	57718	PPP4R4	NM_058237	protein phosphatase 4 regulatory subunit 4
109	99	hsa-miR-23b-3p	10614	HEXIM1	NM_006460	HEXIM P-TEFb complex subunit 1
110	99	hsa-miR-23b-3p	8502	PKP4	NM_001304969	plakophilin 4
111	99	hsa-miR-23b-3p	113402	SFT2D1	NM_145169	SFT2 domain containing 1
112	99	hsa-miR-23b-3p	286410	ATP11C	NM_173694	ATPase phospholipid transporting 11C
113	99	hsa-miR-23b-3p	10783	NEK6	NM_001145001	NIMA related kinase 6
114	99	hsa-miR-23b-3p	5728	PTEN	NM_001304718	phosphatase and tensin homolog
115	99	hsa-miR-23b-3p	27327	TNRC6A	NM_014494	trinucleotide repeat containing 6A
116	99	hsa-miR-23b-3p	11254	SLC6A14	NM_007231	solute carrier family 6 member 14
117	99	hsa-miR-23b-3p	205327	C2orf69	NM_153689	chromosome 2 open reading frame 69
118	99	hsa-miR-23b-3p	4026	LPP	NM_001167671	LIM domain containing preferred translocation partner in lipoma
119	99	hsa-miR-23b-3p	55500	ETNK1	NM_018638	ethanolamine kinase 1
120	99	hsa-miR-23b-3p	905	CCNT2	NM_001241	cyclin T2
121	99	hsa-miR-23b-3p	441234	ZNF716	NM_001159279	zinc finger protein 716
122	99	hsa-miR-23b-3p	23558	WBP2	NM_012478	WW domain binding protein 2
123	99	hsa-miR-145-5p	1182	CLCN3	NM_001243372	chloride voltage-gated channel 3
124	99	hsa-miR-145-5p	54799	MBTD1	NM_017643	mbt domain containing 1
125	99	hsa-miR-145-5p	57579	FAM135A	NM_001105531	family with sequence similarity 135 member A
126	99	hsa-miR-145-5p	6059	ABCE1	NM_001040876	ATP binding cassette subfamily E member 1
127	99	hsa-miR-145-5p	3739	KCNA4	NM_002233	potassium voltage-gated channel subfamily A member 4
128	99	hsa-miR-145-5p	120	ADD3	NM_001121	adducin 3
129	99	hsa-miR-145-5p	23321	TRIM2	NM_001130067	tripartite motif containing 2
130	99	hsa-miR-223-3p	6670	SP3	NM_001172712	Sp3 transcription factor
131	99	hsa-miR-125b-5p	90627	STARD13	NM_052851	StAR related lipid transfer domain containing 13
132	99	hsa-miR-125b-5p	158326	FREM1	NM_001177704	FRAS1 related extracellular matrix 1
133	99	hsa-miR-125b-5p	55671	PPP4R3A	NM_001284280	protein phosphatase 4 regulatory subunit 3A
134	99	hsa-miR-125b-5p	90427	BMF	NM_001003943	Bcl2 modifying factor
135	99	hsa-miR-125b-5p	2650	GCNT1	NM_001097633	glucosaminyl (N-acetyl) transferase 1
136	99	hsa-miR-125b-5p	79628	SH3TC2	NM_024577	SH3 domain and tetratricopeptide repeats 2
137	99	hsa-miR-125b-5p	619279	ZNF704	NM_001033723	zinc finger protein 704
138	99	hsa-miR-125b-5p	10620	ARID3B	NM_001307939	AT-rich interaction domain 3B
139	99	hsa-miR-195-5p	55585	UBE2Q1	NM_017582	ubiquitin conjugating enzyme E2 Q1
140	99	hsa-miR-195-5p	134353	LSM11	NM_173491	LSM11, U7 small nuclear RNA associated
141	99	hsa-miR-195-5p	5818	NECTIN1	NM_002855	nectin cell adhesion molecule 1
142	99	hsa-miR-195-5p	64762	GAREM1	NM_001242409	GRB2 associated regulator of MAPK1 subtype 1
143	99	hsa-miR-195-5p	389161	ANKUB1	NM_001315506	ankyrin repeat and ubiquitin domain containing 1
144	99	hsa-miR-195-5p	23014	FBXO21	NM_015002	F-box protein 21
145	99	hsa-miR-195-5p	898	CCNE1	NM_001238	cyclin E1
146	99	hsa-miR-195-5p	22863	ATG14	NM_014924	autophagy related 14
147	99	hsa-miR-195-5p	7798	LUZP1	NM_001142546	leucine zipper protein 1
148	99	hsa-miR-195-5p	64849	SLC13A3	NM_001193339	solute carrier family 13 member 3
149	99	hsa-miR-195-5p	25820	ARIH1	NM_005744	ariadne RBR E3 ubiquitin protein ligase 1
150	99	hsa-miR-195-5p	11320	MGAT4A	NM_001160154	alpha-1,3-mannosyl-glycoprotein 4-beta-N-acetylglucosaminyltransferase A
151	99	hsa-miR-195-5p	2048	EPHB2	NM_001309192	EPH receptor B2
152	99	hsa-miR-195-5p	8945	BTRC	NM_001256856	beta-transducin repeat containing E3 ubiquitin protein ligase
153	99	hsa-miR-195-5p	84926	SPRYD3	NM_032840	SPRY domain containing 3
154	99	hsa-miR-195-5p	402	ARL2	NM_001199745	ADP ribosylation factor like GTPase 2
155	99	hsa-miR-195-5p	8573	CASK	NM_003688	calcium/calmodulin dependent serine protein kinase
156	99	hsa-miR-195-5p	10762	NUP50	NM_007172	nucleoporin 50
157	99	hsa-miR-195-5p	9201	DCLK1	NM_001195415	doublecortin like kinase 1
158	99	hsa-miR-195-5p	220002	CYB561A3	NM_001161452	cytochrome b561 family member A3
159	99	hsa-miR-195-5p	140685	ZBTB46	NM_025224	zinc finger and BTB domain containing 46
160	99	hsa-miR-195-5p	2252	FGF7	NM_002009	fibroblast growth factor 7
161	98	hsa-miR-23a-3p	8671	SLC4A4	NM_001098484	solute carrier family 4 member 4
162	98	hsa-miR-23a-3p	286097	MICU3	NM_181723	mitochondrial calcium uptake family member 3
163	98	hsa-miR-23a-3p	51762	RAB8B	NM_016530	RAB8B, member RAS oncogene family
164	98	hsa-miR-23a-3p	143384	CACUL1	NM_153810	CDK2 associated cullin domain 1
165	98	hsa-miR-23a-3p	10105	PPIF	NM_005729	peptidylprolyl isomerase F
166	98	hsa-miR-23a-3p	51351	ZNF117	NM_015852	zinc finger protein 117
167	98	hsa-miR-23a-3p	9185	REPS2	NM_004726	RALBP1 associated Eps domain containing 2
168	98	hsa-miR-23a-3p	1456	CSNK1G3	NM_001031812	casein kinase 1 gamma 3
169	98	hsa-miR-23a-3p	79776	ZFHX4	NM_024721	zinc finger homeobox 4
170	98	hsa-miR-23a-3p	6505	SLC1A1	NM_004170	solute carrier family 1 member 1
171	98	hsa-miR-23a-3p	9448	MAP4K4	NM_001242559	mitogen-activated protein kinase kinase kinase kinase 4
172	98	hsa-miR-23a-3p	6092	ROBO2	NM_001128929	roundabout guidance receptor 2
173	98	hsa-miR-23a-3p	283659	PRTG	NM_173814	protogenin
174	98	hsa-miR-23a-3p	57532	NUFIP2	NM_020772	nuclear FMR1 interacting protein 2
175	98	hsa-miR-23a-3p	23248	RPRD2	NM_001297673	regulation of nuclear pre-mRNA domain containing 2
176	98	hsa-miR-23a-3p	10664	CTCF	NM_001191022	CCCTC-binding factor
177	98	hsa-miR-23a-3p	6447	SCG5	NM_003020	secretogranin V
178	98	hsa-miR-23a-3p	10802	SEC24A	NM_021982	SEC24 homolog A, COPII coat complex component
179	98	hsa-miR-23a-3p	51362	CDC40	NM_015891	cell division cycle 40
180	98	hsa-miR-23a-3p	79866	BORA	NM_001286746	bora, aurora kinase A activator
181	98	hsa-miR-23a-3p	2649	NR6A1	NM_001278546	nuclear receptor subfamily 6 group A member 1
182	98	hsa-miR-23a-3p	246175	CNOT6L	NM_144571	CCR4-NOT transcription complex subunit 6 like
183	98	hsa-miR-23a-3p	10499	NCOA2	NM_001321703	nuclear receptor coactivator 2
184	98	hsa-miR-23a-3p	10762	NUP50	NM_007172	nucleoporin 50
185	98	hsa-miR-23a-3p	138151	NACC2	NM_144653	NACC family member 2
186	98	hsa-miR-21-5p	6502	SKP2	NM_001243120	S-phase kinase associated protein 2
187	98	hsa-miR-21-5p	7045	TGFBI	NM_000358	transforming growth factor beta induced
188	98	hsa-miR-29a-3p	92691	TMEM169	NM_001142310	transmembrane protein 169
189	98	hsa-miR-29a-3p	1310	COL19A1	NM_001858	collagen type XIX alpha 1 chain
190	98	hsa-miR-29a-3p	11174	ADAMTS6	NM_197941	ADAM metallopeptidase with thrombospondin type 1 motif 6
191	98	hsa-miR-29a-3p	6611	SMS	NM_004595	spermine synthase
192	98	hsa-miR-29a-3p	89797	NAV2	NM_001111018	neuron navigator 2
193	98	hsa-miR-29a-3p	2074	ERCC6	NM_000124	ERCC excision repair 6, chromatin remodeling factor
194	98	hsa-miR-29a-3p	3479	IGF1	NM_001111283	insulin like growth factor 1
195	98	hsa-miR-29a-3p	403341	ZBTB34	NM_001099270	zinc finger and BTB domain containing 34
196	98	hsa-miR-29a-3p	1282	COL4A1	NM_001845	collagen type IV alpha 1 chain
197	98	hsa-miR-29a-3p	114904	C1QTNF6	NM_031910	C1q and TNF related 6
198	98	hsa-miR-29a-3p	10000	AKT3	NM_005465	AKT serine/threonine kinase 3
199	98	hsa-miR-29a-3p	4774	NFIA	NM_001134673	nuclear factor I A
200	98	hsa-miR-29a-3p	1277	COL1A1	NM_000088	collagen type I alpha 1 chain
201	98	hsa-miR-29a-3p	28951	TRIB2	NM_021643	tribbles pseudokinase 2
202	98	hsa-miR-29a-3p	4678	NASP	NM_001195193	nuclear autoantigenic sperm protein
203	98	hsa-miR-23b-3p	286097	MICU3	NM_181723	mitochondrial calcium uptake family member 3
204	98	hsa-miR-23b-3p	143384	CACUL1	NM_153810	CDK2 associated cullin domain 1
205	98	hsa-miR-23b-3p	79776	ZFHX4	NM_024721	zinc finger homeobox 4
206	98	hsa-miR-23b-3p	6092	ROBO2	NM_001128929	roundabout guidance receptor 2
207	98	hsa-miR-23b-3p	10664	CTCF	NM_001191022	CCCTC-binding factor
208	98	hsa-miR-23b-3p	246175	CNOT6L	NM_144571	CCR4-NOT transcription complex subunit 6 like
209	98	hsa-miR-23b-3p	51351	ZNF117	NM_015852	zinc finger protein 117
210	98	hsa-miR-23b-3p	1456	CSNK1G3	NM_001031812	casein kinase 1 gamma 3
211	98	hsa-miR-23b-3p	6505	SLC1A1	NM_004170	solute carrier family 1 member 1
212	98	hsa-miR-23b-3p	10802	SEC24A	NM_021982	SEC24 homolog A, COPII coat complex component
213	98	hsa-miR-23b-3p	79866	BORA	NM_001286746	bora, aurora kinase A activator
214	98	hsa-miR-23b-3p	138151	NACC2	NM_144653	NACC family member 2
215	98	hsa-miR-23b-3p	8671	SLC4A4	NM_001098484	solute carrier family 4 member 4
216	98	hsa-miR-23b-3p	10105	PPIF	NM_005729	peptidylprolyl isomerase F
217	98	hsa-miR-23b-3p	283659	PRTG	NM_173814	protogenin
218	98	hsa-miR-23b-3p	51362	CDC40	NM_015891	cell division cycle 40
219	98	hsa-miR-23b-3p	2649	NR6A1	NM_001278546	nuclear receptor subfamily 6 group A member 1
220	98	hsa-miR-23b-3p	10762	NUP50	NM_007172	nucleoporin 50
221	98	hsa-miR-23b-3p	51762	RAB8B	NM_016530	RAB8B, member RAS oncogene family
222	98	hsa-miR-23b-3p	9185	REPS2	NM_004726	RALBP1 associated Eps domain containing 2
223	98	hsa-miR-23b-3p	9448	MAP4K4	NM_001242559	mitogen-activated protein kinase kinase kinase kinase 4
224	98	hsa-miR-23b-3p	57532	NUFIP2	NM_020772	nuclear FMR1 interacting protein 2
225	98	hsa-miR-23b-3p	23248	RPRD2	NM_001297673	regulation of nuclear pre-mRNA domain containing 2
226	98	hsa-miR-23b-3p	6447	SCG5	NM_003020	secretogranin V
227	98	hsa-miR-23b-3p	10499	NCOA2	NM_001321703	nuclear receptor coactivator 2
228	98	hsa-miR-145-5p	5530	PPP3CA	NM_000944	protein phosphatase 3 catalytic subunit alpha
229	98	hsa-miR-145-5p	79829	NAA40	NM_001300800	N(alpha)-acetyltransferase 40, NatD catalytic subunit
230	98	hsa-miR-145-5p	3696	ITGB8	NM_002214	integrin subunit beta 8
231	98	hsa-miR-145-5p	4646	MYO6	NM_001300899	myosin VI
232	98	hsa-miR-145-5p	9229	DLGAP1	NM_001003809	DLG associated protein 1
233	98	hsa-miR-145-5p	10205	MPZL2	NM_005797	myelin protein zero like 2
234	98	hsa-miR-145-5p	4644	MYO5A	NM_000259	myosin VA
235	98	hsa-miR-145-5p	2005	ELK4	NM_001973	ELK4, ETS transcription factor
236	98	hsa-miR-145-5p	164	AP1G1	NM_001030007	adaptor related protein complex 1 subunit gamma 1
237	98	hsa-miR-145-5p	23271	CAMSAP2	NM_001297707	calmodulin regulated spectrin associated protein family member 2
238	98	hsa-miR-145-5p	9891	NUAK1	NM_014840	NUAK family kinase 1
239	98	hsa-miR-145-5p	4088	SMAD3	NM_005902	SMAD family member 3
240	98	hsa-miR-125b-5p	51124	IER3IP1	NM_016097	immediate early response 3 interacting protein 1
241	98	hsa-miR-125b-5p	8548	BLZF1	NM_001320973	basic leucine zipper nuclear factor 1
242	98	hsa-miR-195-5p	8434	RECK	NM_001316345	reversion inducing cysteine rich protein with kazal motifs
243	98	hsa-miR-195-5p	5324	PLAG1	NM_001114634	PLAG1 zinc finger
244	98	hsa-miR-195-5p	8313	AXIN2	NM_004655	axin 2
245	98	hsa-miR-195-5p	81491	GPR63	NM_001143957	G protein-coupled receptor 63
246	98	hsa-miR-195-5p	8867	SYNJ1	NM_001160302	synaptojanin 1
247	98	hsa-miR-195-5p	27	ABL2	NM_001136000	ABL proto-oncogene 2, non-receptor tyrosine kinase
248	98	hsa-miR-195-5p	6334	SCN8A	NM_001177984	sodium voltage-gated channel alpha subunit 8
249	98	hsa-miR-195-5p	777	CACNA1E	NM_001205293	calcium voltage-gated channel subunit alpha1 E
250	98	hsa-miR-195-5p	23761	PISD	NM_014338	phosphatidylserine decarboxylase
251	98	hsa-miR-195-5p	3759	KCNJ2	NM_000891	potassium voltage-gated channel subfamily J member 2
252	98	hsa-miR-195-5p	54980	C2orf42	NM_017880	chromosome 2 open reading frame 42
253	98	hsa-miR-195-5p	7335	UBE2V1	NM_001032288	ubiquitin conjugating enzyme E2 V1
254	98	hsa-miR-195-5p	23095	KIF1B	NM_015074	kinesin family member 1B
255	98	hsa-miR-195-5p	161742	SPRED1	NM_152594	sprouty related EVH1 domain containing 1
256	98	hsa-miR-195-5p	140890	SREK1	NM_001323529	splicing regulatory glutamic acid and lysine rich protein 1
257	98	hsa-miR-195-5p	79718	TBL1XR1	NM_001321193	transducin beta like 1 X-linked receptor 1
258	98	hsa-miR-195-5p	8897	MTMR3	NM_021090	myotubularin related protein 3
259	98	hsa-miR-195-5p	9874	TLK1	NM_001136554	tousled like kinase 1
260	98	hsa-miR-195-5p	4891	SLC11A2	NM_000617	solute carrier family 11 member 2
261	98	hsa-miR-195-5p	79817	MOB3B	NM_024761	MOB kinase activator 3B
262	98	hsa-miR-195-5p	29068	ZBTB44	NM_014155	zinc finger and BTB domain containing 44
263	98	hsa-miR-195-5p	63982	ANO3	NM_001313726	anoctamin 3
264	98	hsa-miR-195-5p	10479	SLC9A6	NM_001042537	solute carrier family 9 member A6
265	98	hsa-miR-195-5p	8862	APLN	NM_017413	apelin
266	98	hsa-miR-195-5p	10000	AKT3	NM_005465	AKT serine/threonine kinase 3
267	98	hsa-miR-195-5p	10527	IPO7	NM_006391	importin 7
268	98	hsa-miR-195-5p	153020	RASGEF1B	NM_001300735	RasGEF domain family member 1B
269	98	hsa-miR-195-5p	79065	ATG9A	NM_001077198	autophagy related 9A
270	98	hsa-miR-195-5p	132864	CPEB2	NM_001177381	cytoplasmic polyadenylation element binding protein 2
271	98	hsa-miR-195-5p	23382	AHCYL2	NM_001130720	adenosylhomocysteinase like 2
272	98	hsa-miR-195-5p	4602	MYB	NM_001130172	MYB proto-oncogene, transcription factor
273	98	hsa-miR-195-5p	894	CCND2	NM_001759	cyclin D2
274	98	hsa-miR-195-5p	3800	KIF5C	NM_004522	kinesin family member 5C
275	98	hsa-miR-195-5p	254048	UBN2	NM_173569	ubinuclein 2
276	98	hsa-miR-195-5p	10277	UBE4B	NM_001105562	ubiquitination factor E4B
277	98	hsa-miR-195-5p	403	ARL3	NM_004311	ADP ribosylation factor like GTPase 3
278	97	hsa-miR-23a-3p	8545	CGGBP1	NM_001008390	CGG triplet repeat binding protein 1
279	97	hsa-miR-23a-3p	83690	CRISPLD1	NM_031461	cysteine rich secretory protein LCCL domain containing 1
280	97	hsa-miR-23a-3p	1268	CNR1	NM_001160259	cannabinoid receptor 1
281	97	hsa-miR-23a-3p	1182	CLCN3	NM_001243372	chloride voltage-gated channel 3
282	97	hsa-miR-23a-3p	5734	PTGER4	NM_000958	prostaglandin E receptor 4
283	97	hsa-miR-23a-3p	7468	NSD2	NM_133331	nuclear receptor binding SET domain protein 2
284	97	hsa-miR-23a-3p	9306	SOCS6	NM_004232	suppressor of cytokine signaling 6
285	97	hsa-miR-23a-3p	54014	BRWD1	NM_033656	bromodomain and WD repeat domain containing 1
286	97	hsa-miR-23a-3p	116987	AGAP1	NM_001037131	ArfGAP with GTPase domain, ankyrin repeat and PH domain 1
287	97	hsa-miR-23a-3p	79669	C3orf52	NM_001171747	chromosome 3 open reading frame 52
288	97	hsa-miR-23a-3p	6777	STAT5B	NM_012448	signal transducer and activator of transcription 5B
289	97	hsa-miR-23a-3p	4214	MAP3K1	NM_005921	mitogen-activated protein kinase kinase kinase 1
290	97	hsa-miR-23a-3p	7128	TNFAIP3	NM_001270507	TNF alpha induced protein 3
291	97	hsa-miR-23a-3p	9874	TLK1	NM_001136554	tousled like kinase 1
292	97	hsa-miR-23a-3p	51379	CRLF3	NM_015986	cytokine receptor like factor 3
293	97	hsa-miR-23a-3p	266812	NAP1L5	NM_153757	nucleosome assembly protein 1 like 5
294	97	hsa-miR-23a-3p	81788	NUAK2	NM_030952	NUAK family kinase 2
295	97	hsa-miR-23a-3p	90411	MCFD2	NM_001171506	multiple coagulation factor deficiency 2
296	97	hsa-miR-23a-3p	2000	ELF4	NM_001421	E74 like ETS transcription factor 4
297	97	hsa-miR-23a-3p	10484	SEC23A	NM_006364	Sec23 homolog A, coat complex II component
298	97	hsa-miR-23a-3p	3842	TNPO1	NM_002270	transportin 1
299	97	hsa-miR-23a-3p	23673	STX12	NM_177424	syntaxin 12
300	97	hsa-miR-23a-3p	84107	ZIC4	NM_001168378	Zic family member 4
301	97	hsa-miR-23a-3p	11334	TUSC2	NM_007275	tumor suppressor 2, mitochondrial calcium regulator
302	97	hsa-miR-23a-3p	639	PRDM1	NM_001198	PR/SET domain 1
303	97	hsa-miR-23a-3p	9053	MAP7	NM_001198608	microtubule associated protein 7
304	97	hsa-miR-23a-3p	10130	PDIA6	NM_001282704	protein disulfide isomerase family A member 6
305	97	hsa-miR-23a-3p	93185	IGSF8	NM_052868	immunoglobulin superfamily member 8
306	97	hsa-miR-23a-3p	27131	SNX5	NM_001282454	sorting nexin 5
307	97	hsa-miR-23a-3p	114882	OSBPL8	NM_001003712	oxysterol binding protein like 8
308	97	hsa-miR-335-5p	22929	SEPHS1	NM_001195602	selenophosphate synthetase 1
309	97	hsa-miR-335-5p	840	CASP7	NM_001267058	caspase 7
310	97	hsa-miR-21-5p	5324	PLAG1	NM_001114634	PLAG1 zinc finger
311	97	hsa-miR-21-5p	3592	IL12A	NM_000882	interleukin 12A
312	97	hsa-miR-21-5p	153222	CREBRF	NM_153607	CREB3 regulatory factor
313	97	hsa-miR-21-5p	150786	RAB6D	NM_001077637	RAB6D, member RAS oncogene family
314	97	hsa-miR-21-5p	889	KRIT1	NM_001013406	KRIT1, ankyrin repeat containing
315	97	hsa-miR-21-5p	57162	PELI1	NM_020651	pellino E3 ubiquitin protein ligase 1
316	97	hsa-miR-21-5p	3516	RBPJ	NM_005349	recombination signal binding protein for immunoglobulin kappa J region
317	97	hsa-miR-21-5p	55103	RALGPS2	NM_152663	Ral GEF with PH domain and SH3 binding motif 2
318	97	hsa-miR-21-5p	10149	ADGRG2	NM_001184837	adhesion G protein-coupled receptor G2
319	97	hsa-miR-29a-3p	1294	COL7A1	NM_000094	collagen type VII alpha 1 chain
320	97	hsa-miR-29a-3p	10765	KDM5B	NM_001314042	lysine demethylase 5B
321	97	hsa-miR-29a-3p	29035	C16orf72	NM_014117	chromosome 16 open reading frame 72
322	97	hsa-miR-29a-3p	23500	DAAM2	NM_001201427	dishevelled associated activator of morphogenesis 2
323	97	hsa-miR-29a-3p	1734	DIO2	NM_001242503	iodothyronine deiodinase 2
324	97	hsa-miR-29a-3p	54790	TET2	NM_001127208	tet methylcytosine dioxygenase 2
325	97	hsa-miR-29a-3p	286046	XKR6	NM_173683	XK related 6
326	97	hsa-miR-29a-3p	6678	SPARC	NM_001309443	secreted protein acidic and cysteine rich
327	97	hsa-miR-29a-3p	29942	PURG	NM_001323312	purine rich element binding protein G
328	97	hsa-miR-29a-3p	5728	PTEN	NM_001304718	phosphatase and tensin homolog
329	97	hsa-miR-29a-3p	170691	ADAMTS17	NM_139057	ADAM metallopeptidase with thrombospondin type 1 motif 17
330	97	hsa-miR-29a-3p	64344	HIF3A	NM_022462	hypoxia inducible factor 3 subunit alpha
331	97	hsa-miR-29a-3p	1290	COL5A2	NM_000393	collagen type V alpha 2 chain
332	97	hsa-miR-29a-3p	1280	COL2A1	NM_001844	collagen type II alpha 1 chain
333	97	hsa-miR-29a-3p	9925	ZBTB5	NM_014872	zinc finger and BTB domain containing 5
334	97	hsa-miR-23b-3p	1182	CLCN3	NM_001243372	chloride voltage-gated channel 3
335	97	hsa-miR-23b-3p	116987	AGAP1	NM_001037131	ArfGAP with GTPase domain, ankyrin repeat and PH domain 1
336	97	hsa-miR-23b-3p	6777	STAT5B	NM_012448	signal transducer and activator of transcription 5B
337	97	hsa-miR-23b-3p	51379	CRLF3	NM_015986	cytokine receptor like factor 3
338	97	hsa-miR-23b-3p	2000	ELF4	NM_001421	E74 like ETS transcription factor 4
339	97	hsa-miR-23b-3p	27131	SNX5	NM_001282454	sorting nexin 5
340	97	hsa-miR-23b-3p	1268	CNR1	NM_001160259	cannabinoid receptor 1
341	97	hsa-miR-23b-3p	9306	SOCS6	NM_004232	suppressor of cytokine signaling 6
342	97	hsa-miR-23b-3p	9874	TLK1	NM_001136554	tousled like kinase 1
343	97	hsa-miR-23b-3p	90411	MCFD2	NM_001171506	multiple coagulation factor deficiency 2
344	97	hsa-miR-23b-3p	10484	SEC23A	NM_006364	Sec23 homolog A, coat complex II component
345	97	hsa-miR-23b-3p	84107	ZIC4	NM_001168378	Zic family member 4
346	97	hsa-miR-23b-3p	11334	TUSC2	NM_007275	tumor suppressor 2, mitochondrial calcium regulator
347	97	hsa-miR-23b-3p	10130	PDIA6	NM_001282704	protein disulfide isomerase family A member 6
348	97	hsa-miR-23b-3p	114882	OSBPL8	NM_001003712	oxysterol binding protein like 8
349	97	hsa-miR-23b-3p	5734	PTGER4	NM_000958	prostaglandin E receptor 4
350	97	hsa-miR-23b-3p	4214	MAP3K1	NM_005921	mitogen-activated protein kinase kinase kinase 1
351	97	hsa-miR-23b-3p	81788	NUAK2	NM_030952	NUAK family kinase 2
352	97	hsa-miR-23b-3p	3842	TNPO1	NM_002270	transportin 1
353	97	hsa-miR-23b-3p	23673	STX12	NM_177424	syntaxin 12
354	97	hsa-miR-23b-3p	93185	IGSF8	NM_052868	immunoglobulin superfamily member 8
355	97	hsa-miR-23b-3p	8545	CGGBP1	NM_001008390	CGG triplet repeat binding protein 1
356	97	hsa-miR-23b-3p	83690	CRISPLD1	NM_031461	cysteine rich secretory protein LCCL domain containing 1
357	97	hsa-miR-23b-3p	7468	NSD2	NM_133331	nuclear receptor binding SET domain protein 2
358	97	hsa-miR-23b-3p	54014	BRWD1	NM_033656	bromodomain and WD repeat domain containing 1
359	97	hsa-miR-23b-3p	79669	C3orf52	NM_001171747	chromosome 3 open reading frame 52
360	97	hsa-miR-23b-3p	7128	TNFAIP3	NM_001270507	TNF alpha induced protein 3
361	97	hsa-miR-23b-3p	266812	NAP1L5	NM_153757	nucleosome assembly protein 1 like 5
362	97	hsa-miR-23b-3p	639	PRDM1	NM_001198	PR/SET domain 1
363	97	hsa-miR-23b-3p	9053	MAP7	NM_001198608	microtubule associated protein 7
364	97	hsa-miR-145-5p	92369	SPSB4	NM_080862	splA/ryanodine receptor domain and SOCS box containing 4
365	97	hsa-miR-145-5p	29969	MDFIC	NM_001166345	MyoD family inhibitor domain containing
366	97	hsa-miR-145-5p	10371	SEMA3A	NM_006080	semaphorin 3A
367	97	hsa-miR-145-5p	151987	PPP4R2	NM_001318025	protein phosphatase 4 regulatory subunit 2
368	97	hsa-miR-145-5p	10625	IVNS1ABP	NM_006469	influenza virus NS1A binding protein
369	97	hsa-miR-145-5p	151258	SLC38A11	NM_001199148	solute carrier family 38 member 11
370	97	hsa-miR-145-5p	85464	SSH2	NM_001282129	slingshot protein phosphatase 2
371	97	hsa-miR-145-5p	745	MYRF	NM_001127392	myelin regulatory factor
372	97	hsa-miR-223-3p	3839	KPNA3	NM_002267	karyopherin subunit alpha 3
373	97	hsa-miR-223-3p	22800	RRAS2	NM_001102669	RAS related 2
374	97	hsa-miR-223-3p	8671	SLC4A4	NM_001134742	solute carrier family 4 member 4
375	97	hsa-miR-223-3p	51232	CRIM1	NM_016441	cysteine rich transmembrane BMP regulator 1
376	97	hsa-miR-223-3p	538	ATP7A	NM_001282224	ATPase copper transporting alpha
377	97	hsa-miR-125b-5p	23225	NUP210	NM_024923	nucleoporin 210
378	97	hsa-miR-125b-5p	578	BAK1	NM_001188	BCL2 antagonist/killer 1
379	97	hsa-miR-125b-5p	43	ACHE	NM_001302621	acetylcholinesterase (Cartwright blood group)
380	97	hsa-miR-125b-5p	65084	TMEM135	NM_001168724	transmembrane protein 135
381	97	hsa-miR-125b-5p	348938	NIPAL4	NM_001099287	NIPA like domain containing 4
382	97	hsa-miR-125b-5p	23218	NBEAL2	NM_015175	neurobeachin like 2
383	97	hsa-miR-125b-5p	3662	IRF4	NM_001195286	interferon regulatory factor 4
384	97	hsa-miR-125b-5p	54207	KCNK10	NM_021161	potassium two pore domain channel subfamily K member 10
385	97	hsa-miR-125b-5p	3790	KCNS3	NM_001282428	potassium voltage-gated channel modifier subfamily S member 3
386	97	hsa-miR-125b-5p	1795	DOCK3	NM_004947	dedicator of cytokinesis 3
387	97	hsa-miR-125b-5p	51621	KLF13	NM_015995	Kruppel like factor 13
388	97	hsa-miR-125b-5p	57530	CGN	NM_020770	cingulin
389	97	hsa-miR-125b-5p	6095	RORA	NM_002943	RAR related orphan receptor A
390	97	hsa-miR-195-5p	284358	MAMSTR	NM_001297753	MEF2 activating motif and SAP domain containing transcriptional regulator
391	97	hsa-miR-195-5p	55038	CDCA4	NM_017955	cell division cycle associated 4
392	97	hsa-miR-195-5p	2531	KDSR	NM_002035	3-ketodihydrosphingosine reductase
393	97	hsa-miR-195-5p	9493	KIF23	NM_001281301	kinesin family member 23
394	97	hsa-miR-195-5p	7020	TFAP2A	NM_001032280	transcription factor AP-2 alpha
395	97	hsa-miR-195-5p	5110	PCMT1	NM_005389	protein-L-isoaspartate (D-aspartate) O-methyltransferase
396	97	hsa-miR-195-5p	22843	PPM1E	NM_014906	protein phosphatase, Mg2+/Mn2+ dependent 1E
397	97	hsa-miR-195-5p	8036	SHOC2	NM_007373	SHOC2, leucine rich repeat scaffold protein
398	97	hsa-miR-195-5p	3356	HTR2A	NM_001165947	5-hydroxytryptamine receptor 2A
399	97	hsa-miR-195-5p	286343	LURAP1L	NM_203403	leucine rich adaptor protein 1 like
400	97	hsa-miR-195-5p	1760	DMPK	NM_001081563	DM1 protein kinase
401	97	hsa-miR-195-5p	22841	RAB11FIP2	NM_014904	RAB11 family interacting protein 2
402	97	hsa-miR-195-5p	51312	SLC25A37	NM_001317812	solute carrier family 25 member 37
403	97	hsa-miR-195-5p	55273	TMEM100	NM_001099640	transmembrane protein 100
404	97	hsa-miR-195-5p	11228	RASSF8	NM_001164746	Ras association domain family member 8
405	97	hsa-miR-195-5p	55294	FBXW7	NM_033632	F-box and WD repeat domain containing 7
406	97	hsa-miR-195-5p	11080	DNAJB4	NM_001317103	DnaJ heat shock protein family (Hsp40) member B4
407	97	hsa-miR-195-5p	2917	GRM7	NM_181874	glutamate metabotropic receptor 7
408	97	hsa-miR-195-5p	7465	WEE1	NM_001143976	WEE1 G2 checkpoint kinase
409	97	hsa-miR-195-5p	56977	STOX2	NM_020225	storkhead box 2
410	97	hsa-miR-195-5p	56603	CYP26B1	NM_001277742	cytochrome P450 family 26 subfamily B member 1
411	96	hsa-miR-23a-3p	26053	AUTS2	NM_001127231	AUTS2, activator of transcription and developmental regulator
412	96	hsa-miR-23a-3p	7082	TJP1	NM_001301025	tight junction protein 1
413	96	hsa-miR-23a-3p	9908	G3BP2	NM_012297	G3BP stress granule assembly factor 2
414	96	hsa-miR-23a-3p	54069	MIS18A	NM_018944	MIS18 kinetochore protein A
415	96	hsa-miR-23a-3p	55207	ARL8B	NM_018184	ADP ribosylation factor like GTPase 8B
416	96	hsa-miR-23a-3p	126731	CCSAP	NM_145257	centriole, cilia and spindle associated protein
417	96	hsa-miR-23a-3p	7111	TMOD1	NM_001166116	tropomodulin 1
418	96	hsa-miR-23a-3p	5569	PKIA	NM_006823	cAMP-dependent protein kinase inhibitor alpha
419	96	hsa-miR-23a-3p	283464	GXYLT1	NM_001099650	glucoside xylosyltransferase 1
420	96	hsa-miR-23a-3p	57502	NLGN4X	NM_001282145	neuroligin 4 X-linked
421	96	hsa-miR-23a-3p	54799	MBTD1	NM_017643	mbt domain containing 1
422	96	hsa-miR-23a-3p	529	ATP6V1E1	NM_001039366	ATPase H+ transporting V1 subunit E1
423	96	hsa-miR-23a-3p	339745	SPOPL	NM_001001664	speckle type BTB/POZ protein like
424	96	hsa-miR-23a-3p	11215	AKAP11	NM_016248	A-kinase anchoring protein 11
425	96	hsa-miR-23a-3p	440515	ZNF506	NM_001145404	zinc finger protein 506
426	96	hsa-miR-23a-3p	6354	CCL7	NM_006273	C-C motif chemokine ligand 7
427	96	hsa-miR-23a-3p	3174	HNF4G	NM_004133	hepatocyte nuclear factor 4 gamma
428	96	hsa-miR-23a-3p	114907	FBXO32	NM_001242463	F-box protein 32
429	96	hsa-miR-23a-3p	57690	TNRC6C	NM_001142640	trinucleotide repeat containing 6C
430	96	hsa-miR-23a-3p	90161	HS6ST2	NM_001077188	heparan sulfate 6-O-sulfotransferase 2
431	96	hsa-miR-23a-3p	374986	MIGA1	NM_001270384	mitoguardin 1
432	96	hsa-miR-23a-3p	55680	RUFY2	NM_017987	RUN and FYVE domain containing 2
433	96	hsa-miR-23a-3p	58487	CREBZF	NM_001039618	CREB/ATF bZIP transcription factor
434	96	hsa-miR-23a-3p	5458	POU4F2	NM_004575	POU class 4 homeobox 2
435	96	hsa-miR-23a-3p	8854	ALDH1A2	NM_001206897	aldehyde dehydrogenase 1 family member A2
436	96	hsa-miR-23a-3p	3840	KPNA4	NM_002268	karyopherin subunit alpha 4
437	96	hsa-miR-23a-3p	85463	ZC3H12C	NM_033390	zinc finger CCCH-type containing 12C
438	96	hsa-miR-23a-3p	1960	EGR3	NM_001199880	early growth response 3
439	96	hsa-miR-23a-3p	7403	KDM6A	NM_001291415	lysine demethylase 6A
440	96	hsa-miR-23a-3p	5906	RAP1A	NM_001010935	RAP1A, member of RAS oncogene family
441	96	hsa-miR-23a-3p	83930	STARD3NL	NM_032016	STARD3 N-terminal like
442	96	hsa-miR-23a-3p	85397	RGS8	NM_001102450	regulator of G protein signaling 8
443	96	hsa-miR-99b-5p	28951	TRIB2	NM_021643	tribbles pseudokinase 2
444	96	hsa-miR-335-5p	6429	SRSF4	NM_005626	serine and arginine rich splicing factor 4
445	96	hsa-miR-335-5p	9378	NRXN1	NM_001135659	neurexin 1
446	96	hsa-miR-335-5p	54764	ZRANB1	NM_017580	zinc finger RANBP2-type containing 1
447	96	hsa-miR-21-5p	57459	GATAD2B	NM_020699	GATA zinc finger domain containing 2B
448	96	hsa-miR-21-5p	55193	PBRM1	NM_018313	polybromo 1
449	96	hsa-miR-21-5p	10389	SCML2	NM_006089	Scm polycomb group protein like 2
450	96	hsa-miR-21-5p	91543	RSAD2	NM_080657	radical S-adenosyl methionine domain containing 2
451	96	hsa-miR-29a-3p	83872	HMCN1	NM_031935	hemicentin 1
452	96	hsa-miR-29a-3p	27315	PGAP2	NM_001283039	post-GPI attachment to proteins 2
453	96	hsa-miR-29a-3p	6059	ABCE1	NM_001040876	ATP binding cassette subfamily E member 1
454	96	hsa-miR-29a-3p	6091	ROBO1	NM_001145845	roundabout guidance receptor 1
455	96	hsa-miR-29a-3p	9509	ADAMTS2	NM_014244	ADAM metallopeptidase with thrombospondin type 1 motif 2
456	96	hsa-miR-29a-3p	8427	ZNF282	NM_001303481	zinc finger protein 282
457	96	hsa-miR-29a-3p	23177	CEP68	NM_001319100	centrosomal protein 68
458	96	hsa-miR-29a-3p	7837	PXDN	NM_012293	peroxidasin
459	96	hsa-miR-29a-3p	5910	RAP1GDS1	NM_001100426	Rap1 GTPase-GDP dissociation stimulator 1
460	96	hsa-miR-29a-3p	139285	AMER1	NM_152424	APC membrane recruitment protein 1
461	96	hsa-miR-29a-3p	1297	COL9A1	NM_001851	collagen type IX alpha 1 chain
462	96	hsa-miR-29a-3p	27314	RAB30	NM_001286059	RAB30, member RAS oncogene family
463	96	hsa-miR-29a-3p	55048	VPS37C	NM_017966	VPS37C, ESCRT-I subunit
464	96	hsa-miR-29a-3p	22856	CHSY1	NM_014918	chondroitin sulfate synthase 1
465	96	hsa-miR-29a-3p	390	RND3	NM_001254738	Rho family GTPase 3
466	96	hsa-miR-29a-3p	84676	TRIM63	NM_032588	tripartite motif containing 63
467	96	hsa-miR-29a-3p	5978	REST	NM_001193508	RE1 silencing transcription factor
468	96	hsa-miR-29a-3p	92370	PXYLP1	NM_001037172	2-phosphoxylose phosphatase 1
469	96	hsa-miR-29a-3p	23567	ZNF346	NM_001308215	zinc finger protein 346
470	96	hsa-miR-29a-3p	160851	DGKH	NM_001204504	diacylglycerol kinase eta
471	96	hsa-miR-29a-3p	6877	TAF5	NM_006951	TATA-box binding protein associated factor 5
472	96	hsa-miR-23b-3p	7111	TMOD1	NM_001166116	tropomodulin 1
473	96	hsa-miR-23b-3p	54799	MBTD1	NM_017643	mbt domain containing 1
474	96	hsa-miR-23b-3p	11215	AKAP11	NM_016248	A-kinase anchoring protein 11
475	96	hsa-miR-23b-3p	85397	RGS8	NM_001102450	regulator of G protein signaling 8
476	96	hsa-miR-23b-3p	54069	MIS18A	NM_018944	MIS18 kinetochore protein A
477	96	hsa-miR-23b-3p	55207	ARL8B	NM_018184	ADP ribosylation factor like GTPase 8B
478	96	hsa-miR-23b-3p	126731	CCSAP	NM_145257	centriole, cilia and spindle associated protein
479	96	hsa-miR-23b-3p	283464	GXYLT1	NM_001099650	glucoside xylosyltransferase 1
480	96	hsa-miR-23b-3p	57502	NLGN4X	NM_001282145	neuroligin 4 X-linked
481	96	hsa-miR-23b-3p	339745	SPOPL	NM_001001664	speckle type BTB/POZ protein like
482	96	hsa-miR-23b-3p	114907	FBXO32	NM_001242463	F-box protein 32
483	96	hsa-miR-23b-3p	374986	MIGA1	NM_001270384	mitoguardin 1
484	96	hsa-miR-23b-3p	55680	RUFY2	NM_017987	RUN and FYVE domain containing 2
485	96	hsa-miR-23b-3p	58487	CREBZF	NM_001039618	CREB/ATF bZIP transcription factor
486	96	hsa-miR-23b-3p	3840	KPNA4	NM_002268	karyopherin subunit alpha 4
487	96	hsa-miR-23b-3p	7403	KDM6A	NM_001291415	lysine demethylase 6A
488	96	hsa-miR-23b-3p	5906	RAP1A	NM_001010935	RAP1A, member of RAS oncogene family
489	96	hsa-miR-23b-3p	9908	G3BP2	NM_012297	G3BP stress granule assembly factor 2
490	96	hsa-miR-23b-3p	5569	PKIA	NM_006823	cAMP-dependent protein kinase inhibitor alpha
491	96	hsa-miR-23b-3p	529	ATP6V1E1	NM_001039366	ATPase H+ transporting V1 subunit E1
492	96	hsa-miR-23b-3p	6354	CCL7	NM_006273	C-C motif chemokine ligand 7
493	96	hsa-miR-23b-3p	3174	HNF4G	NM_004133	hepatocyte nuclear factor 4 gamma
494	96	hsa-miR-23b-3p	57690	TNRC6C	NM_001142640	trinucleotide repeat containing 6C
495	96	hsa-miR-23b-3p	5458	POU4F2	NM_004575	POU class 4 homeobox 2
496	96	hsa-miR-23b-3p	8854	ALDH1A2	NM_001206897	aldehyde dehydrogenase 1 family member A2
497	96	hsa-miR-23b-3p	1960	EGR3	NM_001199880	early growth response 3
498	96	hsa-miR-23b-3p	83930	STARD3NL	NM_032016	STARD3 N-terminal like
499	96	hsa-miR-23b-3p	26053	AUTS2	NM_001127231	AUTS2, activator of transcription and developmental regulator
500	96	hsa-miR-23b-3p	7082	TJP1	NM_001301025	tight junction protein 1
501	96	hsa-miR-23b-3p	440515	ZNF506	NM_001145404	zinc finger protein 506
502	96	hsa-miR-23b-3p	90161	HS6ST2	NM_001077188	heparan sulfate 6-O-sulfotransferase 2
503	96	hsa-miR-23b-3p	85463	ZC3H12C	NM_033390	zinc finger CCCH-type containing 12C
504	96	hsa-miR-145-5p	60468	BACH2	NM_001170794	BTB domain and CNC homolog 2
505	96	hsa-miR-145-5p	8728	ADAM19	NM_033274	ADAM metallopeptidase domain 19
506	96	hsa-miR-145-5p	865	CBFB	NM_001755	core-binding factor subunit beta
507	96	hsa-miR-145-5p	51196	PLCE1	NM_001165979	phospholipase C epsilon 1
508	96	hsa-miR-145-5p	2066	ERBB4	NM_001042599	erb-b2 receptor tyrosine kinase 4
509	96	hsa-miR-223-3p	5080	PAX6	NM_000280	paired box 6
510	96	hsa-miR-223-3p	374378	GALNT18	NM_198516	polypeptide N-acetylgalactosaminyltransferase 18
511	96	hsa-miR-223-3p	2308	FOXO1	NM_002015	forkhead box O1
512	96	hsa-miR-223-3p	6477	SIAH1	NM_001006610	siah E3 ubiquitin protein ligase 1
513	96	hsa-miR-125b-5p	55300	PI4K2B	NM_018323	phosphatidylinositol 4-kinase type 2 beta
514	96	hsa-miR-125b-5p	7274	TTPA	NM_000370	alpha tocopherol transfer protein
515	96	hsa-miR-125b-5p	79047	KCTD15	NM_024076	potassium channel tetramerization domain containing 15
516	96	hsa-miR-125b-5p	1591	CYP24A1	NM_000782	cytochrome P450 family 24 subfamily A member 1
517	96	hsa-miR-125b-5p	146050	ZSCAN29	NM_152455	zinc finger and SCAN domain containing 29
518	96	hsa-miR-125b-5p	125919	ZNF543	NM_213598	zinc finger protein 543
519	96	hsa-miR-125b-5p	23338	JADE2	NM_001289984	jade family PHD finger 2
520	96	hsa-miR-125b-5p	57688	ZSWIM6	NM_020928	zinc finger SWIM-type containing 6
521	96	hsa-miR-125b-5p	80896	NPL	NM_001200052	N-acetylneuraminate pyruvate lyase
522	96	hsa-miR-195-5p	9683	N4BP1	NM_153029	NEDD4 binding protein 1
523	96	hsa-miR-195-5p	8611	PLPP1	NM_003711	phospholipid phosphatase 1
524	96	hsa-miR-195-5p	51058	ZNF691	NM_001242739	zinc finger protein 691
525	96	hsa-miR-195-5p	85364	ZCCHC3	NM_033089	zinc finger CCHC-type containing 3
526	96	hsa-miR-195-5p	255488	RNF144B	NM_182757	ring finger protein 144B
527	96	hsa-miR-195-5p	145407	ARMH4	NM_001001872	armadillo-like helical domain containing 4
528	96	hsa-miR-195-5p	57167	SALL4	NM_001318031	spalt like transcription factor 4
529	96	hsa-miR-195-5p	28996	HIPK2	NM_001113239	homeodomain interacting protein kinase 2
530	96	hsa-miR-195-5p	9519	TBPL1	NM_001253676	TATA-box binding protein like 1
531	96	hsa-miR-195-5p	283078	MKX	NM_001242702	mohawk homeobox
532	96	hsa-miR-195-5p	25790	CFAP45	NM_012337	cilia and flagella associated protein 45
533	96	hsa-miR-195-5p	246175	CNOT6L	NM_001286790	CCR4-NOT transcription complex subunit 6 like
534	96	hsa-miR-195-5p	80031	SEMA6D	NM_153619	semaphorin 6D
535	96	hsa-miR-195-5p	5991	RFX3	NM_001282116	regulatory factor X3
536	96	hsa-miR-195-5p	84733	CBX2	NM_005189	chromobox 2
537	96	hsa-miR-195-5p	10673	TNFSF13B	NM_001145645	TNF superfamily member 13b
538	96	hsa-miR-195-5p	1896	EDA	NM_001005609	ectodysplasin A
539	96	hsa-miR-195-5p	10802	SEC24A	NM_021982	SEC24 homolog A, COPII coat complex component
540	96	hsa-miR-195-5p	11275	KLHL2	NM_001161521	kelch like family member 2
541	96	hsa-miR-195-5p	5048	PAFAH1B1	NM_000430	platelet activating factor acetylhydrolase 1b regulatory subunit 1
542	96	hsa-miR-195-5p	5774	PTPN3	NM_001145368	protein tyrosine phosphatase, non-receptor type 3
543	96	hsa-miR-195-5p	403341	ZBTB34	NM_001099270	zinc finger and BTB domain containing 34
544	96	hsa-miR-195-5p	846	CASR	NM_000388	calcium sensing receptor
545	96	hsa-miR-195-5p	4638	MYLK	NM_001321309	myosin light chain kinase
546	96	hsa-miR-195-5p	8030	CCDC6	NM_005436	coiled-coil domain containing 6
547	96	hsa-miR-195-5p	5049	PAFAH1B2	NM_002572	platelet activating factor acetylhydrolase 1b catalytic subunit 2
548	96	hsa-miR-195-5p	8774	NAPG	NM_003826	NSF attachment protein gamma
549	96	hsa-miR-195-5p	23710	GABARAPL1	NM_031412	GABA type A receptor associated protein like 1
550	96	hsa-miR-195-5p	195828	ZNF367	NM_153695	zinc finger protein 367
551	95	hsa-miR-23a-3p	22841	RAB11FIP2	NM_014904	RAB11 family interacting protein 2
552	95	hsa-miR-23a-3p	55629	PNRC2	NM_017761	proline rich nuclear receptor coactivator 2
553	95	hsa-miR-23a-3p	55768	NGLY1	NM_001145294	N-glycanase 1
554	95	hsa-miR-23a-3p	284443	ZNF493	NM_001076678	zinc finger protein 493
555	95	hsa-miR-23a-3p	5612	THAP12	NM_004705	THAP domain containing 12
556	95	hsa-miR-23a-3p	10659	CELF2	NM_001025077	CUGBP Elav-like family member 2
557	95	hsa-miR-23a-3p	1462	VCAN	NM_001126336	versican
558	95	hsa-miR-23a-3p	4502	MT2A	NM_005953	metallothionein 2A
559	95	hsa-miR-23a-3p	4659	PPP1R12A	NM_001143885	protein phosphatase 1 regulatory subunit 12A
560	95	hsa-miR-23a-3p	80351	TNKS2	NM_025235	tankyrase 2
561	95	hsa-miR-23a-3p	2048	EPHB2	NM_001309192	EPH receptor B2
562	95	hsa-miR-23a-3p	1998	ELF2	NM_006874	E74 like ETS transcription factor 2
563	95	hsa-miR-23a-3p	55778	ZNF839	NM_001267827	zinc finger protein 839
564	95	hsa-miR-23a-3p	22884	WDR37	NM_014023	WD repeat domain 37
565	95	hsa-miR-23a-3p	3570	IL6R	NM_181359	interleukin 6 receptor
566	95	hsa-miR-23a-3p	868	CBLB	NM_001321790	Cbl proto-oncogene B
567	95	hsa-miR-23a-3p	10184	LHFPL2	NM_005779	LHFPL tetraspan subfamily member 2
568	95	hsa-miR-23a-3p	7130	TNFAIP6	NM_007115	TNF alpha induced protein 6
569	95	hsa-miR-23a-3p	6314	ATXN7	NM_000333	ataxin 7
570	95	hsa-miR-23a-3p	843	CASP10	NM_032976	caspase 10
571	95	hsa-miR-23a-3p	6095	RORA	NM_002943	RAR related orphan receptor A
572	95	hsa-miR-23a-3p	29068	ZBTB44	NM_014155	zinc finger and BTB domain containing 44
573	95	hsa-miR-23a-3p	140609	NEK7	NM_133494	NIMA related kinase 7
574	95	hsa-miR-23a-3p	4233	MET	NM_000245	MET proto-oncogene, receptor tyrosine kinase
575	95	hsa-miR-335-5p	2321	FLT1	NM_001159920	fms related tyrosine kinase 1
576	95	hsa-miR-21-5p	79660	PPP1R3B	NM_001201329	protein phosphatase 1 regulatory subunit 3B
577	95	hsa-miR-21-5p	59338	PLEKHA1	NM_001195608	pleckstrin homology domain containing A1
578	95	hsa-miR-21-5p	8817	FGF18	NM_003862	fibroblast growth factor 18
579	95	hsa-miR-21-5p	10252	SPRY1	NM_005841	sprouty RTK signaling antagonist 1
580	95	hsa-miR-29a-3p	160728	SLC5A8	NM_145913	solute carrier family 5 member 8
581	95	hsa-miR-29a-3p	145864	HAPLN3	NM_001307952	hyaluronan and proteoglycan link protein 3
582	95	hsa-miR-29a-3p	1789	DNMT3B	NM_001207055	DNA methyltransferase 3 beta
583	95	hsa-miR-29a-3p	6996	TDG	NM_003211	thymine DNA glycosylase
584	95	hsa-miR-29a-3p	3976	LIF	NM_001257135	LIF, interleukin 6 family cytokine
585	95	hsa-miR-29a-3p	1021	CDK6	NM_001145306	cyclin dependent kinase 6
586	95	hsa-miR-29a-3p	9076	CLDN1	NM_021101	claudin 1
587	95	hsa-miR-29a-3p	166929	SGMS2	NM_001136257	sphingomyelin synthase 2
588	95	hsa-miR-29a-3p	253143	PRR14L	NM_173566	proline rich 14 like
589	95	hsa-miR-29a-3p	132720	FAM241A	NM_152400	family with sequence similarity 241 member A
590	95	hsa-miR-29a-3p	7187	TRAF3	NM_001199427	TNF receptor associated factor 3
591	95	hsa-miR-29a-3p	8853	ASAP2	NM_001135191	ArfGAP with SH3 domain, ankyrin repeat and PH domain 2
592	95	hsa-miR-29a-3p	149420	PDIK1L	NM_001243532	PDLIM1 interacting kinase 1 like
593	95	hsa-miR-29a-3p	114885	OSBPL11	NM_022776	oxysterol binding protein like 11
594	95	hsa-miR-29a-3p	23051	ZHX3	NM_015035	zinc fingers and homeoboxes 3
595	95	hsa-miR-29a-3p	388695	LYSMD1	NM_001136543	LysM domain containing 1
596	95	hsa-miR-23b-3p	55629	PNRC2	NM_017761	proline rich nuclear receptor coactivator 2
597	95	hsa-miR-23b-3p	284443	ZNF493	NM_001076678	zinc finger protein 493
598	95	hsa-miR-23b-3p	10659	CELF2	NM_001025077	CUGBP Elav-like family member 2
599	95	hsa-miR-23b-3p	1998	ELF2	NM_006874	E74 like ETS transcription factor 2
600	95	hsa-miR-23b-3p	5612	THAP12	NM_004705	THAP domain containing 12
601	95	hsa-miR-23b-3p	4502	MT2A	NM_005953	metallothionein 2A
602	95	hsa-miR-23b-3p	4659	PPP1R12A	NM_001143885	protein phosphatase 1 regulatory subunit 12A
603	95	hsa-miR-23b-3p	6314	ATXN7	NM_000333	ataxin 7
604	95	hsa-miR-23b-3p	29068	ZBTB44	NM_014155	zinc finger and BTB domain containing 44
605	95	hsa-miR-23b-3p	140609	NEK7	NM_133494	NIMA related kinase 7
606	95	hsa-miR-23b-3p	22841	RAB11FIP2	NM_014904	RAB11 family interacting protein 2
607	95	hsa-miR-23b-3p	1462	VCAN	NM_001126336	versican
608	95	hsa-miR-23b-3p	80351	TNKS2	NM_025235	tankyrase 2
609	95	hsa-miR-23b-3p	2048	EPHB2	NM_001309192	EPH receptor B2
610	95	hsa-miR-23b-3p	22884	WDR37	NM_014023	WD repeat domain 37
611	95	hsa-miR-23b-3p	3570	IL6R	NM_181359	interleukin 6 receptor
612	95	hsa-miR-23b-3p	10184	LHFPL2	NM_005779	LHFPL tetraspan subfamily member 2
613	95	hsa-miR-23b-3p	7130	TNFAIP6	NM_007115	TNF alpha induced protein 6
614	95	hsa-miR-23b-3p	4233	MET	NM_000245	MET proto-oncogene, receptor tyrosine kinase
615	95	hsa-miR-23b-3p	55768	NGLY1	NM_001145294	N-glycanase 1
616	95	hsa-miR-23b-3p	55778	ZNF839	NM_001267827	zinc finger protein 839
617	95	hsa-miR-23b-3p	868	CBLB	NM_001321790	Cbl proto-oncogene B
618	95	hsa-miR-23b-3p	843	CASP10	NM_032976	caspase 10
619	95	hsa-miR-23b-3p	6095	RORA	NM_002943	RAR related orphan receptor A
620	95	hsa-miR-145-5p	57685	CACHD1	NM_001293274	cache domain containing 1
621	95	hsa-miR-145-5p	23119	HIC2	NM_015094	HIC ZBTB transcriptional repressor 2
622	95	hsa-miR-145-5p	19	ABCA1	NM_005502	ATP binding cassette subfamily A member 1
623	95	hsa-miR-145-5p	494143	CHAC2	NM_001008708	ChaC cation transport regulator homolog 2
624	95	hsa-miR-145-5p	163	AP2B1	NM_001030006	adaptor related protein complex 2 subunit beta 1
625	95	hsa-miR-145-5p	83544	DNAL1	NM_001201366	dynein axonemal light chain 1
626	95	hsa-miR-145-5p	253738	EBF3	NM_001005463	EBF transcription factor 3
627	95	hsa-miR-145-5p	7175	TPR	NM_003292	translocated promoter region, nuclear basket protein
628	95	hsa-miR-145-5p	10009	ZBTB33	NM_001184742	zinc finger and BTB domain containing 33
629	95	hsa-miR-145-5p	51441	YTHDF2	NM_016258	YTH N6-methyladenosine RNA binding protein 2
630	95	hsa-miR-145-5p	55236	UBA6	NM_018227	ubiquitin like modifier activating enzyme 6
631	95	hsa-miR-145-5p	23348	DOCK9	NM_001318849	dedicator of cytokinesis 9
632	95	hsa-miR-145-5p	149041	RC3H1	NM_001300850	ring finger and CCCH-type domains 1
633	95	hsa-miR-145-5p	57532	NUFIP2	NM_020772	nuclear FMR1 interacting protein 2
634	95	hsa-miR-145-5p	56674	TMEM9B	NM_001286095	TMEM9 domain family member B
635	95	hsa-miR-223-3p	2152	F3	NM_001178096	coagulation factor III, tissue factor
636	95	hsa-miR-223-3p	51366	UBR5	NM_015902	ubiquitin protein ligase E3 component n-recognin 5
637	95	hsa-miR-223-3p	58155	PTBP2	NM_001300986	polypyrimidine tract binding protein 2
638	95	hsa-miR-223-3p	3633	INPP5B	NM_001297434	inositol polyphosphate-5-phosphatase B
639	95	hsa-miR-223-3p	23468	CBX5	NM_001127321	chromobox 5
640	95	hsa-miR-125b-5p	55206	SBNO1	NM_001167856	strawberry notch homolog 1
641	95	hsa-miR-125b-5p	2028	ENPEP	NM_001977	glutamyl aminopeptidase
642	95	hsa-miR-125b-5p	63941	NECAB3	NM_031232	N-terminal EF-hand calcium binding protein 3
643	95	hsa-miR-125b-5p	84542	KIAA1841	NM_001129993	KIAA1841
644	95	hsa-miR-125b-5p	4520	MTF1	NM_005955	metal regulatory transcription factor 1
645	95	hsa-miR-125b-5p	114883	OSBPL9	NM_148904	oxysterol binding protein like 9
646	95	hsa-miR-125b-5p	64118	DUS1L	NM_022156	dihydrouridine synthase 1 like
647	95	hsa-miR-125b-5p	9525	VPS4B	NM_004869	vacuolar protein sorting 4 homolog B
648	95	hsa-miR-125b-5p	119504	ANAPC16	NM_001242546	anaphase promoting complex subunit 16
649	95	hsa-miR-125b-5p	3988	LIPA	NM_000235	lipase A, lysosomal acid type
650	95	hsa-miR-125b-5p	6753	SSTR3	NM_001051	somatostatin receptor 3
651	95	hsa-miR-125b-5p	2113	ETS1	NM_001143820	ETS proto-oncogene 1, transcription factor
652	95	hsa-miR-125b-5p	283659	PRTG	NM_173814	protogenin
653	95	hsa-miR-125b-5p	1003	CDH5	NM_001795	cadherin 5
654	95	hsa-miR-125b-5p	219855	SLC37A2	NM_001145290	solute carrier family 37 member 2
655	95	hsa-miR-195-5p	64393	ZMAT3	NM_022470	zinc finger matrin-type 3
656	95	hsa-miR-195-5p	56061	UBFD1	NM_019116	ubiquitin family domain containing 1
657	95	hsa-miR-195-5p	79094	CHAC1	NM_001142776	ChaC glutathione specific gamma-glutamylcyclotransferase 1
658	95	hsa-miR-195-5p	55165	CEP55	NM_001127182	centrosomal protein 55
659	95	hsa-miR-195-5p	64768	IPPK	NM_022755	inositol-pentakisphosphate 2-kinase
660	95	hsa-miR-195-5p	7422	VEGFA	NM_001171627	vascular endothelial growth factor A
661	95	hsa-miR-195-5p	91584	PLXNA4	NM_020911	plexin A4
662	95	hsa-miR-195-5p	3799	KIF5B	NM_004521	kinesin family member 5B
663	95	hsa-miR-195-5p	9113	LATS1	NM_004690	large tumor suppressor kinase 1
664	95	hsa-miR-195-5p	84193	SETD3	NM_032233	SET domain containing 3, actin histidine methyltransferase
665	95	hsa-miR-195-5p	5604	MAP2K1	NM_002755	mitogen-activated protein kinase kinase 1
666	95	hsa-miR-195-5p	57154	SMURF1	NM_001199847	SMAD specific E3 ubiquitin protein ligase 1
667	95	hsa-miR-195-5p	29761	USP25	NM_001283041	ubiquitin specific peptidase 25
668	95	hsa-miR-195-5p	6814	STXBP3	NM_007269	syntaxin binding protein 3
669	95	hsa-miR-195-5p	2260	FGFR1	NM_023110	fibroblast growth factor receptor 1
670	95	hsa-miR-195-5p	4603	MYBL1	NM_001080416	MYB proto-oncogene like 1
671	95	hsa-miR-195-5p	23131	GPATCH8	NM_001002909	G-patch domain containing 8
672	95	hsa-miR-195-5p	8535	CBX4	NM_003655	chromobox 4
1	100	hsa-miR-142-3p	9839	ZEB2	NM_001171653	zinc finger E-box binding homeobox 2
2	100	hsa-miR-142-3p	54906	TASOR2	NM_017782	transcription activation suppressor family member 2
3	100	hsa-miR-107	6334	SCN8A	NM_001177984	sodium voltage-gated channel alpha subunit 8
4	100	hsa-miR-107	23405	DICER1	NM_001291628	dicer 1, ribonuclease III
5	100	hsa-miR-30b-5p	5756	TWF1	NM_001242397	twinfilin actin binding protein 1
6	100	hsa-miR-30b-5p	84002	B3GNT5	NM_032047	UDP-GlcNAc:betaGal beta-1,3-N-acetylglucosaminyltransferase 5
7	100	hsa-miR-30b-5p	8726	EED	NM_001308007	embryonic ectoderm development
8	100	hsa-miR-30b-5p	23335	WDR7	NM_015285	WD repeat domain 7
9	100	hsa-miR-30b-5p	6326	SCN2A	NM_001040142	sodium voltage-gated channel alpha subunit 2
10	100	hsa-miR-30b-5p	254065	BRWD3	NM_153252	bromodomain and WD repeat domain containing 3
11	100	hsa-miR-30b-5p	5738	PTGFRN	NM_020440	prostaglandin F2 receptor inhibitor
12	100	hsa-miR-30b-5p	123879	DCUN1D3	NM_173475	defective in cullin neddylation 1 domain containing 3
13	100	hsa-miR-30b-5p	10725	NFAT5	NM_001113178	nuclear factor of activated T cells 5
14	100	hsa-miR-30b-5p	27252	KLHL20	NM_014458	kelch like family member 20
15	100	hsa-miR-30b-5p	133522	PPARGC1B	NM_001172699	PPARG coactivator 1 beta
16	100	hsa-miR-30b-5p	7681	MKRN3	NM_005664	makorin ring finger protein 3
17	100	hsa-miR-30b-5p	57763	ANKRA2	NM_023039	ankyrin repeat family A member 2
18	100	hsa-miR-30b-5p	389421	LIN28B	NM_001004317	lin-28 homolog B
19	100	hsa-miR-30b-5p	56977	STOX2	NM_020225	storkhead box 2
20	100	hsa-miR-30b-5p	6095	RORA	NM_002943	RAR related orphan receptor A
21	100	hsa-miR-30b-5p	7976	FZD3	NM_017412	frizzled class receptor 3
22	100	hsa-miR-30b-5p	1951	CELSR3	NM_001407	cadherin EGF LAG seven-pass G-type receptor 3
23	100	hsa-miR-30b-5p	166968	MIER3	NM_001297598	MIER family member 3
24	100	hsa-miR-103a-3p	6334	SCN8A	NM_001177984	sodium voltage-gated channel alpha subunit 8
25	100	hsa-miR-103a-3p	23405	DICER1	NM_001291628	dicer 1, ribonuclease III
26	100	hsa-let-7a-5p	90627	STARD13	NM_052851	StAR related lipid transfer domain containing 13
27	100	hsa-let-7a-5p	8091	HMGA2	NM_003483	high mobility group AT-hook 2
28	100	hsa-let-7a-5p	9543	IGDCC3	NM_004884	immunoglobulin superfamily DCC subclass member 3
29	100	hsa-let-7a-5p	10642	IGF2BP1	NM_001160423	insulin like growth factor 2 mRNA binding protein 1
30	100	hsa-let-7a-5p	401720	FIGNL2	NM_001013690	fidgetin like 2
31	100	hsa-let-7a-5p	283659	PRTG	NM_173814	protogenin
32	100	hsa-let-7a-5p	2649	NR6A1	NM_001278546	nuclear receptor subfamily 6 group A member 1
33	100	hsa-let-7a-5p	389421	LIN28B	NM_001004317	lin-28 homolog B
34	100	hsa-let-7a-5p	10620	ARID3B	NM_001307939	AT-rich interaction domain 3B
35	100	hsa-let-7a-5p	122525	C14orf28	NM_001017923	chromosome 14 open reading frame 28
36	100	hsa-let-7a-5p	131405	TRIM71	NM_001039111	tripartite motif containing 71
37	100	hsa-miR-320a-3p	55432	YOD1	NM_001276320	YOD1 deubiquitinase
38	100	hsa-miR-374b-5p	56981	PRDM11	NM_001256695	PR/SET domain 11
39	100	hsa-miR-374b-5p	79668	PARP8	NM_001178055	poly(ADP-ribose) polymerase family member 8
40	99	hsa-miR-142-3p	253260	RICTOR	NM_001285439	RPTOR independent companion of MTOR complex 2
41	99	hsa-miR-142-3p	22836	RHOBTB3	NM_014899	Rho related BTB domain containing 3
42	99	hsa-miR-107	9441	MED26	NM_004831	mediator complex subunit 26
43	99	hsa-miR-107	63982	ANO3	NM_001313726	anoctamin 3
44	99	hsa-miR-107	64067	NPAS3	NM_001164749	neuronal PAS domain protein 3
45	99	hsa-miR-107	3267	AGFG1	NM_001135187	ArfGAP with FG repeats 1
46	99	hsa-miR-107	55605	KIF21A	NM_001173463	kinesin family member 21A
47	99	hsa-miR-30b-5p	253558	LCLAT1	NM_001002257	lysocardiolipin acyltransferase 1
48	99	hsa-miR-30b-5p	7514	XPO1	NM_003400	exportin 1
49	99	hsa-miR-30b-5p	55718	POLR3E	NM_001258033	RNA polymerase III subunit E
50	99	hsa-miR-30b-5p	84920	ALG10	NM_032834	ALG10, alpha-1,2-glucosyltransferase
51	99	hsa-miR-30b-5p	90324	CCDC97	NM_052848	coiled-coil domain containing 97
52	99	hsa-miR-30b-5p	5150	PDE7A	NM_001242318	phosphodiesterase 7A
53	99	hsa-miR-30b-5p	360023	ZBTB41	NM_194314	zinc finger and BTB domain containing 41
54	99	hsa-miR-30b-5p	5916	RARG	NM_000966	retinoic acid receptor gamma
55	99	hsa-miR-30b-5p	22862	FNDC3A	NM_001079673	fibronectin type III domain containing 3A
56	99	hsa-miR-30b-5p	431707	LHX8	NM_001256114	LIM homeobox 8
57	99	hsa-miR-30b-5p	4684	NCAM1	NM_000615	neural cell adhesion molecule 1
58	99	hsa-miR-30b-5p	27327	TNRC6A	NM_014494	trinucleotide repeat containing 6A
59	99	hsa-miR-30b-5p	57695	USP37	NM_020935	ubiquitin specific peptidase 37
60	99	hsa-miR-30b-5p	64089	SNX16	NM_152836	sorting nexin 16
61	99	hsa-miR-30b-5p	10234	LRRC17	NM_005824	leucine rich repeat containing 17
62	99	hsa-miR-30b-5p	5305	PIP4K2A	NM_005028	phosphatidylinositol-5-phosphate 4-kinase type 2 alpha
63	99	hsa-miR-30b-5p	203228	C9orf72	NM_001256054	chromosome 9 open reading frame 72
64	99	hsa-miR-30b-5p	4907	NT5E	NM_001204813	5'-nucleotidase ecto
65	99	hsa-miR-30b-5p	254528	MEIOB	NM_152764	meiosis specific with OB domains
66	99	hsa-miR-30b-5p	9644	SH3PXD2A	NM_014631	SH3 and PX domains 2A
67	99	hsa-miR-30b-5p	54014	BRWD1	NM_033656	bromodomain and WD repeat domain containing 1
68	99	hsa-miR-30b-5p	9134	CCNE2	NM_057749	cyclin E2
69	99	hsa-miR-30b-5p	222546	RFX6	NM_173560	regulatory factor X6
70	99	hsa-miR-30b-5p	84570	COL25A1	NM_198721	collagen type XXV alpha 1 chain
71	99	hsa-miR-30b-5p	64864	RFX7	NM_022841	regulatory factor X7
72	99	hsa-miR-30b-5p	54813	KLHL28	NM_017658	kelch like family member 28
73	99	hsa-miR-30b-5p	647309	GMNC	NM_001146686	geminin coiled-coil domain containing
74	99	hsa-miR-30b-5p	639	PRDM1	NM_001198	PR/SET domain 1
75	99	hsa-miR-103a-3p	9441	MED26	NM_004831	mediator complex subunit 26
76	99	hsa-miR-103a-3p	63982	ANO3	NM_001313726	anoctamin 3
77	99	hsa-miR-103a-3p	64067	NPAS3	NM_001164749	neuronal PAS domain protein 3
78	99	hsa-miR-103a-3p	3267	AGFG1	NM_001135187	ArfGAP with FG repeats 1
79	99	hsa-miR-103a-3p	55605	KIF21A	NM_001173463	kinesin family member 21A
80	99	hsa-let-7a-5p	55137	FIGN	NM_001321825	fidgetin, microtubule severing factor
81	99	hsa-let-7a-5p	56916	SMARCAD1	NM_001128429	SWI/SNF-related, matrix-associated actin-dependent regulator of chromatin, subfamily a, containing DEAD/H box 1
82	99	hsa-let-7a-5p	5724	PTAFR	NM_000952	platelet activating factor receptor
83	99	hsa-let-7a-5p	27031	NPHP3	NM_153240	nephrocystin 3
84	99	hsa-let-7a-5p	2628	GATM	NM_001321015	glycine amidinotransferase
85	99	hsa-let-7a-5p	23150	FRMD4B	NM_015123	FERM domain containing 4B
86	99	hsa-miR-320a-3p	6792	CDKL5	NM_001323289	cyclin dependent kinase like 5
87	99	hsa-miR-320a-3p	9480	ONECUT2	NM_004852	one cut homeobox 2
88	99	hsa-miR-320a-3p	339745	SPOPL	NM_001001664	speckle type BTB/POZ protein like
89	99	hsa-miR-320a-3p	10019	SH2B3	NM_005475	SH2B adaptor protein 3
90	99	hsa-miR-320a-3p	54886	PLPPR1	NM_017753	phospholipid phosphatase related 1
91	99	hsa-miR-320a-3p	4254	KITLG	NM_003994	KIT ligand
92	99	hsa-miR-374b-5p	7337	UBE3A	NM_000462	ubiquitin protein ligase E3A
93	99	hsa-miR-374b-5p	11112	HIBADH	NM_152740	3-hydroxyisobutyrate dehydrogenase
94	99	hsa-miR-374b-5p	253559	CADM2	NM_001167675	cell adhesion molecule 2
95	99	hsa-miR-374b-5p	55728	N4BP2	NM_018177	NEDD4 binding protein 2
96	99	hsa-miR-374b-5p	93	ACVR2B	NM_001106	activin A receptor type 2B
97	99	hsa-miR-374b-5p	2565	GABRG1	NM_173536	gamma-aminobutyric acid type A receptor gamma1 subunit
98	99	hsa-miR-374b-5p	23090	ZNF423	NM_001271620	zinc finger protein 423
99	99	hsa-miR-374b-5p	2019	EN1	NM_001426	engrailed homeobox 1
100	99	hsa-miR-374b-5p	120	ADD3	NM_019903	adducin 3
101	99	hsa-miR-374b-5p	374354	NHLRC2	NM_198514	NHL repeat containing 2
102	99	hsa-miR-374b-5p	81832	NETO1	NM_138999	neuropilin and tolloid like 1
103	98	hsa-miR-142-3p	5756	TWF1	NM_001242397	twinfilin actin binding protein 1
104	98	hsa-miR-142-3p	9575	CLOCK	NM_001267843	clock circadian regulator
105	98	hsa-miR-142-3p	55870	ASH1L	NM_018489	ASH1 like histone lysine methyltransferase
106	98	hsa-miR-107	79572	ATP13A3	NM_024524	ATPase 13A3
107	98	hsa-miR-107	9683	N4BP1	NM_153029	NEDD4 binding protein 1
108	98	hsa-miR-107	5756	TWF1	NM_001242397	twinfilin actin binding protein 1
109	98	hsa-miR-107	8313	AXIN2	NM_004655	axin 2
110	98	hsa-miR-107	51499	TRIAP1	NM_016399	TP53 regulated inhibitor of apoptosis 1
111	98	hsa-miR-107	9949	AMMECR1	NM_001025580	Alport syndrome, mental retardation, midface hypoplasia and elliptocytosis chromosomal region gene 1
112	98	hsa-miR-107	54861	SNRK	NM_001100594	SNF related kinase
113	98	hsa-miR-107	55294	FBXW7	NM_033632	F-box and WD repeat domain containing 7
114	98	hsa-miR-30b-5p	55814	BDP1	NM_018429	B double prime 1, subunit of RNA polymerase III transcription initiation factor IIIB
115	98	hsa-miR-30b-5p	286133	SCARA5	NM_173833	scavenger receptor class A member 5
116	98	hsa-miR-30b-5p	6335	SCN9A	NM_002977	sodium voltage-gated channel alpha subunit 9
117	98	hsa-miR-30b-5p	22936	ELL2	NM_012081	elongation factor for RNA polymerase II 2
118	98	hsa-miR-30b-5p	6322	SCML1	NM_006746	Scm polycomb group protein like 1
119	98	hsa-miR-30b-5p	134957	STXBP5	NM_001127715	syntaxin binding protein 5
120	98	hsa-miR-30b-5p	22998	LIMCH1	NM_001112717	LIM and calponin homology domains 1
121	98	hsa-miR-30b-5p	4629	MYH11	NM_001040113	myosin heavy chain 11
122	98	hsa-miR-30b-5p	219790	RTKN2	NM_145307	rhotekin 2
123	98	hsa-miR-30b-5p	121601	ANO4	NM_001286616	anoctamin 4
124	98	hsa-miR-30b-5p	51809	GALNT7	NM_017423	polypeptide N-acetylgalactosaminyltransferase 7
125	98	hsa-miR-30b-5p	4734	NEDD4	NM_001284338	neural precursor cell expressed, developmentally down-regulated 4, E3 ubiquitin protein ligase
126	98	hsa-miR-30b-5p	4919	ROR1	NM_005012	receptor tyrosine kinase like orphan receptor 1
127	98	hsa-miR-30b-5p	55432	YOD1	NM_001276320	YOD1 deubiquitinase
128	98	hsa-miR-30b-5p	1105	CHD1	NM_001270	chromodomain helicase DNA binding protein 1
129	98	hsa-miR-30b-5p	85397	RGS8	NM_001102450	regulator of G protein signaling 8
130	98	hsa-miR-30b-5p	1591	CYP24A1	NM_000782	cytochrome P450 family 24 subfamily A member 1
131	98	hsa-miR-30b-5p	64327	LMBR1	NM_022458	limb development membrane protein 1
132	98	hsa-miR-30b-5p	23504	RIMBP2	NM_015347	RIMS binding protein 2
133	98	hsa-miR-30b-5p	51465	UBE2J1	NM_016021	ubiquitin conjugating enzyme E2 J1
134	98	hsa-miR-30b-5p	375449	MAST4	NM_001297651	microtubule associated serine/threonine kinase family member 4
135	98	hsa-miR-30b-5p	51555	PEX5L	NM_001256750	peroxisomal biogenesis factor 5 like
136	98	hsa-miR-30b-5p	92140	MTDH	NM_178812	metadherin
137	98	hsa-miR-30b-5p	84937	ZNRF1	NM_032268	zinc and ring finger 1
138	98	hsa-miR-30b-5p	2560	GABRB1	NM_000812	gamma-aminobutyric acid type A receptor beta1 subunit
139	98	hsa-miR-30b-5p	403313	PLPP6	NM_203453	phospholipid phosphatase 6
140	98	hsa-miR-30b-5p	10752	CHL1	NM_001253387	cell adhesion molecule L1 like
141	98	hsa-miR-30b-5p	112574	SNX18	NM_001145427	sorting nexin 18
142	98	hsa-miR-30b-5p	57583	TMEM181	NM_020823	transmembrane protein 181
143	98	hsa-miR-30b-5p	9890	PLPPR4	NM_001166252	phospholipid phosphatase related 4
144	98	hsa-miR-30b-5p	55716	LMBR1L	NM_001300750	limb development membrane protein 1 like
145	98	hsa-miR-30b-5p	5783	PTPN13	NM_006264	protein tyrosine phosphatase, non-receptor type 13
146	98	hsa-miR-30b-5p	29915	HCFC2	NM_013320	host cell factor C2
147	98	hsa-miR-30b-5p	9734	HDAC9	NM_178425	histone deacetylase 9
148	98	hsa-miR-30b-5p	56999	ADAMTS9	NM_001318781	ADAM metallopeptidase with thrombospondin type 1 motif 9
149	98	hsa-miR-30b-5p	254048	UBN2	NM_173569	ubinuclein 2
150	98	hsa-miR-30b-5p	150	ADRA2A	NM_000681	adrenoceptor alpha 2A
151	98	hsa-miR-30b-5p	51029	DESI2	NM_001297746	desumoylating isopeptidase 2
152	98	hsa-miR-30b-5p	5326	PLAGL2	NM_002657	PLAG1 like zinc finger 2
153	98	hsa-miR-30b-5p	2487	FRZB	NM_001463	frizzled related protein
154	98	hsa-miR-103a-3p	79572	ATP13A3	NM_024524	ATPase 13A3
155	98	hsa-miR-103a-3p	9683	N4BP1	NM_153029	NEDD4 binding protein 1
156	98	hsa-miR-103a-3p	5756	TWF1	NM_001242397	twinfilin actin binding protein 1
157	98	hsa-miR-103a-3p	8313	AXIN2	NM_004655	axin 2
158	98	hsa-miR-103a-3p	51499	TRIAP1	NM_016399	TP53 regulated inhibitor of apoptosis 1
159	98	hsa-miR-103a-3p	9949	AMMECR1	NM_001025580	Alport syndrome, mental retardation, midface hypoplasia and elliptocytosis chromosomal region gene 1
160	98	hsa-miR-103a-3p	54861	SNRK	NM_001100594	SNF related kinase
161	98	hsa-miR-103a-3p	55294	FBXW7	NM_033632	F-box and WD repeat domain containing 7
162	98	hsa-let-7a-5p	23119	HIC2	NM_015094	HIC ZBTB transcriptional repressor 2
163	98	hsa-let-7a-5p	4673	NAP1L1	NM_004537	nucleosome assembly protein 1 like 1
164	98	hsa-let-7a-5p	10857	PGRMC1	NM_006667	progesterone receptor membrane component 1
165	98	hsa-let-7a-5p	23468	CBX5	NM_001127321	chromobox 5
166	98	hsa-let-7a-5p	894	CCND2	NM_001759	cyclin D2
167	98	hsa-miR-320a-3p	65056	GPBP1	NM_001203246	GC-rich promoter binding protein 1
168	98	hsa-miR-320a-3p	2641	GCG	NM_002054	glucagon
169	98	hsa-miR-320a-3p	22866	CNKSR2	NM_001168647	connector enhancer of kinase suppressor of Ras 2
170	98	hsa-miR-320a-3p	6392	SDHD	NM_001276506	succinate dehydrogenase complex subunit D
171	98	hsa-miR-320a-3p	143279	HECTD2	NM_001284274	HECT domain E3 ubiquitin protein ligase 2
172	98	hsa-miR-338-3p	867	CBL	NM_005188	Cbl proto-oncogene
173	98	hsa-miR-374b-5p	55784	MCTP2	NM_001159643	multiple C2 and transmembrane domain containing 2
174	98	hsa-miR-374b-5p	196	AHR	NM_001621	aryl hydrocarbon receptor
175	98	hsa-miR-374b-5p	1051	CEBPB	NM_001285878	CCAAT enhancer binding protein beta
176	98	hsa-miR-374b-5p	6867	TACC1	NM_006283	transforming acidic coiled-coil containing protein 1
177	98	hsa-miR-374b-5p	285671	RNF180	NM_001113561	ring finger protein 180
178	98	hsa-miR-374b-5p	57688	ZSWIM6	NM_020928	zinc finger SWIM-type containing 6
179	98	hsa-miR-374b-5p	91057	CCDC34	NM_080654	coiled-coil domain containing 34
180	98	hsa-miR-374b-5p	6095	RORA	NM_002943	RAR related orphan receptor A
181	98	hsa-miR-374b-5p	23305	ACSL6	NM_001009185	acyl-CoA synthetase long chain family member 6
182	98	hsa-miR-374b-5p	152559	PAQR3	NM_001040202	progestin and adipoQ receptor family member 3
183	97	hsa-miR-142-3p	6780	STAU1	NM_001037328	staufen double-stranded RNA binding protein 1
184	97	hsa-miR-107	221662	RBM24	NM_001143941	RNA binding motif protein 24
185	97	hsa-miR-107	9832	JAKMIP2	NM_001270934	janus kinase and microtubule interacting protein 2
186	97	hsa-miR-107	6249	CLIP1	NM_001247997	CAP-Gly domain containing linker protein 1
187	97	hsa-miR-107	9575	CLOCK	NM_001267843	clock circadian regulator
188	97	hsa-miR-107	9783	RIMS3	NM_014747	regulating synaptic membrane exocytosis 3
189	97	hsa-miR-107	22849	CPEB3	NM_001178137	cytoplasmic polyadenylation element binding protein 3
190	97	hsa-miR-30b-5p	55209	SETD5	NM_001080517	SET domain containing 5
191	97	hsa-miR-30b-5p	23613	ZMYND8	NM_001281781	zinc finger MYND-type containing 8
192	97	hsa-miR-30b-5p	167153	TENT2	NM_001114394	terminal nucleotidyltransferase 2
193	97	hsa-miR-30b-5p	50859	SPOCK3	NM_001040159	SPARC (osteonectin), cwcv and kazal like domains proteoglycan 3
194	97	hsa-miR-30b-5p	51164	DCTN4	NM_001135643	dynactin subunit 4
195	97	hsa-miR-30b-5p	2191	FAP	NM_001291807	fibroblast activation protein alpha
196	97	hsa-miR-30b-5p	2009	EML1	NM_001008707	EMAP like 1
197	97	hsa-miR-30b-5p	3705	ITPK1	NM_001142593	inositol-tetrakisphosphate 1-kinase
198	97	hsa-miR-30b-5p	861	RUNX1	NM_001001890	runt related transcription factor 1
199	97	hsa-miR-30b-5p	2290	FOXG1	NM_005249	forkhead box G1
200	97	hsa-miR-30b-5p	27347	STK39	NM_013233	serine/threonine kinase 39
201	97	hsa-miR-30b-5p	23443	SLC35A3	NM_012243	solute carrier family 35 member A3
202	97	hsa-miR-30b-5p	7071	KLF10	NM_001032282	Kruppel like factor 10
203	97	hsa-miR-30b-5p	4781	NFIB	NM_001190737	nuclear factor I B
204	97	hsa-miR-30b-5p	23013	SPEN	NM_015001	spen family transcriptional repressor
205	97	hsa-miR-30b-5p	100113407	TMEM170B	NM_001100829	transmembrane protein 170B
206	97	hsa-miR-30b-5p	10019	SH2B3	NM_005475	SH2B adaptor protein 3
207	97	hsa-miR-30b-5p	9508	ADAMTS3	NM_014243	ADAM metallopeptidase with thrombospondin type 1 motif 3
208	97	hsa-miR-30b-5p	25977	NECAP1	NM_015509	NECAP endocytosis associated 1
209	97	hsa-miR-30b-5p	57157	PHTF2	NM_001127357	putative homeodomain transcription factor 2
210	97	hsa-miR-30b-5p	57171	DOLPP1	NM_001135917	dolichyldiphosphatase 1
211	97	hsa-miR-30b-5p	10802	SEC24A	NM_021982	SEC24 homolog A, COPII coat complex component
212	97	hsa-miR-30b-5p	253943	YTHDF3	NM_001277813	YTH N6-methyladenosine RNA binding protein 3
213	97	hsa-miR-30b-5p	388403	YPEL2	NM_001005404	yippee like 2
214	97	hsa-miR-30b-5p	57700	FAM160B1	NM_020940	family with sequence similarity 160 member B1
215	97	hsa-miR-30b-5p	7093	TLL2	NM_012465	tolloid like 2
216	97	hsa-miR-30b-5p	144455	E2F7	NM_203394	E2F transcription factor 7
217	97	hsa-miR-30b-5p	79800	CARF	NM_001104586	calcium responsive transcription factor
218	97	hsa-miR-30b-5p	5504	PPP1R2	NM_001316325	protein phosphatase 1 regulatory inhibitor subunit 2
219	97	hsa-miR-30b-5p	6662	SOX9	NM_000346	SRY-box 9
220	97	hsa-miR-30b-5p	6328	SCN3A	NM_006922	sodium voltage-gated channel alpha subunit 3
221	97	hsa-miR-30b-5p	9140	ATG12	NM_001277783	autophagy related 12
222	97	hsa-miR-30b-5p	5534	PPP3R1	NM_000945	protein phosphatase 3 regulatory subunit B, alpha
223	97	hsa-miR-30b-5p	23043	TNIK	NM_001161560	TRAF2 and NCK interacting kinase
224	97	hsa-miR-30b-5p	7803	PTP4A1	NM_003463	protein tyrosine phosphatase type IVA, member 1
225	97	hsa-miR-30b-5p	221035	REEP3	NM_001001330	receptor accessory protein 3
226	97	hsa-miR-30b-5p	7431	VIM	NM_003380	vimentin
227	97	hsa-miR-30b-5p	2135	EXTL2	NM_001261442	exostosin like glycosyltransferase 2
228	97	hsa-miR-30b-5p	140901	STK35	NM_080836	serine/threonine kinase 35
229	97	hsa-miR-30b-5p	653857	ACTR3C	NM_001164459	ARP3 actin related protein 3 homolog C
230	97	hsa-miR-30b-5p	57620	STIM2	NM_001169117	stromal interaction molecule 2
231	97	hsa-miR-103a-3p	221662	RBM24	NM_001143941	RNA binding motif protein 24
232	97	hsa-miR-103a-3p	9832	JAKMIP2	NM_001270934	janus kinase and microtubule interacting protein 2
233	97	hsa-miR-103a-3p	6249	CLIP1	NM_001247997	CAP-Gly domain containing linker protein 1
234	97	hsa-miR-103a-3p	9575	CLOCK	NM_001267843	clock circadian regulator
235	97	hsa-miR-103a-3p	9783	RIMS3	NM_014747	regulating synaptic membrane exocytosis 3
236	97	hsa-miR-103a-3p	22849	CPEB3	NM_001178137	cytoplasmic polyadenylation element binding protein 3
237	97	hsa-let-7a-5p	10201	NME6	NM_001308431	NME/NM23 nucleoside diphosphate kinase 6
238	97	hsa-let-7a-5p	55719	SLF2	NM_018121	SMC5-SMC6 complex localization factor 2
239	97	hsa-let-7a-5p	57167	SALL4	NM_001318031	spalt like transcription factor 4
240	97	hsa-let-7a-5p	170689	ADAMTS15	NM_139055	ADAM metallopeptidase with thrombospondin type 1 motif 15
241	97	hsa-let-7a-5p	57534	MIB1	NM_020774	mindbomb E3 ubiquitin protein ligase 1
242	97	hsa-let-7a-5p	5069	PAPPA	NM_002581	pappalysin 1
243	97	hsa-let-7a-5p	997	CDC34	NM_004359	cell division cycle 34
244	97	hsa-let-7a-5p	84068	SLC10A7	NM_001300842	solute carrier family 10 member 7
245	97	hsa-let-7a-5p	51460	SFMBT1	NM_016329	Scm like with four mbt domains 1
246	97	hsa-let-7a-5p	121227	LRIG3	NM_001136051	leucine rich repeats and immunoglobulin like domains 3
247	97	hsa-let-7a-5p	57473	ZNF512B	NM_020713	zinc finger protein 512B
248	97	hsa-miR-320a-3p	7021	TFAP2B	NM_003221	transcription factor AP-2 beta
249	97	hsa-miR-320a-3p	66000	TMEM108	NM_001136469	transmembrane protein 108
250	97	hsa-miR-320a-3p	3688	ITGB1	NM_033668	integrin subunit beta 1
251	97	hsa-miR-320a-3p	7533	YWHAH	NM_003405	tyrosine 3-monooxygenase/tryptophan 5-monooxygenase activation protein eta
252	97	hsa-miR-320a-3p	10087	COL4A3BP	NM_001130105	collagen type IV alpha 3 binding protein
253	97	hsa-miR-320a-3p	55916	NXT2	NM_001242617	nuclear transport factor 2 like export factor 2
254	97	hsa-miR-320a-3p	10904	BLCAP	NM_006698	BLCAP, apoptosis inducing factor
255	97	hsa-miR-320a-3p	54629	MINDY2	NM_001040453	MINDY lysine 48 deubiquitinase 2
256	97	hsa-miR-320a-3p	55802	DCP1A	NM_001290204	decapping mRNA 1A
257	97	hsa-miR-320a-3p	57532	NUFIP2	NM_020772	nuclear FMR1 interacting protein 2
258	97	hsa-miR-338-3p	29094	LGALSL	NM_014181	galectin like
259	97	hsa-miR-374b-5p	283078	MKX	NM_001242702	mohawk homeobox
260	97	hsa-miR-374b-5p	66000	TMEM108	NM_001136469	transmembrane protein 108
261	97	hsa-miR-374b-5p	2566	GABRG2	NM_000816	gamma-aminobutyric acid type A receptor gamma2 subunit
262	97	hsa-miR-374b-5p	5638	PRRG1	NM_000950	proline rich and Gla domain 1
263	97	hsa-miR-374b-5p	4323	MMP14	NM_004995	matrix metallopeptidase 14
264	97	hsa-miR-374b-5p	222008	VSTM2A	NM_001317843	V-set and transmembrane domain containing 2A
265	97	hsa-miR-374b-5p	23731	TMEM245	NM_032012	transmembrane protein 245
266	97	hsa-miR-374b-5p	346389	MACC1	NM_182762	MET transcriptional regulator MACC1
267	96	hsa-miR-151a-5p	7404	UTY	NM_001258269	ubiquitously transcribed tetratricopeptide repeat containing, Y-linked
268	96	hsa-miR-142-3p	25943	C20orf194	NM_001009984	chromosome 20 open reading frame 194
269	96	hsa-miR-142-3p	360023	ZBTB41	NM_194314	zinc finger and BTB domain containing 41
270	96	hsa-miR-142-3p	84255	SLC37A3	NM_001287498	solute carrier family 37 member 3
271	96	hsa-miR-142-3p	3696	ITGB8	NM_002214	integrin subunit beta 8
272	96	hsa-miR-142-3p	91272	BOD1	NM_138369	biorientation of chromosomes in cell division 1
273	96	hsa-miR-142-3p	114793	FMNL2	NM_052905	formin like 2
274	96	hsa-miR-142-3p	84925	SLC49A4	NM_032839	solute carrier family 49 member 4
275	96	hsa-miR-107	4209	MEF2D	NM_001271629	myocyte enhancer factor 2D
276	96	hsa-miR-107	59338	PLEKHA1	NM_001195608	pleckstrin homology domain containing A1
277	96	hsa-miR-107	9493	KIF23	NM_001281301	kinesin family member 23
278	96	hsa-miR-107	23262	PPIP5K2	NM_001276277	diphosphoinositol pentakisphosphate kinase 2
279	96	hsa-miR-107	4627	MYH9	NM_002473	myosin heavy chain 9
280	96	hsa-miR-107	3376	IARS	NM_002161	isoleucyl-tRNA synthetase
281	96	hsa-miR-107	4763	NF1	NM_000267	neurofibromin 1
282	96	hsa-miR-107	10762	NUP50	NM_007172	nucleoporin 50
283	96	hsa-miR-107	154796	AMOT	NM_001113490	angiomotin
284	96	hsa-miR-107	23112	TNRC6B	NM_001024843	trinucleotide repeat containing 6B
285	96	hsa-miR-107	9701	PPP6R2	NM_001242900	protein phosphatase 6 regulatory subunit 2
286	96	hsa-miR-30b-5p	150275	CCDC117	NM_001284263	coiled-coil domain containing 117
287	96	hsa-miR-30b-5p	25953	PNKD	NM_015488	PNKD, MBL domain containing
288	96	hsa-miR-30b-5p	142891	SAMD8	NM_144660	sterile alpha motif domain containing 8
289	96	hsa-miR-30b-5p	200933	FBXO45	NM_001105573	F-box protein 45
290	96	hsa-miR-30b-5p	2800	GOLGA1	NM_002077	golgin A1
291	96	hsa-miR-30b-5p	389072	PLEKHM3	NM_001080475	pleckstrin homology domain containing M3
292	96	hsa-miR-30b-5p	51582	AZIN1	NM_001301668	antizyme inhibitor 1
293	96	hsa-miR-30b-5p	27107	ZBTB11	NM_014415	zinc finger and BTB domain containing 11
294	96	hsa-miR-30b-5p	55023	PHIP	NM_017934	pleckstrin homology domain interacting protein
295	96	hsa-miR-30b-5p	23576	DDAH1	NM_001134445	dimethylarginine dimethylaminohydrolase 1
296	96	hsa-miR-30b-5p	6432	SRSF7	NM_001031684	serine and arginine rich splicing factor 7
297	96	hsa-miR-30b-5p	79718	TBL1XR1	NM_001321193	transducin beta like 1 X-linked receptor 1
298	96	hsa-miR-30b-5p	53344	CHIC1	NM_001039840	cysteine rich hydrophobic domain 1
299	96	hsa-miR-30b-5p	3655	ITGA6	NM_000210	integrin subunit alpha 6
300	96	hsa-miR-30b-5p	9990	SLC12A6	NM_001042494	solute carrier family 12 member 6
301	96	hsa-miR-30b-5p	860	RUNX2	NM_001015051	runt related transcription factor 2
302	96	hsa-miR-30b-5p	51633	OTUD6B	NM_001286745	OTU domain containing 6B
303	96	hsa-miR-30b-5p	124808	CCDC43	NM_144609	coiled-coil domain containing 43
304	96	hsa-miR-30b-5p	55343	SLC35C1	NM_001145265	solute carrier family 35 member C1
305	96	hsa-miR-30b-5p	89795	NAV3	NM_001024383	neuron navigator 3
306	96	hsa-miR-30b-5p	51130	ASB3	NM_001201965	ankyrin repeat and SOCS box containing 3
307	96	hsa-miR-30b-5p	8651	SOCS1	NM_003745	suppressor of cytokine signaling 1
308	96	hsa-miR-30b-5p	9213	XPR1	NM_001135669	xenotropic and polytropic retrovirus receptor 1
309	96	hsa-miR-30b-5p	80301	PLEKHO2	NM_001195059	pleckstrin homology domain containing O2
310	96	hsa-miR-30b-5p	22866	CNKSR2	NM_001168647	connector enhancer of kinase suppressor of Ras 2
311	96	hsa-miR-30b-5p	905	CCNT2	NM_001241	cyclin T2
312	96	hsa-miR-30b-5p	64766	S100PBP	NM_022753	S100P binding protein
313	96	hsa-miR-30b-5p	8728	ADAM19	NM_033274	ADAM metallopeptidase domain 19
314	96	hsa-miR-30b-5p	10914	PAPOLA	NM_001252007	poly(A) polymerase alpha
315	96	hsa-miR-30b-5p	11278	KLF12	NM_007249	Kruppel like factor 12
316	96	hsa-miR-30b-5p	27436	EML4	NM_001145076	EMAP like 4
317	96	hsa-miR-30b-5p	5445	PON2	NM_000305	paraoxonase 2
318	96	hsa-miR-30b-5p	1073	CFL2	NM_001243645	cofilin 2
319	96	hsa-miR-30b-5p	9435	CHST2	NM_004267	carbohydrate sulfotransferase 2
320	96	hsa-miR-30b-5p	54882	ANKHD1	NM_017747	ankyrin repeat and KH domain containing 1
321	96	hsa-miR-30b-5p	9125	CNOT9	NM_001271634	CCR4-NOT transcription complex subunit 9
322	96	hsa-miR-103a-3p	4209	MEF2D	NM_001271629	myocyte enhancer factor 2D
323	96	hsa-miR-103a-3p	59338	PLEKHA1	NM_001195608	pleckstrin homology domain containing A1
324	96	hsa-miR-103a-3p	9493	KIF23	NM_001281301	kinesin family member 23
325	96	hsa-miR-103a-3p	23262	PPIP5K2	NM_001276277	diphosphoinositol pentakisphosphate kinase 2
326	96	hsa-miR-103a-3p	4627	MYH9	NM_002473	myosin heavy chain 9
327	96	hsa-miR-103a-3p	3376	IARS	NM_002161	isoleucyl-tRNA synthetase
328	96	hsa-miR-103a-3p	4763	NF1	NM_000267	neurofibromin 1
329	96	hsa-miR-103a-3p	10762	NUP50	NM_007172	nucleoporin 50
330	96	hsa-miR-103a-3p	154796	AMOT	NM_001113490	angiomotin
331	96	hsa-miR-103a-3p	23112	TNRC6B	NM_001024843	trinucleotide repeat containing 6B
332	96	hsa-miR-103a-3p	9701	PPP6R2	NM_001242900	protein phosphatase 6 regulatory subunit 2
333	96	hsa-let-7a-5p	4893	NRAS	NM_002524	NRAS proto-oncogene, GTPase
334	96	hsa-let-7a-5p	374655	ZNF710	NM_198526	zinc finger protein 710
335	96	hsa-let-7a-5p	7402	UTRN	NM_007124	utrophin
336	96	hsa-let-7a-5p	2787	GNG5	NM_005274	G protein subunit gamma 5
337	96	hsa-let-7a-5p	84919	PPP1R15B	NM_032833	protein phosphatase 1 regulatory subunit 15B
338	96	hsa-let-7a-5p	6498	SKIL	NM_001145097	SKI like proto-oncogene
339	96	hsa-let-7a-5p	84101	USP44	NM_001042403	ubiquitin specific peptidase 44
340	96	hsa-let-7a-5p	55432	YOD1	NM_001276320	YOD1 deubiquitinase
341	96	hsa-let-7a-5p	571	BACH1	NM_001186	BTB domain and CNC homolog 1
342	96	hsa-let-7a-5p	283464	GXYLT1	NM_001099650	glucoside xylosyltransferase 1
343	96	hsa-let-7a-5p	9926	LPGAT1	NM_001320808	lysophosphatidylglycerol acyltransferase 1
344	96	hsa-let-7a-5p	3480	IGF1R	NM_000875	insulin like growth factor 1 receptor
345	96	hsa-let-7a-5p	57643	ZSWIM5	NM_020883	zinc finger SWIM-type containing 5
346	96	hsa-let-7a-5p	10395	DLC1	NM_001164271	DLC1 Rho GTPase activating protein
347	96	hsa-let-7a-5p	54619	CCNJ	NM_019084	cyclin J
348	96	hsa-let-7a-5p	113791	PIK3IP1	NM_001135911	phosphoinositide-3-kinase interacting protein 1
349	96	hsa-let-7a-5p	9925	ZBTB5	NM_014872	zinc finger and BTB domain containing 5
350	96	hsa-let-7a-5p	6809	STX3	NM_004177	syntaxin 3
351	96	hsa-let-7a-5p	7976	FZD3	NM_017412	frizzled class receptor 3
352	96	hsa-miR-320a-3p	84945	ABHD13	NM_032859	abhydrolase domain containing 13
353	96	hsa-miR-320a-3p	23528	ZNF281	NM_001281293	zinc finger protein 281
354	96	hsa-miR-320a-3p	255967	PAN3	NM_175854	poly(A) specific ribonuclease subunit PAN3
355	96	hsa-miR-338-3p	51552	RAB14	NM_016322	RAB14, member RAS oncogene family
356	96	hsa-miR-338-3p	3739	KCNA4	NM_002233	potassium voltage-gated channel subfamily A member 4
357	96	hsa-miR-338-3p	80243	PREX2	NM_024870	phosphatidylinositol-3,4,5-trisphosphate dependent Rac exchange factor 2
358	96	hsa-miR-374b-5p	5308	PITX2	NM_001204398	paired like homeodomain 2
359	96	hsa-miR-374b-5p	753	LDLRAD4	NM_001003675	low density lipoprotein receptor class A domain containing 4
360	96	hsa-miR-374b-5p	55768	NGLY1	NM_001145295	N-glycanase 1
361	96	hsa-miR-374b-5p	3486	IGFBP3	NM_000598	insulin like growth factor binding protein 3
362	96	hsa-miR-374b-5p	132724	TMPRSS11B	NM_182502	transmembrane serine protease 11B
363	96	hsa-miR-374b-5p	23265	EXOC7	NM_001282314	exocyst complex component 7
364	95	hsa-miR-142-3p	7402	UTRN	NM_007124	utrophin
365	95	hsa-miR-142-3p	284352	PPP1R37	NM_019121	protein phosphatase 1 regulatory subunit 37
366	95	hsa-miR-142-3p	9069	CLDN12	NM_001185073	claudin 12
367	95	hsa-miR-142-3p	5863	RGL2	NM_001243738	ral guanine nucleotide dissociation stimulator like 2
368	95	hsa-miR-142-3p	23174	ZCCHC14	NM_015144	zinc finger CCHC-type containing 14
369	95	hsa-miR-142-3p	399474	TMEM200B	NM_001171868	transmembrane protein 200B
370	95	hsa-miR-142-3p	3685	ITGAV	NM_001144999	integrin subunit alpha V
371	95	hsa-miR-142-3p	4140	MARK3	NM_001128918	microtubule affinity regulating kinase 3
372	95	hsa-miR-142-3p	5007	OSBP	NM_002556	oxysterol binding protein
373	95	hsa-miR-107	84132	USP42	NM_032172	ubiquitin specific peptidase 42
374	95	hsa-miR-107	55156	ARMC1	NM_001286702	armadillo repeat containing 1
375	95	hsa-miR-107	152006	RNF38	NM_022781	ring finger protein 38
376	95	hsa-miR-107	27086	FOXP1	NM_001244813	forkhead box P1
377	95	hsa-miR-107	6326	SCN2A	NM_001040142	sodium voltage-gated channel alpha subunit 2
378	95	hsa-miR-107	11016	ATF7	NM_006856	activating transcription factor 7
379	95	hsa-miR-107	93	ACVR2B	NM_001106	activin A receptor type 2B
380	95	hsa-miR-107	65986	ZBTB10	NM_001105539	zinc finger and BTB domain containing 10
381	95	hsa-miR-107	53834	FGFRL1	NM_001004358	fibroblast growth factor receptor like 1
382	95	hsa-miR-107	2005	ELK4	NM_001973	ELK4, ETS transcription factor
383	95	hsa-miR-107	5775	PTPN4	NM_002830	protein tyrosine phosphatase, non-receptor type 4
384	95	hsa-miR-30b-5p	5922	RASA2	NM_001303245	RAS p21 protein activator 2
385	95	hsa-miR-30b-5p	5217	PFN2	NM_053024	profilin 2
386	95	hsa-miR-30b-5p	9117	SEC22C	NM_032970	SEC22 homolog C, vesicle trafficking protein
387	95	hsa-miR-30b-5p	148534	TMEM56	NM_001199679	transmembrane protein 56
388	95	hsa-miR-30b-5p	9021	SOCS3	NM_003955	suppressor of cytokine signaling 3
389	95	hsa-miR-30b-5p	6236	RRAD	NM_001128850	RRAD, Ras related glycolysis inhibitor and calcium channel regulator
390	95	hsa-miR-30b-5p	9231	DLG5	NM_004747	discs large MAGUK scaffold protein 5
391	95	hsa-miR-30b-5p	26057	ANKRD17	NM_001286771	ankyrin repeat domain 17
392	95	hsa-miR-30b-5p	9926	LPGAT1	NM_001320808	lysophosphatidylglycerol acyltransferase 1
393	95	hsa-miR-30b-5p	10299	MARCH6	NM_001270661	membrane associated ring-CH-type finger 6
394	95	hsa-miR-30b-5p	6495	SIX1	NM_005982	SIX homeobox 1
395	95	hsa-miR-30b-5p	22844	FRMPD1	NM_014907	FERM and PDZ domain containing 1
396	95	hsa-miR-30b-5p	8411	EEA1	NM_003566	early endosome antigen 1
397	95	hsa-miR-30b-5p	9575	CLOCK	NM_001267843	clock circadian regulator
398	95	hsa-miR-30b-5p	94241	TP53INP1	NM_001135733	tumor protein p53 inducible nuclear protein 1
399	95	hsa-miR-30b-5p	10484	SEC23A	NM_006364	Sec23 homolog A, coat complex II component
400	95	hsa-miR-30b-5p	80335	WDR82	NM_025222	WD repeat domain 82
401	95	hsa-miR-30b-5p	22877	MLXIP	NM_014938	MLX interacting protein
402	95	hsa-miR-30b-5p	4086	SMAD1	NM_001003688	SMAD family member 1
403	95	hsa-miR-30b-5p	1305	COL13A1	NM_001130103	collagen type XIII alpha 1 chain
404	95	hsa-miR-30b-5p	9729	KIAA0408	NM_014702	KIAA0408
405	95	hsa-miR-30b-5p	57826	RAP2C	NM_001271186	RAP2C, member of RAS oncogene family
406	95	hsa-miR-30b-5p	54877	ZCCHC2	NM_017742	zinc finger CCHC-type containing 2
407	95	hsa-miR-30b-5p	2287	FKBP3	NM_002013	FKBP prolyl isomerase 3
408	95	hsa-miR-30b-5p	26000	TBC1D10B	NM_015527	TBC1 domain family member 10B
409	95	hsa-miR-30b-5p	158471	PRUNE2	NM_015225	prune homolog 2 with BCH domain
410	95	hsa-miR-30b-5p	6769	STAC	NM_003149	SH3 and cysteine rich domain
411	95	hsa-miR-30b-5p	2054	STX2	NM_194356	syntaxin 2
412	95	hsa-miR-30b-5p	23774	BRD1	NM_001304808	bromodomain containing 1
413	95	hsa-miR-30b-5p	799	CALCR	NM_001164737	calcitonin receptor
414	95	hsa-miR-30b-5p	4223	MEOX2	NM_005924	mesenchyme homeobox 2
415	95	hsa-miR-30b-5p	23112	TNRC6B	NM_001024843	trinucleotide repeat containing 6B
416	95	hsa-miR-30b-5p	54492	NEURL1B	NM_001142651	neuralized E3 ubiquitin protein ligase 1B
417	95	hsa-miR-30b-5p	7336	UBE2V2	NM_003350	ubiquitin conjugating enzyme E2 V2
418	95	hsa-miR-30b-5p	27253	PCDH17	NM_001040429	protocadherin 17
419	95	hsa-miR-103a-3p	84132	USP42	NM_032172	ubiquitin specific peptidase 42
420	95	hsa-miR-103a-3p	55156	ARMC1	NM_001286702	armadillo repeat containing 1
421	95	hsa-miR-103a-3p	152006	RNF38	NM_022781	ring finger protein 38
422	95	hsa-miR-103a-3p	27086	FOXP1	NM_001244813	forkhead box P1
423	95	hsa-miR-103a-3p	6326	SCN2A	NM_001040142	sodium voltage-gated channel alpha subunit 2
424	95	hsa-miR-103a-3p	11016	ATF7	NM_006856	activating transcription factor 7
425	95	hsa-miR-103a-3p	93	ACVR2B	NM_001106	activin A receptor type 2B
426	95	hsa-miR-103a-3p	65986	ZBTB10	NM_001105539	zinc finger and BTB domain containing 10
427	95	hsa-miR-103a-3p	53834	FGFRL1	NM_001004358	fibroblast growth factor receptor like 1
428	95	hsa-miR-103a-3p	2005	ELK4	NM_001973	ELK4, ETS transcription factor
429	95	hsa-miR-103a-3p	5775	PTPN4	NM_002830	protein tyrosine phosphatase, non-receptor type 4
430	95	hsa-let-7a-5p	541565	C8orf58	NM_173686	chromosome 8 open reading frame 58
431	95	hsa-let-7a-5p	84146	ZNF644	NM_016620	zinc finger protein 644
432	95	hsa-let-7a-5p	85027	SMIM3	NM_032947	small integral membrane protein 3
433	95	hsa-let-7a-5p	9069	CLDN12	NM_001185072	claudin 12
434	95	hsa-let-7a-5p	222659	PXT1	NM_152990	peroxisomal testis enriched protein 1
435	95	hsa-let-7a-5p	348938	NIPAL4	NM_001099287	NIPA like domain containing 4
436	95	hsa-let-7a-5p	8161	COIL	NM_004645	coilin
437	95	hsa-let-7a-5p	192670	AGO4	NM_017629	argonaute RISC catalytic component 4
438	95	hsa-let-7a-5p	79158	GNPTAB	NM_024312	N-acetylglucosamine-1-phosphate transferase subunits alpha and beta
439	95	hsa-let-7a-5p	11095	ADAMTS8	NM_007037	ADAM metallopeptidase with thrombospondin type 1 motif 8
440	95	hsa-let-7a-5p	154	ADRB2	NM_000024	adrenoceptor beta 2
441	95	hsa-let-7a-5p	7069	THRSP	NM_003251	thyroid hormone responsive
442	95	hsa-let-7a-5p	200424	TET3	NM_001287491	tet methylcytosine dioxygenase 3
443	95	hsa-let-7a-5p	1184	CLCN5	NM_000084	chloride voltage-gated channel 5
444	95	hsa-let-7a-5p	8243	SMC1A	NM_001281463	structural maintenance of chromosomes 1A
445	95	hsa-let-7a-5p	1281	COL3A1	NM_000090	collagen type III alpha 1 chain
446	95	hsa-let-7a-5p	55909	BIN3	NM_018688	bridging integrator 3
447	95	hsa-miR-320a-3p	728492	SERF1B	NM_001178087	small EDRK-rich factor 1B
448	95	hsa-miR-320a-3p	10285	SMNDC1	NM_005871	survival motor neuron domain containing 1
449	95	hsa-miR-320a-3p	55207	ARL8B	NM_018184	ADP ribosylation factor like GTPase 8B
450	95	hsa-miR-320a-3p	4300	MLLT3	NM_001286691	MLLT3, super elongation complex subunit
451	95	hsa-miR-320a-3p	1362	CPD	NM_001199775	carboxypeptidase D
452	95	hsa-miR-320a-3p	10776	ARPP19	NM_001306191	cAMP regulated phosphoprotein 19
453	95	hsa-miR-320a-3p	10618	TGOLN2	NM_006464	trans-golgi network protein 2
454	95	hsa-miR-320a-3p	347730	LRRTM1	NM_178839	leucine rich repeat transmembrane neuronal 1
455	95	hsa-miR-320a-3p	92140	MTDH	NM_178812	metadherin
456	95	hsa-miR-320a-3p	8293	SERF1A	NM_022968	small EDRK-rich factor 1A
457	95	hsa-miR-320a-3p	80824	DUSP16	NM_030640	dual specificity phosphatase 16
458	95	hsa-miR-320a-3p	1939	EIF2D	NM_006893	eukaryotic translation initiation factor 2D
459	95	hsa-miR-320a-3p	9931	HELZ	NM_014877	helicase with zinc finger
460	95	hsa-miR-338-3p	23215	PRRC2C	NM_015172	proline rich coiled-coil 2C
461	95	hsa-miR-338-3p	6872	TAF1	NM_001286074	TATA-box binding protein associated factor 1
462	95	hsa-miR-338-3p	51592	TRIM33	NM_015906	tripartite motif containing 33
463	95	hsa-miR-374b-5p	3673	ITGA2	NM_002203	integrin subunit alpha 2
464	95	hsa-miR-374b-5p	1657	DMXL1	NM_001290322	Dmx like 1
465	95	hsa-miR-374b-5p	5142	PDE4B	NM_001037339	phosphodiesterase 4B
466	95	hsa-miR-374b-5p	176	ACAN	NM_001135	aggrecan
467	95	hsa-miR-374b-5p	7539	ZFP37	NM_001282515	ZFP37 zinc finger protein
468	95	hsa-miR-374b-5p	54806	AHI1	NM_017651	Abelson helper integration site 1
469	95	hsa-miR-374b-5p	29028	ATAD2	NM_014109	ATPase family, AAA domain containing 2
470	95	hsa-miR-374b-5p	51773	RSF1	NM_016578	remodeling and spacing factor 1
471	95	hsa-miR-374b-5p	10846	PDE10A	NM_006661	phosphodiesterase 10A
472	95	hsa-miR-374b-5p	55773	TBC1D23	NM_018309	TBC1 domain family member 23
473	95	hsa-miR-374b-5p	63973	NEUROG2	NM_024019	neurogenin 2
474	95	hsa-miR-374b-5p	201931	TMEM192	NM_001100389	transmembrane protein 192
475	95	hsa-miR-374b-5p	9135	RABEP1	NM_001291581	rabaptin, RAB GTPase binding effector protein 1
476	95	hsa-miR-374b-5p	6586	SLIT3	NM_001271946	slit guidance ligand 3
477	95	hsa-miR-374b-5p	1829	DSG2	NM_001943	desmoglein 2
1	100	hsa-miR-1-3p	51495	HACD3	NM_016395	3-hydroxyacyl-CoA dehydratase 3
2	100	hsa-miR-1-3p	23531	MMD	NM_012329	monocyte to macrophage differentiation associated
3	100	hsa-miR-1-3p	23446	SLC44A1	NM_080546	solute carrier family 44 member 1
4	100	hsa-let-7d-5p	90627	STARD13	NM_052851	StAR related lipid transfer domain containing 13
5	100	hsa-let-7d-5p	8091	HMGA2	NM_003483	high mobility group AT-hook 2
6	100	hsa-let-7d-5p	10642	IGF2BP1	NM_001160423	insulin like growth factor 2 mRNA binding protein 1
7	100	hsa-let-7d-5p	283659	PRTG	NM_173814	protogenin
8	100	hsa-let-7d-5p	389421	LIN28B	NM_001004317	lin-28 homolog B
9	100	hsa-let-7d-5p	131405	TRIM71	NM_001039111	tripartite motif containing 71
10	100	hsa-miR-130a-3p	6249	CLIP1	NM_001247997	CAP-Gly domain containing linker protein 1
11	100	hsa-miR-130a-3p	2697	GJA1	NM_000165	gap junction protein alpha 1
12	100	hsa-miR-130a-3p	64506	CPEB1	NM_001079533	cytoplasmic polyadenylation element binding protein 1
13	100	hsa-miR-130a-3p	122060	SLAIN1	NM_144595	SLAIN motif family member 1
14	100	hsa-miR-130a-3p	387640	SKIDA1	NM_207371	SKI/DACH domain containing 1
15	100	hsa-miR-320b	55432	YOD1	NM_001276320	YOD1 deubiquitinase
16	99	hsa-miR-140-5p	2037	EPB41L2	NM_001252660	erythrocyte membrane protein band 4.1 like 2
17	99	hsa-miR-140-5p	168850	ZNF800	NM_176814	zinc finger protein 800
18	99	hsa-miR-140-5p	4735	2002-09-01	NM_001321032	septin 2
19	99	hsa-miR-1-3p	5081	PAX7	NM_001135254	paired box 7
20	99	hsa-miR-1-3p	5218	CDK14	NM_001287135	cyclin dependent kinase 14
21	99	hsa-miR-1-3p	79974	CPED1	NM_024913	cadherin like and PC-esterase domain containing 1
22	99	hsa-miR-1-3p	201895	SMIM14	NM_001317896	small integral membrane protein 14
23	99	hsa-miR-1-3p	2697	GJA1	NM_000165	gap junction protein alpha 1
24	99	hsa-miR-1-3p	8407	TAGLN2	NM_001277223	transgelin 2
25	99	hsa-miR-1-3p	80351	TNKS2	NM_025235	tankyrase 2
26	99	hsa-miR-1-3p	23214	XPO6	NM_001270940	exportin 6
27	99	hsa-miR-1-3p	113263	GLCCI1	NM_138426	glucocorticoid induced 1
28	99	hsa-let-7d-5p	55137	FIGN	NM_001321825	fidgetin, microtubule severing factor
29	99	hsa-let-7d-5p	9543	IGDCC3	NM_004884	immunoglobulin superfamily DCC subclass member 3
30	99	hsa-let-7d-5p	56916	SMARCAD1	NM_001128429	SWI/SNF-related, matrix-associated actin-dependent regulator of chromatin, subfamily a, containing DEAD/H box 1
31	99	hsa-let-7d-5p	27031	NPHP3	NM_153240	nephrocystin 3
32	99	hsa-let-7d-5p	401720	FIGNL2	NM_001013690	fidgetin like 2
33	99	hsa-let-7d-5p	2649	NR6A1	NM_001278546	nuclear receptor subfamily 6 group A member 1
34	99	hsa-let-7d-5p	10620	ARID3B	NM_001307939	AT-rich interaction domain 3B
35	99	hsa-let-7d-5p	122525	C14orf28	NM_001017923	chromosome 14 open reading frame 28
36	99	hsa-let-7d-5p	23150	FRMD4B	NM_015123	FERM domain containing 4B
37	99	hsa-miR-143-3p	22846	VASH1	NM_014909	vasohibin 1
38	99	hsa-miR-143-3p	27	ABL2	NM_005158	ABL proto-oncogene 2, non-receptor tyrosine kinase
39	99	hsa-miR-143-3p	163486	DENND1B	NM_001195215	DENN domain containing 1B
40	99	hsa-miR-130a-3p	2099	ESR1	NM_000125	estrogen receptor 1
41	99	hsa-miR-130a-3p	90	ACVR1	NM_001105	activin A receptor type 1
42	99	hsa-miR-130a-3p	7248	TSC1	NM_001162426	TSC complex subunit 1
43	99	hsa-miR-130a-3p	9252	RPS6KA5	NM_001322227	ribosomal protein S6 kinase A5
44	99	hsa-miR-130a-3p	4194	MDM4	NM_001204172	MDM4, p53 regulator
45	99	hsa-miR-130a-3p	8609	KLF7	NM_001270942	Kruppel like factor 7
46	99	hsa-miR-130a-3p	3479	IGF1	NM_001111283	insulin like growth factor 1
47	99	hsa-miR-130a-3p	57826	RAP2C	NM_001271186	RAP2C, member of RAS oncogene family
48	99	hsa-miR-130a-3p	2182	ACSL4	NM_001318509	acyl-CoA synthetase long chain family member 4
49	99	hsa-miR-130a-3p	5291	PIK3CB	NM_001256045	phosphatidylinositol-4,5-bisphosphate 3-kinase catalytic subunit beta
50	99	hsa-miR-130a-3p	26137	ZBTB20	NM_001164342	zinc finger and BTB domain containing 20
51	99	hsa-miR-130a-3p	4603	MYBL1	NM_001080416	MYB proto-oncogene like 1
52	99	hsa-miR-125a-5p	90627	STARD13	NM_052851	StAR related lipid transfer domain containing 13
53	99	hsa-miR-125a-5p	158326	FREM1	NM_001177704	FRAS1 related extracellular matrix 1
54	99	hsa-miR-125a-5p	55671	PPP4R3A	NM_001284280	protein phosphatase 4 regulatory subunit 3A
55	99	hsa-miR-125a-5p	90427	BMF	NM_001003943	Bcl2 modifying factor
56	99	hsa-miR-125a-5p	2650	GCNT1	NM_001097633	glucosaminyl (N-acetyl) transferase 1
57	99	hsa-miR-125a-5p	79628	SH3TC2	NM_024577	SH3 domain and tetratricopeptide repeats 2
58	99	hsa-miR-125a-5p	619279	ZNF704	NM_001033723	zinc finger protein 704
59	99	hsa-miR-125a-5p	10620	ARID3B	NM_001307939	AT-rich interaction domain 3B
60	99	hsa-miR-320b	6792	CDKL5	NM_001323289	cyclin dependent kinase like 5
61	99	hsa-miR-320b	9480	ONECUT2	NM_004852	one cut homeobox 2
62	99	hsa-miR-320b	339745	SPOPL	NM_001001664	speckle type BTB/POZ protein like
63	99	hsa-miR-320b	10019	SH2B3	NM_005475	SH2B adaptor protein 3
64	99	hsa-miR-320b	54886	PLPPR1	NM_017753	phospholipid phosphatase related 1
65	99	hsa-miR-320b	4254	KITLG	NM_003994	KIT ligand
66	98	hsa-miR-140-5p	650	BMP2	NM_001200	bone morphogenetic protein 2
67	98	hsa-miR-1-3p	5756	TWF1	NM_001242397	twinfilin actin binding protein 1
68	98	hsa-miR-1-3p	6760	SS18	NM_001007559	SS18, nBAF chromatin remodeling complex subunit
69	98	hsa-miR-1-3p	6643	SNX2	NM_001278199	sorting nexin 2
70	98	hsa-miR-1-3p	57181	SLC39A10	NM_001127257	solute carrier family 39 member 10
71	98	hsa-miR-1-3p	23528	ZNF281	NM_001281293	zinc finger protein 281
72	98	hsa-miR-1-3p	51808	PHAX	NM_032177	phosphorylated adaptor for RNA export
73	98	hsa-miR-1-3p	30818	KCNIP3	NM_001034914	potassium voltage-gated channel interacting protein 3
74	98	hsa-miR-1-3p	23213	SULF1	NM_001128204	sulfatase 1
75	98	hsa-miR-1-3p	149420	PDIK1L	NM_001243532	PDLIM1 interacting kinase 1 like
76	98	hsa-let-7d-5p	5724	PTAFR	NM_000952	platelet activating factor receptor
77	98	hsa-let-7d-5p	4673	NAP1L1	NM_004537	nucleosome assembly protein 1 like 1
78	98	hsa-let-7d-5p	894	CCND2	NM_001759	cyclin D2
79	98	hsa-let-7d-5p	2628	GATM	NM_001321015	glycine amidinotransferase
80	98	hsa-miR-143-3p	124540	MSI2	NM_001322250	musashi RNA binding protein 2
81	98	hsa-miR-143-3p	9852	EPM2AIP1	NM_014805	EPM2A interacting protein 1
82	98	hsa-miR-143-3p	283464	GXYLT1	NM_001099650	glucoside xylosyltransferase 1
83	98	hsa-miR-143-3p	9445	ITM2B	NM_021999	integral membrane protein 2B
84	98	hsa-miR-130a-3p	1656	DDX6	NM_004397	DEAD-box helicase 6
85	98	hsa-miR-130a-3p	728215	FAM155A	NM_001080396	family with sequence similarity 155 member A
86	98	hsa-miR-130a-3p	84541	KBTBD8	NM_032505	kelch repeat and BTB domain containing 8
87	98	hsa-miR-130a-3p	10472	ZBTB18	NM_001278196	zinc finger and BTB domain containing 18
88	98	hsa-miR-130a-3p	9372	ZFYVE9	NM_004799	zinc finger FYVE-type containing 9
89	98	hsa-miR-130a-3p	79718	TBL1XR1	NM_001321193	transducin beta like 1 X-linked receptor 1
90	98	hsa-miR-130a-3p	29094	LGALSL	NM_014181	galectin like
91	98	hsa-miR-130a-3p	55054	ATG16L1	NM_001190266	autophagy related 16 like 1
92	98	hsa-miR-130a-3p	6738	RO60	NM_004600	Ro60, Y RNA binding protein
93	98	hsa-miR-130a-3p	8534	CHST1	NM_003654	carbohydrate sulfotransferase 1
94	98	hsa-miR-130a-3p	4204	MECP2	NM_004992	methyl-CpG binding protein 2
95	98	hsa-miR-130a-3p	2332	FMR1	NM_001185075	fragile X mental retardation 1
96	98	hsa-miR-130a-3p	57472	CNOT6	NM_001303241	CCR4-NOT transcription complex subunit 6
97	98	hsa-miR-130a-3p	6655	SOS2	NM_006939	SOS Ras/Rho guanine nucleotide exchange factor 2
98	98	hsa-miR-130a-3p	1783	DYNC1LI2	NM_001323955	dynein cytoplasmic 1 light intermediate chain 2
99	98	hsa-miR-130a-3p	9728	SECISBP2L	NM_001193489	SECIS binding protein 2 like
100	98	hsa-miR-125a-5p	51124	IER3IP1	NM_016097	immediate early response 3 interacting protein 1
101	98	hsa-miR-125a-5p	43	ACHE	NM_001302621	acetylcholinesterase (Cartwright blood group)
102	98	hsa-miR-125a-5p	8548	BLZF1	NM_001320973	basic leucine zipper nuclear factor 1
103	98	hsa-miR-320b	65056	GPBP1	NM_001203246	GC-rich promoter binding protein 1
104	98	hsa-miR-320b	2641	GCG	NM_002054	glucagon
105	98	hsa-miR-320b	22866	CNKSR2	NM_001168647	connector enhancer of kinase suppressor of Ras 2
106	98	hsa-miR-320b	6392	SDHD	NM_001276506	succinate dehydrogenase complex subunit D
107	98	hsa-miR-320b	143279	HECTD2	NM_001284274	HECT domain E3 ubiquitin protein ligase 2
108	97	hsa-miR-140-5p	687	KLF9	NM_001206	Kruppel like factor 9
109	97	hsa-miR-346	5230	PGK1	NM_000291	phosphoglycerate kinase 1
110	97	hsa-miR-1-3p	23603	CORO1C	NM_001105237	coronin 1C
111	97	hsa-miR-1-3p	7402	UTRN	NM_007124	utrophin
112	97	hsa-miR-1-3p	2539	G6PD	NM_000402	glucose-6-phosphate dehydrogenase
113	97	hsa-miR-1-3p	23023	TMCC1	NM_001128224	transmembrane and coiled-coil domain family 1
114	97	hsa-miR-1-3p	84068	SLC10A7	NM_001300842	solute carrier family 10 member 7
115	97	hsa-miR-1-3p	283554	GPR137C	NM_001099652	G protein-coupled receptor 137C
116	97	hsa-miR-1-3p	221938	MMD2	NM_001270375	monocyte to macrophage differentiation associated 2
117	97	hsa-miR-1-3p	84747	UNC119B	NM_001080533	unc-119 lipid binding chaperone B
118	97	hsa-miR-1-3p	10153	CEBPZ	NM_005760	CCAAT enhancer binding protein zeta
119	97	hsa-miR-1-3p	11076	TPPP	NM_007030	tubulin polymerization promoting protein
120	97	hsa-miR-1-3p	627	BDNF	NM_001143805	brain derived neurotrophic factor
121	97	hsa-miR-1-3p	4775	NFATC3	NM_004555	nuclear factor of activated T cells 3
122	97	hsa-let-7d-5p	23119	HIC2	NM_015094	HIC ZBTB transcriptional repressor 2
123	97	hsa-let-7d-5p	10201	NME6	NM_001308431	NME/NM23 nucleoside diphosphate kinase 6
124	97	hsa-let-7d-5p	55719	SLF2	NM_018121	SMC5-SMC6 complex localization factor 2
125	97	hsa-let-7d-5p	57167	SALL4	NM_001318031	spalt like transcription factor 4
126	97	hsa-let-7d-5p	170689	ADAMTS15	NM_139055	ADAM metallopeptidase with thrombospondin type 1 motif 15
127	97	hsa-let-7d-5p	57534	MIB1	NM_020774	mindbomb E3 ubiquitin protein ligase 1
128	97	hsa-let-7d-5p	84068	SLC10A7	NM_001300842	solute carrier family 10 member 7
129	97	hsa-let-7d-5p	51460	SFMBT1	NM_016329	Scm like with four mbt domains 1
130	97	hsa-let-7d-5p	121227	LRIG3	NM_001136051	leucine rich repeats and immunoglobulin like domains 3
131	97	hsa-let-7d-5p	10857	PGRMC1	NM_006667	progesterone receptor membrane component 1
132	97	hsa-let-7d-5p	23468	CBX5	NM_001127321	chromobox 5
133	97	hsa-let-7d-5p	57473	ZNF512B	NM_020713	zinc finger protein 512B
134	97	hsa-miR-143-3p	3488	IGFBP5	NM_000599	insulin like growth factor binding protein 5
135	97	hsa-miR-143-3p	4646	MYO6	NM_001300899	myosin VI
136	97	hsa-miR-143-3p	29068	ZBTB44	NM_014155	zinc finger and BTB domain containing 44
137	97	hsa-miR-143-3p	11214	AKAP13	NM_001270546	A-kinase anchoring protein 13
138	97	hsa-miR-130a-3p	64393	ZMAT3	NM_022470	zinc finger matrin-type 3
139	97	hsa-miR-130a-3p	55638	SYBU	NM_001099746	syntabulin
140	97	hsa-miR-130a-3p	10955	SERINC3	NM_006811	serine incorporator 3
141	97	hsa-miR-130a-3p	10194	TSHZ1	NM_001308210	teashirt zinc finger homeobox 1
142	97	hsa-miR-130a-3p	23341	DNAJC16	NM_001287811	DnaJ heat shock protein family (Hsp40) member C16
143	97	hsa-miR-130a-3p	152006	RNF38	NM_022781	ring finger protein 38
144	97	hsa-miR-130a-3p	79836	LONRF3	NM_001289109	LON peptidase N-terminal domain and ring finger 3
145	97	hsa-miR-130a-3p	54842	MFSD6	NM_017694	major facilitator superfamily domain containing 6
146	97	hsa-miR-130a-3p	9678	PHF14	NM_014660	PHD finger protein 14
147	97	hsa-miR-130a-3p	192670	AGO4	NM_017629	argonaute RISC catalytic component 4
148	97	hsa-miR-130a-3p	26038	CHD5	NM_015557	chromodomain helicase DNA binding protein 5
149	97	hsa-miR-130a-3p	116984	ARAP2	NM_015230	ArfGAP with RhoGAP domain, ankyrin repeat and PH domain 2
150	97	hsa-miR-130a-3p	23097	CDK19	NM_001300960	cyclin dependent kinase 19
151	97	hsa-miR-130a-3p	26018	LRIG1	NM_015541	leucine rich repeats and immunoglobulin like domains 1
152	97	hsa-miR-130a-3p	57659	ZBTB4	NM_001128833	zinc finger and BTB domain containing 4
153	97	hsa-miR-130a-3p	2069	EREG	NM_001432	epiregulin
154	97	hsa-miR-130a-3p	8526	DGKE	NM_003647	diacylglycerol kinase epsilon
155	97	hsa-miR-130a-3p	51230	PHF20	NM_016436	PHD finger protein 20
156	97	hsa-miR-130a-3p	22848	AAK1	NM_014911	AP2 associated kinase 1
157	97	hsa-miR-130a-3p	51072	MEMO1	NM_001137602	mediator of cell motility 1
158	97	hsa-miR-125a-5p	23225	NUP210	NM_024923	nucleoporin 210
159	97	hsa-miR-125a-5p	578	BAK1	NM_001188	BCL2 antagonist/killer 1
160	97	hsa-miR-125a-5p	65084	TMEM135	NM_001168724	transmembrane protein 135
161	97	hsa-miR-125a-5p	348938	NIPAL4	NM_001099287	NIPA like domain containing 4
162	97	hsa-miR-125a-5p	23218	NBEAL2	NM_015175	neurobeachin like 2
163	97	hsa-miR-125a-5p	3662	IRF4	NM_001195286	interferon regulatory factor 4
164	97	hsa-miR-125a-5p	54207	KCNK10	NM_021161	potassium two pore domain channel subfamily K member 10
165	97	hsa-miR-125a-5p	3790	KCNS3	NM_001282428	potassium voltage-gated channel modifier subfamily S member 3
166	97	hsa-miR-125a-5p	1795	DOCK3	NM_004947	dedicator of cytokinesis 3
167	97	hsa-miR-125a-5p	51621	KLF13	NM_015995	Kruppel like factor 13
168	97	hsa-miR-125a-5p	57530	CGN	NM_020770	cingulin
169	97	hsa-miR-125a-5p	6095	RORA	NM_002943	RAR related orphan receptor A
170	97	hsa-miR-320b	7021	TFAP2B	NM_003221	transcription factor AP-2 beta
171	97	hsa-miR-320b	66000	TMEM108	NM_001136469	transmembrane protein 108
172	97	hsa-miR-320b	3688	ITGB1	NM_033668	integrin subunit beta 1
173	97	hsa-miR-320b	7533	YWHAH	NM_003405	tyrosine 3-monooxygenase/tryptophan 5-monooxygenase activation protein eta
174	97	hsa-miR-320b	10087	COL4A3BP	NM_001130105	collagen type IV alpha 3 binding protein
175	97	hsa-miR-320b	55916	NXT2	NM_001242617	nuclear transport factor 2 like export factor 2
176	97	hsa-miR-320b	10904	BLCAP	NM_006698	BLCAP, apoptosis inducing factor
177	97	hsa-miR-320b	54629	MINDY2	NM_001040453	MINDY lysine 48 deubiquitinase 2
178	97	hsa-miR-320b	55802	DCP1A	NM_001290204	decapping mRNA 1A
179	97	hsa-miR-320b	57532	NUFIP2	NM_020772	nuclear FMR1 interacting protein 2
180	96	hsa-miR-140-5p	23531	MMD	NM_012329	monocyte to macrophage differentiation associated
181	96	hsa-miR-140-5p	823	CAPN1	NM_001198868	calpain 1
182	96	hsa-miR-140-5p	639	PRDM1	NM_001198	PR/SET domain 1
183	96	hsa-miR-346	30010	NXPH1	NM_152745	neurexophilin 1
184	96	hsa-miR-1-3p	5077	PAX3	NM_001127366	paired box 3
185	96	hsa-miR-1-3p	27250	PDCD4	NM_001199492	programmed cell death 4
186	96	hsa-miR-1-3p	27086	FOXP1	NM_001244813	forkhead box P1
187	96	hsa-miR-1-3p	7994	KAT6A	NM_006766	lysine acetyltransferase 6A
188	96	hsa-miR-1-3p	27095	TRAPPC3	NM_001270894	trafficking protein particle complex 3
189	96	hsa-miR-1-3p	103	ADAR	NM_001025107	adenosine deaminase, RNA specific
190	96	hsa-miR-1-3p	79886	CAAP1	NM_001167575	caspase activity and apoptosis inhibitor 1
191	96	hsa-miR-1-3p	399665	FAM102A	NM_001035254	family with sequence similarity 102 member A
192	96	hsa-miR-1-3p	56262	LRRC8A	NM_001127244	leucine rich repeat containing 8 VRAC subunit A
193	96	hsa-miR-1-3p	285636	C5orf51	NM_175921	chromosome 5 open reading frame 51
194	96	hsa-miR-1-3p	23201	FAM168A	NM_001286050	family with sequence similarity 168 member A
195	96	hsa-miR-1-3p	164	AP1G1	NM_001030007	adaptor related protein complex 1 subunit gamma 1
196	96	hsa-miR-1-3p	55916	NXT2	NM_018698	nuclear transport factor 2 like export factor 2
197	96	hsa-miR-1-3p	3796	KIF2A	NM_001098511	kinesin family member 2A
198	96	hsa-miR-1-3p	11235	PDCD10	NM_145859	programmed cell death 10
199	96	hsa-let-7d-5p	4893	NRAS	NM_002524	NRAS proto-oncogene, GTPase
200	96	hsa-let-7d-5p	374655	ZNF710	NM_198526	zinc finger protein 710
201	96	hsa-let-7d-5p	7402	UTRN	NM_007124	utrophin
202	96	hsa-let-7d-5p	2787	GNG5	NM_005274	G protein subunit gamma 5
203	96	hsa-let-7d-5p	84101	USP44	NM_001042403	ubiquitin specific peptidase 44
204	96	hsa-let-7d-5p	5069	PAPPA	NM_002581	pappalysin 1
205	96	hsa-let-7d-5p	9926	LPGAT1	NM_001320808	lysophosphatidylglycerol acyltransferase 1
206	96	hsa-let-7d-5p	997	CDC34	NM_004359	cell division cycle 34
207	96	hsa-let-7d-5p	54619	CCNJ	NM_019084	cyclin J
208	96	hsa-let-7d-5p	9925	ZBTB5	NM_014872	zinc finger and BTB domain containing 5
209	96	hsa-let-7d-5p	7976	FZD3	NM_017412	frizzled class receptor 3
210	96	hsa-miR-28-5p	64759	TNS3	NM_022748	tensin 3
211	96	hsa-miR-143-3p	55616	ASAP3	NM_001143778	ArfGAP with SH3 domain, ankyrin repeat and PH domain 3
212	96	hsa-miR-143-3p	23198	PSME4	NM_014614	proteasome activator subunit 4
213	96	hsa-miR-143-3p	10768	AHCYL1	NM_001242673	adenosylhomocysteinase like 1
214	96	hsa-miR-143-3p	9201	DCLK1	NM_001195415	doublecortin like kinase 1
215	96	hsa-miR-130a-3p	81846	SBF2	NM_030962	SET binding factor 2
216	96	hsa-miR-130a-3p	7222	TRPC3	NM_001130698	transient receptor potential cation channel subfamily C member 3
217	96	hsa-miR-130a-3p	4065	LY75	NM_002349	lymphocyte antigen 75
218	96	hsa-miR-130a-3p	29969	MDFIC	NM_001166345	MyoD family inhibitor domain containing
219	96	hsa-miR-130a-3p	23236	PLCB1	NM_182734	phospholipase C beta 1
220	96	hsa-miR-130a-3p	4302	MLLT6	NM_005937	MLLT6, PHD finger containing
221	96	hsa-miR-130a-3p	137492	VPS37A	NM_001145152	VPS37A, ESCRT-I subunit
222	96	hsa-miR-130a-3p	10198	MPHOSPH9	NM_022782	M-phase phosphoprotein 9
223	96	hsa-miR-130a-3p	5594	MAPK1	NM_002745	mitogen-activated protein kinase 1
224	96	hsa-miR-130a-3p	65981	CAPRIN2	NM_001206856	caprin family member 2
225	96	hsa-miR-130a-3p	3622	ING2	NM_001291959	inhibitor of growth family member 2
226	96	hsa-miR-130a-3p	6533	SLC6A6	NM_001134367	solute carrier family 6 member 6
227	96	hsa-miR-130a-3p	59084	ENPP5	NM_001290072	ectonucleotide pyrophosphatase/phosphodiesterase 5 (putative)
228	96	hsa-miR-130a-3p	3251	HPRT1	NM_000194	hypoxanthine phosphoribosyltransferase 1
229	96	hsa-miR-130a-3p	151963	MB21D2	NM_178496	Mab-21 domain containing 2
230	96	hsa-miR-130a-3p	254251	LCORL	NM_001166139	ligand dependent nuclear receptor corepressor like
231	96	hsa-miR-130a-3p	3949	LDLR	NM_000527	low density lipoprotein receptor
232	96	hsa-miR-130a-3p	55103	RALGPS2	NM_152663	Ral GEF with PH domain and SH3 binding motif 2
233	96	hsa-miR-130a-3p	29915	HCFC2	NM_013320	host cell factor C2
234	96	hsa-miR-130a-3p	54014	BRWD1	NM_033656	bromodomain and WD repeat domain containing 1
235	96	hsa-miR-130a-3p	57708	MIER1	NM_001077700	MIER1 transcriptional regulator
236	96	hsa-miR-130a-3p	255967	PAN3	NM_175854	poly(A) specific ribonuclease subunit PAN3
237	96	hsa-miR-130a-3p	25945	NECTIN3	NM_001243286	nectin cell adhesion molecule 3
238	96	hsa-miR-125a-5p	55300	PI4K2B	NM_018323	phosphatidylinositol 4-kinase type 2 beta
239	96	hsa-miR-125a-5p	7274	TTPA	NM_000370	alpha tocopherol transfer protein
240	96	hsa-miR-125a-5p	79047	KCTD15	NM_024076	potassium channel tetramerization domain containing 15
241	96	hsa-miR-125a-5p	1591	CYP24A1	NM_000782	cytochrome P450 family 24 subfamily A member 1
242	96	hsa-miR-125a-5p	146050	ZSCAN29	NM_152455	zinc finger and SCAN domain containing 29
243	96	hsa-miR-125a-5p	125919	ZNF543	NM_213598	zinc finger protein 543
244	96	hsa-miR-125a-5p	23338	JADE2	NM_001289984	jade family PHD finger 2
245	96	hsa-miR-125a-5p	57688	ZSWIM6	NM_020928	zinc finger SWIM-type containing 6
246	96	hsa-miR-125a-5p	80896	NPL	NM_001200052	N-acetylneuraminate pyruvate lyase
247	96	hsa-miR-320b	84945	ABHD13	NM_032859	abhydrolase domain containing 13
248	96	hsa-miR-320b	23528	ZNF281	NM_001281293	zinc finger protein 281
249	96	hsa-miR-320b	255967	PAN3	NM_175854	poly(A) specific ribonuclease subunit PAN3
250	95	hsa-miR-140-5p	55967	NDUFA12	NM_001258338	NADH:ubiquinone oxidoreductase subunit A12
251	95	hsa-miR-140-5p	55206	SBNO1	NM_001167856	strawberry notch homolog 1
252	95	hsa-miR-140-5p	80775	TMEM177	NM_001105198	transmembrane protein 177
253	95	hsa-miR-346	4919	ROR1	NM_005012	receptor tyrosine kinase like orphan receptor 1
254	95	hsa-miR-346	64754	SMYD3	NM_022743	SET and MYND domain containing 3
255	95	hsa-miR-346	5451	POU2F1	NM_001198783	POU class 2 homeobox 1
256	95	hsa-miR-346	55003	PAK1IP1	NM_017906	PAK1 interacting protein 1
257	95	hsa-miR-346	604	BCL6	NM_001706	BCL6, transcription repressor
258	95	hsa-miR-1-3p	7184	HSP90B1	NM_003299	heat shock protein 90 beta family member 1
259	95	hsa-miR-1-3p	22862	FNDC3A	NM_001079673	fibronectin type III domain containing 3A
260	95	hsa-miR-1-3p	254170	FBXO33	NM_203301	F-box protein 33
261	95	hsa-miR-1-3p	55364	IMPACT	NM_018439	impact RWD domain protein
262	95	hsa-miR-1-3p	1977	EIF4E	NM_001130678	eukaryotic translation initiation factor 4E
263	95	hsa-miR-1-3p	8491	MAP4K3	NM_001270425	mitogen-activated protein kinase kinase kinase kinase 3
264	95	hsa-miR-1-3p	161742	SPRED1	NM_152594	sprouty related EVH1 domain containing 1
265	95	hsa-miR-1-3p	79751	SLC25A22	NM_024698	solute carrier family 25 member 22
266	95	hsa-miR-1-3p	10090	UST	NM_005715	uronyl 2-sulfotransferase
267	95	hsa-miR-1-3p	2820	GPD2	NM_000408	glycerol-3-phosphate dehydrogenase 2
268	95	hsa-miR-1-3p	2847	MCHR1	NM_005297	melanin concentrating hormone receptor 1
269	95	hsa-miR-1-3p	23607	CD2AP	NM_012120	CD2 associated protein
270	95	hsa-miR-1-3p	867	CBL	NM_005188	Cbl proto-oncogene
271	95	hsa-miR-1-3p	25994	HIGD1A	NM_001099668	HIG1 hypoxia inducible domain family member 1A
272	95	hsa-miR-1-3p	1964	EIF1AX	NM_001412	eukaryotic translation initiation factor 1A X-linked
273	95	hsa-miR-1-3p	132789	GNPDA2	NM_001270880	glucosamine-6-phosphate deaminase 2
274	95	hsa-miR-1-3p	147463	ANKRD29	NM_001308238	ankyrin repeat domain 29
275	95	hsa-miR-1-3p	79161	TMEM243	NM_024315	transmembrane protein 243
276	95	hsa-let-7d-5p	541565	C8orf58	NM_173686	chromosome 8 open reading frame 58
277	95	hsa-let-7d-5p	84919	PPP1R15B	NM_032833	protein phosphatase 1 regulatory subunit 15B
278	95	hsa-let-7d-5p	6498	SKIL	NM_001145097	SKI like proto-oncogene
279	95	hsa-let-7d-5p	571	BACH1	NM_001186	BTB domain and CNC homolog 1
280	95	hsa-let-7d-5p	3480	IGF1R	NM_000875	insulin like growth factor 1 receptor
281	95	hsa-let-7d-5p	192670	AGO4	NM_017629	argonaute RISC catalytic component 4
282	95	hsa-let-7d-5p	79158	GNPTAB	NM_024312	N-acetylglucosamine-1-phosphate transferase subunits alpha and beta
283	95	hsa-let-7d-5p	11095	ADAMTS8	NM_007037	ADAM metallopeptidase with thrombospondin type 1 motif 8
284	95	hsa-let-7d-5p	57643	ZSWIM5	NM_020883	zinc finger SWIM-type containing 5
285	95	hsa-let-7d-5p	7069	THRSP	NM_003251	thyroid hormone responsive
286	95	hsa-let-7d-5p	113791	PIK3IP1	NM_001135911	phosphoinositide-3-kinase interacting protein 1
287	95	hsa-let-7d-5p	1281	COL3A1	NM_000090	collagen type III alpha 1 chain
288	95	hsa-let-7d-5p	55909	BIN3	NM_018688	bridging integrator 3
289	95	hsa-let-7d-5p	6809	STX3	NM_004177	syntaxin 3
290	95	hsa-miR-28-5p	9710	KIAA0355	NM_014686	KIAA0355
291	95	hsa-miR-143-3p	7274	TTPA	NM_000370	alpha tocopherol transfer protein
292	95	hsa-miR-143-3p	28996	HIPK2	NM_001113239	homeodomain interacting protein kinase 2
293	95	hsa-miR-143-3p	3845	KRAS	NM_033360	KRAS proto-oncogene, GTPase
294	95	hsa-miR-143-3p	84935	MEDAG	NM_032849	mesenteric estrogen dependent adipogenesis
295	95	hsa-miR-143-3p	51280	GOLM1	NM_177937	golgi membrane protein 1
296	95	hsa-miR-143-3p	6046	BRD2	NM_005104	bromodomain containing 2
297	95	hsa-miR-143-3p	6567	SLC16A2	NM_006517	solute carrier family 16 member 2
298	95	hsa-miR-130a-3p	9859	CEP170	NM_001042404	centrosomal protein 170
299	95	hsa-miR-130a-3p	8634	RTCA	NM_001130841	RNA 3'-terminal phosphate cyclase
300	95	hsa-miR-130a-3p	63971	KIF13A	NM_001105568	kinesin family member 13A
301	95	hsa-miR-130a-3p	51128	SAR1B	NM_001033503	secretion associated Ras related GTPase 1B
302	95	hsa-miR-130a-3p	55914	ERBIN	NM_001006600	erbb2 interacting protein
303	95	hsa-miR-130a-3p	57146	TMEM159	NM_001301769	transmembrane protein 159
304	95	hsa-miR-130a-3p	152503	SH3D19	NM_001009555	SH3 domain containing 19
305	95	hsa-miR-130a-3p	4154	MBNL1	NM_207297	muscleblind like splicing regulator 1
306	95	hsa-miR-130a-3p	221981	THSD7A	NM_015204	thrombospondin type 1 domain containing 7A
307	95	hsa-miR-130a-3p	9470	EIF4E2	NM_001282958	eukaryotic translation initiation factor 4E family member 2
308	95	hsa-miR-130a-3p	54476	RNF216	NM_207111	ring finger protein 216
309	95	hsa-miR-130a-3p	8323	FZD6	NM_001164615	frizzled class receptor 6
310	95	hsa-miR-130a-3p	10979	FERMT2	NM_001134999	fermitin family member 2
311	95	hsa-miR-130a-3p	5277	PIGA	NM_002641	phosphatidylinositol glycan anchor biosynthesis class A
312	95	hsa-miR-130a-3p	4762	NEUROG1	NM_006161	neurogenin 1
313	95	hsa-miR-130a-3p	64864	RFX7	NM_022841	regulatory factor X7
314	95	hsa-miR-130a-3p	57620	STIM2	NM_001169117	stromal interaction molecule 2
315	95	hsa-miR-130a-3p	9706	ULK2	NM_014683	unc-51 like autophagy activating kinase 2
316	95	hsa-miR-130a-3p	10800	CYSLTR1	NM_006639	cysteinyl leukotriene receptor 1
317	95	hsa-miR-125a-5p	55206	SBNO1	NM_001167856	strawberry notch homolog 1
318	95	hsa-miR-125a-5p	2028	ENPEP	NM_001977	glutamyl aminopeptidase
319	95	hsa-miR-125a-5p	63941	NECAB3	NM_031232	N-terminal EF-hand calcium binding protein 3
320	95	hsa-miR-125a-5p	84542	KIAA1841	NM_001129993	KIAA1841
321	95	hsa-miR-125a-5p	4520	MTF1	NM_005955	metal regulatory transcription factor 1
322	95	hsa-miR-125a-5p	114883	OSBPL9	NM_148904	oxysterol binding protein like 9
323	95	hsa-miR-125a-5p	64118	DUS1L	NM_022156	dihydrouridine synthase 1 like
324	95	hsa-miR-125a-5p	9525	VPS4B	NM_004869	vacuolar protein sorting 4 homolog B
325	95	hsa-miR-125a-5p	119504	ANAPC16	NM_001242546	anaphase promoting complex subunit 16
326	95	hsa-miR-125a-5p	3988	LIPA	NM_000235	lipase A, lysosomal acid type
327	95	hsa-miR-125a-5p	6753	SSTR3	NM_001051	somatostatin receptor 3
328	95	hsa-miR-125a-5p	283659	PRTG	NM_173814	protogenin
329	95	hsa-miR-125a-5p	1003	CDH5	NM_001795	cadherin 5
330	95	hsa-miR-125a-5p	219855	SLC37A2	NM_001145290	solute carrier family 37 member 2
331	95	hsa-miR-320b	728492	SERF1B	NM_001178087	small EDRK-rich factor 1B
332	95	hsa-miR-320b	10285	SMNDC1	NM_005871	survival motor neuron domain containing 1
333	95	hsa-miR-320b	55207	ARL8B	NM_018184	ADP ribosylation factor like GTPase 8B
334	95	hsa-miR-320b	4300	MLLT3	NM_001286691	MLLT3, super elongation complex subunit
335	95	hsa-miR-320b	1362	CPD	NM_001199775	carboxypeptidase D
336	95	hsa-miR-320b	10776	ARPP19	NM_001306191	cAMP regulated phosphoprotein 19
337	95	hsa-miR-320b	10618	TGOLN2	NM_006464	trans-golgi network protein 2
338	95	hsa-miR-320b	347730	LRRTM1	NM_178839	leucine rich repeat transmembrane neuronal 1
339	95	hsa-miR-320b	92140	MTDH	NM_178812	metadherin
340	95	hsa-miR-320b	8293	SERF1A	NM_022968	small EDRK-rich factor 1A
341	95	hsa-miR-320b	80824	DUSP16	NM_030640	dual specificity phosphatase 16
342	95	hsa-miR-320b	1939	EIF2D	NM_006893	eukaryotic translation initiation factor 2D
343	95	hsa-miR-320b	9931	HELZ	NM_014877	helicase with zinc finger
1	100	hsa-miR-150-5p	9899	SV2B	NM_014848	synaptic vesicle glycoprotein 2B
2	100	hsa-miR-150-5p	4602	MYB	NM_001161659	MYB proto-oncogene, transcription factor
3	100	hsa-miR-182-5p	5567	PRKACB	NM_001242857	protein kinase cAMP-activated catalytic subunit beta
4	100	hsa-miR-182-5p	26575	RGS17	NM_012419	regulator of G protein signaling 17
5	100	hsa-miR-182-5p	54796	BNC2	NM_001317939	basonuclin 2
6	100	hsa-miR-182-5p	401548	SNX30	NM_001012994	sorting nexin family member 30
7	100	hsa-miR-182-5p	4026	LPP	NM_001167671	LIM domain containing preferred translocation partner in lipoma
8	100	hsa-miR-182-5p	4286	MITF	NM_000248	melanocyte inducing transcription factor
9	100	hsa-miR-182-5p	10818	FRS2	NM_001042555	fibroblast growth factor receptor substrate 2
10	100	hsa-miR-182-5p	23271	CAMSAP2	NM_001297707	calmodulin regulated spectrin associated protein family member 2
11	100	hsa-miR-182-5p	3037	HAS2	NM_005328	hyaluronan synthase 2
12	100	hsa-miR-486-5p	9044	BTAF1	NM_003972	B-TFIID TATA-box binding protein associated factor 1
13	100	hsa-miR-181b-5p	153222	CREBRF	NM_153607	CREB3 regulatory factor
14	100	hsa-miR-181b-5p	9847	C2CD5	NM_001286173	C2 calcium dependent domain containing 5
15	100	hsa-miR-181b-5p	84622	ZNF594	NM_032530	zinc finger protein 594
16	100	hsa-miR-181b-5p	10795	ZNF268	NM_152943	zinc finger protein 268
17	100	hsa-miR-181b-5p	90594	ZNF439	NM_152262	zinc finger protein 439
18	100	hsa-miR-181b-5p	1654	DDX3X	NM_001193416	DEAD-box helicase 3 X-linked
19	100	hsa-miR-181b-5p	163115	ZNF781	NM_152605	zinc finger protein 781
20	100	hsa-miR-181b-5p	283659	PRTG	NM_173814	protogenin
21	100	hsa-miR-181b-5p	23321	TRIM2	NM_015271	tripartite motif containing 2
22	100	hsa-miR-181b-5p	143686	SESN3	NM_144665	sestrin 3
23	100	hsa-miR-181b-5p	3842	TNPO1	NM_002270	transportin 1
24	100	hsa-miR-181b-5p	146198	ZFP90	NM_001305207	ZFP90 zinc finger protein
25	100	hsa-miR-181b-5p	7587	ZNF37A	NM_001324259	zinc finger protein 37A
26	100	hsa-miR-181b-5p	163131	ZNF780B	NM_001005851	zinc finger protein 780B
27	100	hsa-miR-181b-5p	4297	KMT2A	NM_001197104	lysine methyltransferase 2A
28	99	hsa-miR-150-5p	4194	MDM4	NM_001278518	MDM4, p53 regulator
29	99	hsa-miR-150-5p	79602	ADIPOR2	NM_024551	adiponectin receptor 2
30	99	hsa-miR-182-5p	79057	PRRG3	NM_024082	proline rich and Gla domain 3
31	99	hsa-miR-182-5p	2034	EPAS1	NM_001430	endothelial PAS domain protein 1
32	99	hsa-miR-182-5p	23022	PALLD	NM_001166108	palladin, cytoskeletal associated protein
33	99	hsa-miR-182-5p	54165	DCUN1D1	NM_001308101	defective in cullin neddylation 1 domain containing 1
34	99	hsa-miR-182-5p	55334	SLC39A9	NM_018375	solute carrier family 39 member 9
35	99	hsa-miR-182-5p	9341	VAMP3	NM_004781	vesicle associated membrane protein 3
36	99	hsa-miR-182-5p	9788	MTSS1	NM_001282971	MTSS1, I-BAR domain containing
37	99	hsa-miR-182-5p	4884	NPTX1	NM_002522	neuronal pentraxin 1
38	99	hsa-miR-182-5p	340533	NEXMIF	NM_001008537	neurite extension and migration factor
39	99	hsa-miR-182-5p	23607	CD2AP	NM_012120	CD2 associated protein
40	99	hsa-miR-182-5p	6975	TECTB	NM_058222	tectorin beta
41	99	hsa-miR-182-5p	283659	PRTG	NM_173814	protogenin
42	99	hsa-miR-182-5p	221178	SPATA13	NM_001286795	spermatogenesis associated 13
43	99	hsa-miR-182-5p	10927	SPIN1	NM_006717	spindlin 1
44	99	hsa-miR-182-5p	785	CACNB4	NM_000726	calcium voltage-gated channel auxiliary subunit beta 4
45	99	hsa-miR-182-5p	4238	MFAP3	NM_001135037	microfibril associated protein 3
46	99	hsa-miR-182-5p	10801	2009-09-01	NM_001113491	septin 9
47	99	hsa-miR-182-5p	2017	CTTN	NM_005231	cortactin
48	99	hsa-miR-182-5p	83988	NCALD	NM_001040624	neurocalcin delta
49	99	hsa-miR-6819-3p	26018	LRIG1	NM_015541	leucine rich repeats and immunoglobulin like domains 1
50	99	hsa-miR-181b-5p	55137	FIGN	NM_001321825	fidgetin, microtubule severing factor
51	99	hsa-miR-181b-5p	678	ZFP36L2	NM_006887	ZFP36 ring finger protein like 2
52	99	hsa-miR-181b-5p	1901	S1PR1	NM_001320730	sphingosine-1-phosphate receptor 1
53	99	hsa-miR-181b-5p	26031	OSBPL3	NM_015550	oxysterol binding protein like 3
54	99	hsa-miR-181b-5p	284323	ZNF780A	NM_001010880	zinc finger protein 780A
55	99	hsa-miR-181b-5p	8654	PDE5A	NM_001083	phosphodiesterase 5A
56	99	hsa-miR-181b-5p	23312	DMXL2	NM_001174116	Dmx like 2
57	99	hsa-miR-181b-5p	2744	GLS	NM_014905	glutaminase
58	99	hsa-miR-181b-5p	7547	ZIC3	NM_003413	Zic family member 3
59	99	hsa-miR-181b-5p	284391	ZNF844	NM_001136501	zinc finger protein 844
60	99	hsa-miR-181b-5p	23262	PPIP5K2	NM_001276277	diphosphoinositol pentakisphosphate kinase 2
61	99	hsa-miR-181b-5p	5629	PROX1	NM_002763	prospero homeobox 1
62	99	hsa-miR-181b-5p	57673	BEND3	NM_001080450	BEN domain containing 3
63	99	hsa-miR-181b-5p	6249	CLIP1	NM_001247997	CAP-Gly domain containing linker protein 1
64	99	hsa-miR-181b-5p	57495	NWD2	NM_001144990	NACHT and WD repeat domain containing 2
65	99	hsa-miR-181b-5p	29094	LGALSL	NM_014181	galectin like
66	99	hsa-miR-181b-5p	93	ACVR2B	NM_001106	activin A receptor type 2B
67	99	hsa-miR-181b-5p	64282	TENT4B	NM_001040284	terminal nucleotidyltransferase 4B
68	99	hsa-miR-181b-5p	79088	ZNF426	NM_001318056	zinc finger protein 426
69	99	hsa-miR-181b-5p	340533	NEXMIF	NM_001008537	neurite extension and migration factor
70	99	hsa-miR-181b-5p	84527	ZNF559	NM_001202409	zinc finger protein 559
71	99	hsa-miR-181b-5p	9185	REPS2	NM_004726	RALBP1 associated Eps domain containing 2
72	99	hsa-miR-181b-5p	131405	TRIM71	NM_001039111	tripartite motif containing 71
73	98	hsa-miR-182-5p	10097	ACTR2	NM_001005386	ARP2 actin related protein 2 homolog
74	98	hsa-miR-182-5p	84945	ABHD13	NM_032859	abhydrolase domain containing 13
75	98	hsa-miR-182-5p	112	ADCY6	NM_015270	adenylate cyclase 6
76	98	hsa-miR-182-5p	2295	FOXF2	NM_001452	forkhead box F2
77	98	hsa-miR-182-5p	253559	CADM2	NM_001167674	cell adhesion molecule 2
78	98	hsa-miR-182-5p	6875	TAF4B	NM_001293725	TATA-box binding protein associated factor 4b
79	98	hsa-miR-182-5p	1910	EDNRB	NM_001201397	endothelin receptor type B
80	98	hsa-miR-182-5p	10890	RAB10	NM_016131	RAB10, member RAS oncogene family
81	98	hsa-miR-182-5p	9771	RAPGEF5	NM_012294	Rap guanine nucleotide exchange factor 5
82	98	hsa-miR-182-5p	57631	LRCH2	NM_001243963	leucine rich repeats and calponin homology domain containing 2
83	98	hsa-miR-182-5p	53344	CHIC1	NM_001039840	cysteine rich hydrophobic domain 1
84	98	hsa-miR-182-5p	677	ZFP36L1	NM_004926	ZFP36 ring finger protein like 1
85	98	hsa-miR-182-5p	22990	PCNX1	NM_001308160	pecanex 1
86	98	hsa-miR-182-5p	375449	MAST4	NM_001297651	microtubule associated serine/threonine kinase family member 4
87	98	hsa-miR-182-5p	3708	ITPR1	NM_001099952	inositol 1,4,5-trisphosphate receptor type 1
88	98	hsa-miR-182-5p	5921	RASA1	NM_002890	RAS p21 protein activator 1
89	98	hsa-miR-182-5p	22853	LMTK2	NM_014916	lemur tyrosine kinase 2
90	98	hsa-miR-182-5p	8975	USP13	NM_003940	ubiquitin specific peptidase 13
91	98	hsa-miR-182-5p	2309	FOXO3	NM_001455	forkhead box O3
92	98	hsa-miR-486-5p	6632	SNRPD1	NM_001291916	small nuclear ribonucleoprotein D1 polypeptide
93	98	hsa-miR-486-5p	2308	FOXO1	NM_002015	forkhead box O1
94	98	hsa-miR-486-5p	55422	ZNF331	NM_001317115	zinc finger protein 331
95	98	hsa-miR-181b-5p	23171	GPD1L	NM_015141	glycerol-3-phosphate dehydrogenase 1 like
96	98	hsa-miR-181b-5p	154214	RNF217	NM_152553	ring finger protein 217
97	98	hsa-miR-181b-5p	81848	SPRY4	NM_001127496	sprouty RTK signaling antagonist 4
98	98	hsa-miR-181b-5p	23216	TBC1D1	NM_001253913	TBC1 domain family member 1
99	98	hsa-miR-181b-5p	23492	CBX7	NM_175709	chromobox 7
100	98	hsa-miR-181b-5p	58508	KMT2C	NM_170606	lysine methyltransferase 2C
101	98	hsa-miR-181b-5p	382	ARF6	NM_001663	ADP ribosylation factor 6
102	98	hsa-miR-181b-5p	23228	PLCL2	NM_001144382	phospholipase C like 2
103	98	hsa-miR-181b-5p	2554	GABRA1	NM_000806	gamma-aminobutyric acid type A receptor alpha1 subunit
104	98	hsa-miR-181b-5p	6696	SPP1	NM_001251830	secreted phosphoprotein 1
105	98	hsa-miR-181b-5p	9991	PTBP3	NM_001163788	polypyrimidine tract binding protein 3
106	98	hsa-miR-181b-5p	140609	NEK7	NM_133494	NIMA related kinase 7
107	98	hsa-miR-181b-5p	164	AP1G1	NM_001030007	adaptor related protein complex 1 subunit gamma 1
108	98	hsa-miR-181b-5p	56479	KCNQ5	NM_001160130	potassium voltage-gated channel subfamily Q member 5
109	98	hsa-miR-181b-5p	9425	CDYL	NM_001143970	chromodomain Y like
110	98	hsa-miR-181b-5p	3558	IL2	NM_000586	interleukin 2
111	98	hsa-miR-181b-5p	50937	CDON	NM_016952	cell adhesion associated, oncogene regulated
112	98	hsa-miR-181b-5p	6018	RLF	NM_012421	rearranged L-myc fusion
113	98	hsa-miR-181b-5p	117178	SSX2IP	NM_001166293	SSX family member 2 interacting protein
114	98	hsa-miR-181b-5p	9772	TMEM94	NM_001321148	transmembrane protein 94
115	98	hsa-miR-181b-5p	113251	LARP4	NM_052879	La ribonucleoprotein domain family member 4
116	98	hsa-miR-181b-5p	93624	TADA2B	NM_152293	transcriptional adaptor 2B
117	98	hsa-miR-3620-3p	26099	SZRD1	NM_001114600	SUZ RNA binding domain containing 1
118	97	hsa-miR-4433a-5p	5782	PTPN12	NM_001131009	protein tyrosine phosphatase, non-receptor type 12
119	97	hsa-miR-182-5p	55854	ZC3H15	NM_018471	zinc finger CCCH-type containing 15
120	97	hsa-miR-182-5p	9223	MAGI1	NM_001033057	membrane associated guanylate kinase, WW and PDZ domain containing 1
121	97	hsa-miR-182-5p	29114	TAGLN3	NM_001008272	transgelin 3
122	97	hsa-miR-182-5p	5916	RARG	NM_000966	retinoic acid receptor gamma
123	97	hsa-miR-182-5p	3975	LHX1	NM_005568	LIM homeobox 1
124	97	hsa-miR-182-5p	2776	GNAQ	NM_002072	G protein subunit alpha q
125	97	hsa-miR-182-5p	3987	LIMS1	NM_001193482	LIM zinc finger domain containing 1
126	97	hsa-miR-182-5p	283464	GXYLT1	NM_001099650	glucoside xylosyltransferase 1
127	97	hsa-miR-182-5p	51299	NRN1	NM_001278710	neuritin 1
128	97	hsa-miR-182-5p	8859	STK19	NM_004197	serine/threonine kinase 19
129	97	hsa-miR-182-5p	3480	IGF1R	NM_000875	insulin like growth factor 1 receptor
130	97	hsa-miR-182-5p	863	CBFA2T3	NM_005187	CBFA2/RUNX1 translocation partner 3
131	97	hsa-miR-182-5p	10211	FLOT1	NM_001318875	flotillin 1
132	97	hsa-miR-182-5p	3205	HOXA9	NM_152739	homeobox A9
133	97	hsa-miR-182-5p	27154	BRPF3	NM_015695	bromodomain and PHD finger containing 3
134	97	hsa-miR-182-5p	8065	CUL5	NM_003478	cullin 5
135	97	hsa-miR-182-5p	221061	FAM171A1	NM_001010924	family with sequence similarity 171 member A1
136	97	hsa-miR-182-5p	5469	MED1	NM_004774	mediator complex subunit 1
137	97	hsa-miR-182-5p	25924	MYRIP	NM_001284423	myosin VIIA and Rab interacting protein
138	97	hsa-miR-182-5p	388630	TRABD2B	NM_001194986	TraB domain containing 2B
139	97	hsa-miR-182-5p	90780	PYGO2	NM_138300	pygopus family PHD finger 2
140	97	hsa-miR-182-5p	151742	PPM1L	NM_001317911	protein phosphatase, Mg2+/Mn2+ dependent 1L
141	97	hsa-miR-486-5p	1630	DCC	NM_005215	DCC netrin 1 receptor
142	97	hsa-miR-486-5p	344148	NCKAP5	NM_207363	NCK associated protein 5
143	97	hsa-miR-486-5p	81889	FAHD1	NM_001018104	fumarylacetoacetate hydrolase domain containing 1
144	97	hsa-miR-486-5p	5728	PTEN	NM_001304718	phosphatase and tensin homolog
145	97	hsa-miR-486-5p	84068	SLC10A7	NM_001300842	solute carrier family 10 member 7
146	97	hsa-miR-486-5p	55521	TRIM36	NM_001300759	tripartite motif containing 36
147	97	hsa-miR-486-5p	64708	COPS7B	NM_001308381	COP9 signalosome subunit 7B
148	97	hsa-miR-181b-5p	22903	BTBD3	NM_001282550	BTB domain containing 3
149	97	hsa-miR-181b-5p	6319	SCD	NM_005063	stearoyl-CoA desaturase
150	97	hsa-miR-181b-5p	4185	ADAM11	NM_001318933	ADAM metallopeptidase domain 11
151	97	hsa-miR-181b-5p	79598	CEP97	NM_024548	centrosomal protein 97
152	97	hsa-miR-181b-5p	64599	GIGYF1	NM_022574	GRB10 interacting GYF protein 1
153	97	hsa-miR-181b-5p	146434	ZNF597	NM_152457	zinc finger protein 597
154	97	hsa-miR-181b-5p	57568	SIPA1L2	NM_020808	signal induced proliferation associated 1 like 2
155	97	hsa-miR-181b-5p	5451	POU2F1	NM_001198783	POU class 2 homeobox 1
156	97	hsa-miR-181b-5p	619279	ZNF704	NM_001033723	zinc finger protein 704
157	97	hsa-miR-181b-5p	54891	INO80D	NM_017759	INO80 complex subunit D
158	97	hsa-miR-181b-5p	7320	UBE2B	NM_003337	ubiquitin conjugating enzyme E2 B
159	97	hsa-miR-181b-5p	7903	ST8SIA4	NM_005668	ST8 alpha-N-acetyl-neuraminide alpha-2,8-sialyltransferase 4
160	97	hsa-miR-3620-3p	3745	KCNB1	NM_004975	potassium voltage-gated channel subfamily B member 1
161	96	hsa-miR-150-5p	5069	PAPPA	NM_002581	pappalysin 1
162	96	hsa-miR-150-5p	1106	CHD2	NM_001271	chromodomain helicase DNA binding protein 2
163	96	hsa-miR-150-5p	117143	TADA1	NM_053053	transcriptional adaptor 1
164	96	hsa-miR-150-5p	10409	BASP1	NM_001271606	brain abundant membrane attached signal protein 1
165	96	hsa-miR-150-5p	4897	NRCAM	NM_001193583	neuronal cell adhesion molecule
166	96	hsa-miR-182-5p	56243	KIAA1217	NM_019590	KIAA1217
167	96	hsa-miR-182-5p	84376	HOOK3	NM_032410	hook microtubule tethering protein 3
168	96	hsa-miR-182-5p	22987	SV2C	NM_014979	synaptic vesicle glycoprotein 2C
169	96	hsa-miR-182-5p	83596	BCL2L12	NM_001282517	BCL2 like 12
170	96	hsa-miR-182-5p	9815	GIT2	NM_001135213	GIT ArfGAP 2
171	96	hsa-miR-182-5p	84312	BRMS1L	NM_032352	BRMS1 like transcriptional repressor
172	96	hsa-miR-182-5p	55023	PHIP	NM_017934	pleckstrin homology domain interacting protein
173	96	hsa-miR-182-5p	83604	TMEM47	NM_031442	transmembrane protein 47
174	96	hsa-miR-182-5p	374986	MIGA1	NM_001270384	mitoguardin 1
175	96	hsa-miR-182-5p	64778	FNDC3B	NM_001135095	fibronectin type III domain containing 3B
176	96	hsa-miR-182-5p	664	BNIP3	NM_004052	BCL2 interacting protein 3
177	96	hsa-miR-182-5p	196441	ZFC3H1	NM_144982	zinc finger C3H1-type containing
178	96	hsa-miR-182-5p	26512	INTS6	NM_001039937	integrator complex subunit 6
179	96	hsa-miR-182-5p	123879	DCUN1D3	NM_173475	defective in cullin neddylation 1 domain containing 3
180	96	hsa-miR-182-5p	159371	SLC35G1	NM_001134658	solute carrier family 35 member G1
181	96	hsa-miR-182-5p	5813	PURA	NM_005859	purine rich element binding protein A
182	96	hsa-miR-182-5p	51645	PPIL1	NM_016059	peptidylprolyl isomerase like 1
183	96	hsa-miR-182-5p	56256	SERTAD4	NM_019605	SERTA domain containing 4
184	96	hsa-miR-182-5p	7813	EVI5	NM_001308248	ecotropic viral integration site 5
185	96	hsa-miR-182-5p	120	ADD3	NM_001121	adducin 3
186	96	hsa-miR-182-5p	3897	L1CAM	NM_000425	L1 cell adhesion molecule
187	96	hsa-miR-182-5p	154743	BMT2	NM_152556	base methyltransferase of 25S rRNA 2 homolog
188	96	hsa-miR-182-5p	10274	STAG1	NM_005862	stromal antigen 1
189	96	hsa-miR-182-5p	9890	PLPPR4	NM_001166252	phospholipid phosphatase related 4
190	96	hsa-miR-182-5p	23266	ADGRL2	NM_001297706	adhesion G protein-coupled receptor L2
191	96	hsa-miR-182-5p	7532	YWHAG	NM_012479	tyrosine 3-monooxygenase/tryptophan 5-monooxygenase activation protein gamma
192	96	hsa-miR-182-5p	9734	HDAC9	NM_001321877	histone deacetylase 9
193	96	hsa-miR-182-5p	140883	ZNF280B	NM_080764	zinc finger protein 280B
194	96	hsa-miR-182-5p	57142	RTN4	NM_001321859	reticulon 4
195	96	hsa-miR-486-5p	353145	LCE3E	NM_178435	late cornified envelope 3E
196	96	hsa-miR-486-5p	9912	ARHGAP44	NM_001321164	Rho GTPase activating protein 44
197	96	hsa-miR-181b-5p	8577	TMEFF1	NM_003692	transmembrane protein with EGF like and two follistatin like domains 1
198	96	hsa-miR-181b-5p	4139	MARK1	NM_001286124	microtubule affinity regulating kinase 1
199	96	hsa-miR-181b-5p	126070	ZNF440	NM_152357	zinc finger protein 440
200	96	hsa-miR-181b-5p	55900	ZNF302	NM_001289192	zinc finger protein 302
201	96	hsa-miR-181b-5p	490	ATP2B1	NM_001001323	ATPase plasma membrane Ca2+ transporting 1
202	96	hsa-miR-181b-5p	23317	DNAJC13	NM_015268	DnaJ heat shock protein family (Hsp40) member C13
203	96	hsa-miR-181b-5p	56907	SPIRE1	NM_001128626	spire type actin nucleation factor 1
204	96	hsa-miR-181b-5p	7469	NELFA	NM_005663	negative elongation factor complex member A
205	96	hsa-miR-181b-5p	23760	PITPNB	NM_001284278	phosphatidylinositol transfer protein beta
206	96	hsa-miR-181b-5p	677	ZFP36L1	NM_004926	ZFP36 ring finger protein like 1
207	96	hsa-miR-181b-5p	57282	SLC4A10	NM_001178015	solute carrier family 4 member 10
208	96	hsa-miR-181b-5p	51312	SLC25A37	NM_001317812	solute carrier family 25 member 37
209	96	hsa-miR-181b-5p	9732	DOCK4	NM_014705	dedicator of cytokinesis 4
210	96	hsa-miR-181b-5p	84910	TMEM87B	NM_032824	transmembrane protein 87B
211	96	hsa-miR-181b-5p	79642	ARSJ	NM_024590	arylsulfatase family member J
212	96	hsa-miR-181b-5p	4283	CXCL9	NM_002416	C-X-C motif chemokine ligand 9
213	96	hsa-miR-181b-5p	151963	MB21D2	NM_178496	Mab-21 domain containing 2
214	96	hsa-miR-181b-5p	50650	ARHGEF3	NM_001128615	Rho guanine nucleotide exchange factor 3
215	96	hsa-miR-181b-5p	22823	MTF2	NM_001164391	metal response element binding transcription factor 2
216	96	hsa-miR-181b-5p	56147	PCDHA1	NM_031410	protocadherin alpha 1
217	96	hsa-miR-3620-3p	4076	CAPRIN1	NM_005898	cell cycle associated protein 1
218	96	hsa-miR-3620-3p	3790	KCNS3	NM_001282428	potassium voltage-gated channel modifier subfamily S member 3
219	95	hsa-miR-150-5p	3199	HOXA2	NM_006735	homeobox A2
220	95	hsa-miR-150-5p	199713	NLRP7	NM_139176	NLR family pyrin domain containing 7
221	95	hsa-miR-150-5p	260293	CYP4X1	NM_001320289	cytochrome P450 family 4 subfamily X member 1
222	95	hsa-miR-4433a-5p	1678	TIMM8A	NM_004085	translocase of inner mitochondrial membrane 8A
223	95	hsa-miR-4433a-5p	677	ZFP36L1	NM_004926	ZFP36 ring finger protein like 1
224	95	hsa-miR-182-5p	2845	GPR22	NM_005295	G protein-coupled receptor 22
225	95	hsa-miR-182-5p	9197	SLC33A1	NM_004733	solute carrier family 33 member 1
226	95	hsa-miR-182-5p	5922	RASA2	NM_001303245	RAS p21 protein activator 2
227	95	hsa-miR-182-5p	728458	OPN1MW2	NM_001048181	opsin 1, medium wave sensitive 2
228	95	hsa-miR-182-5p	26505	CNNM3	NM_017623	cyclin and CBS domain divalent metal cation transport mediator 3
229	95	hsa-miR-182-5p	84079	ANKRD27	NM_032139	ankyrin repeat domain 27
230	95	hsa-miR-182-5p	1272	CNTN1	NM_175038	contactin 1
231	95	hsa-miR-182-5p	4117	MAK	NM_001242385	male germ cell associated kinase
232	95	hsa-miR-182-5p	114884	OSBPL10	NM_017784	oxysterol binding protein like 10
233	95	hsa-miR-182-5p	5119	CHMP1A	NM_002768	charged multivesicular body protein 1A
234	95	hsa-miR-182-5p	51134	CEP83	NM_001042399	centrosomal protein 83
235	95	hsa-miR-182-5p	130612	TMEM198	NM_001005209	transmembrane protein 198
236	95	hsa-miR-182-5p	5956	OPN1LW	NM_020061	opsin 1, long wave sensitive
237	95	hsa-miR-182-5p	5048	PAFAH1B1	NM_000430	platelet activating factor acetylhydrolase 1b regulatory subunit 1
238	95	hsa-miR-182-5p	221895	JAZF1	NM_175061	JAZF zinc finger 1
239	95	hsa-miR-182-5p	55294	FBXW7	NM_033632	F-box and WD repeat domain containing 7
240	95	hsa-miR-182-5p	3344	FOXN2	NM_002158	forkhead box N2
241	95	hsa-miR-182-5p	441027	TMEM150C	NM_001080506	transmembrane protein 150C
242	95	hsa-miR-182-5p	152	ADRA2C	NM_000683	adrenoceptor alpha 2C
243	95	hsa-miR-182-5p	10396	ATP8A1	NM_001105529	ATPase phospholipid transporting 8A1
244	95	hsa-miR-182-5p	1960	EGR3	NM_001199880	early growth response 3
245	95	hsa-miR-182-5p	50650	ARHGEF3	NM_001128615	Rho guanine nucleotide exchange factor 3
246	95	hsa-miR-182-5p	7058	THBS2	NM_003247	thrombospondin 2
247	95	hsa-miR-182-5p	283638	CEP170B	NM_001112726	centrosomal protein 170B
248	95	hsa-miR-182-5p	23064	SETX	NM_015046	senataxin
249	95	hsa-miR-182-5p	256380	SCML4	NM_001286408	Scm polycomb group protein like 4
250	95	hsa-miR-182-5p	283489	CHAMP1	NM_001164144	chromosome alignment maintaining phosphoprotein 1
251	95	hsa-miR-182-5p	5793	PTPRG	NM_002841	protein tyrosine phosphatase, receptor type G
252	95	hsa-miR-182-5p	29956	CERS2	NM_022075	ceramide synthase 2
253	95	hsa-miR-182-5p	133686	NADK2	NM_001085411	NAD kinase 2, mitochondrial
254	95	hsa-miR-182-5p	84457	PHYHIPL	NM_001143774	phytanoyl-CoA 2-hydroxylase interacting protein like
255	95	hsa-miR-182-5p	118788	PIK3AP1	NM_152309	phosphoinositide-3-kinase adaptor protein 1
256	95	hsa-miR-486-5p	4139	MARK1	NM_001286124	microtubule affinity regulating kinase 1
257	95	hsa-miR-486-5p	22853	LMTK2	NM_014916	lemur tyrosine kinase 2
258	95	hsa-miR-486-5p	51104	ABHD17B	NM_001025780	abhydrolase domain containing 17B
259	95	hsa-miR-181b-5p	5324	PLAG1	NM_001114634	PLAG1 zinc finger
260	95	hsa-miR-181b-5p	55629	PNRC2	NM_017761	proline rich nuclear receptor coactivator 2
261	95	hsa-miR-181b-5p	57677	ZFP14	NM_001297619	ZFP14 zinc finger protein
262	95	hsa-miR-181b-5p	79647	AKIRIN1	NM_001136275	akirin 1
263	95	hsa-miR-181b-5p	54842	MFSD6	NM_017694	major facilitator superfamily domain containing 6
264	95	hsa-miR-181b-5p	22906	TRAK1	NM_001042646	trafficking kinesin protein 1
265	95	hsa-miR-181b-5p	4004	LMO1	NM_001270428	LIM domain only 1
266	95	hsa-miR-181b-5p	79768	KATNBL1	NM_024713	katanin regulatory subunit B1 like 1
267	95	hsa-miR-181b-5p	114882	OSBPL8	NM_001003712	oxysterol binding protein like 8
268	95	hsa-miR-181b-5p	2820	GPD2	NM_000408	glycerol-3-phosphate dehydrogenase 2
269	95	hsa-miR-181b-5p	57659	ZBTB4	NM_001128833	zinc finger and BTB domain containing 4
270	95	hsa-miR-181b-5p	80167	ABHD18	NM_001319306	abhydrolase domain containing 18
271	95	hsa-miR-181b-5p	7046	TGFBR1	NM_001130916	transforming growth factor beta receptor 1
272	95	hsa-miR-181b-5p	51105	PHF20L1	NM_001277196	PHD finger protein 20 like 1
273	95	hsa-miR-181b-5p	10040	TOM1L1	NM_001321174	target of myb1 like 1 membrane trafficking protein
274	95	hsa-miR-181b-5p	9113	LATS1	NM_004690	large tumor suppressor kinase 1
275	95	hsa-miR-181b-5p	7342	UBP1	NM_001128160	upstream binding protein 1
276	95	hsa-miR-181b-5p	91526	ANKRD44	NM_001195144	ankyrin repeat domain 44
277	95	hsa-miR-181b-5p	10915	TCERG1	NM_001040006	transcription elongation regulator 1
278	95	hsa-miR-181b-5p	23387	SIK3	NM_001281748	SIK family kinase 3
279	95	hsa-miR-181b-5p	389421	LIN28B	NM_001004317	lin-28 homolog B
280	95	hsa-miR-181b-5p	3224	HOXC8	NM_022658	homeobox C8
281	95	hsa-miR-181b-5p	221184	CPNE2	NM_152727	copine 2
282	95	hsa-miR-181b-5p	7068	THRB	NM_000461	thyroid hormone receptor beta
283	95	hsa-miR-181b-5p	115	ADCY9	NM_001116	adenylate cyclase 9
284	95	hsa-miR-181b-5p	11127	KIF3A	NM_001300791	kinesin family member 3A
285	95	hsa-miR-181b-5p	8500	PPFIA1	NM_003626	PTPRF interacting protein alpha 1
286	95	hsa-miR-3620-3p	23119	HIC2	NM_015094	HIC ZBTB transcriptional repressor 2
287	95	hsa-miR-3620-3p	29982	NRBF2	NM_001282405	nuclear receptor binding factor 2
288	95	hsa-miR-3620-3p	133686	NADK2	NM_001085411	NAD kinase 2, mitochondrial
